# Supplementary material
Source: publisher site journal article supplement (https://www.spandidos-publications.com/8669/downloadSupplementary)
Supplement: Supplementary file 1 [file downloadSupplementary]

## Sheet: SI
Table SI. Evaluation of toxicity.
AP	Molecular weight	ADMETLAB	ProTox	SMILES	Relationship between AP and HCC
1,3-Butadiene	54.09	0.541	0.83	C=CC=C	Mouse inhalation studies have shown that 1,3-butadiene exposure is associated with an increased incidence of HCC (1). In addition, N-7-(2,3,4-trihydroxybut-1-yl) guanine (THB-Gua) adducts, as well as demethylation of global DNA and repetitive elements, were detected in the liver DNA of mice exposed to 1,3-butadiene (2).
Benzene	78.11	0.969	0.92	C1=CC=CC=C1	Benzene is metabolized primarily in the liver into a series of phenolic and ring-opened products and their conjugates. Exposure to benzene has been associated with hepatocellular DNA damage and an increased risk of HCC (3).
Carbon monoxide	28.01	1	0.51	(C-)#(O+)	CO is a carbon oxide compound that can be generated by the incomplete combustion of fossil fuels. CO induces HO-1 expression through activation of the Nrf2 pathway and participates in HO-1/CO axis-mediated signaling, thereby activating the ERK1/2 pathway, promoting Smad3 phosphorylation at Thr179, and attenuating TGF-β-mediated growth inhibition, which may, to some extent, facilitate the prolifer…
Nitric oxide	31.01	0.635	0.59	(N)=O	In industry, NO is a key raw material for the production of nitric acid and other nitrogen oxides, and is also one of the major pollutants in automobile exhaust. It plays an important pro-tumor role in the occurrence and progression of hepatocellular carcinoma. Persistent inflammatory stimulation can induce upregulation of inducible NO synthase, thereby leading to excessive NO production. High le…
Nitrogen dioxide	47.01	0.976	0.51	N(=O)(O)	Meta-analyses have found that exposure to nitrogen dioxide is significantly associated with an increased risk of HCC incidence (7). In addition, mechanistic studies have reported that nitrogen dioxide can promote DNA damage and genomic instability by inducing oxidative stress and inflammatory responses, thereby participating in hepatocarcinogenesis. Furthermore, exposure to nitrogen dioxide may a…
Ozone	48	0.981	0.56	(O-)(O+)=O	Ozone (O₃) is a strongly oxidative gas. Studies have shown that O₃ exposure can significantly increase oxidative stress levels in liver cancer cells and induce lipid metabolic reprogramming, including enhanced lipogenesis and suppressed fatty acid oxidation (9). In addition, O₃ can regulate pro-tumor signaling pathways such as PI3K/Akt and NF-κB through ROS-mediated signal transduction (10), and …
Sulfur dioxide	64.06	0.786	0.6	O=S=O	Sulfur dioxide is one of the major atmospheric pollutants and is generated during volcanic eruptions, industrial production, and the combustion of fossil fuels, including coal, petroleum, and natural gas. Sulfur dioxide can promote DNA damage and chronic liver injury by inducing oxidative stress, inflammatory responses, and mitochondrial dysfunction, thereby participating in hepatocarcinogenesis.…
Sulfur trioxide	80.06	0.354	0.52	O=S(=O)=O	Sulfur trioxide (SO₃), as a highly reactive gas, can be rapidly converted into sulfuric acid in vivo, thereby causing strong acidic and oxidative damage. Toxicological studies have shown that SO₃ and its transformation products can induce tissue injury and cellular dysfunction. In addition, studies related to sulfur oxides have indicated that they may participate in tissue injury by inducing oxid…
Toluene	92.14	0.957	0.88	CC1=CC=CC=C1	Toluene is an aromatic hydrocarbon. Toxicological studies have shown that toluene can generate oxidative stress through cytochrome P450-mediated metabolism, particularly via CYP2E1, leading to reactive oxygen species production and lipid peroxidation, thereby causing hepatocellular injury (13). Occupational exposure studies have also shown that long-term exposure to toluene can result in abnormal…
Vinyl chloride	62.5	0.767	0.91	C=CCl	Cohort studies have shown that long-term high-level exposure to vinyl chloride can significantly increase the risk of HCC-related mortality and exhibits a clear dose–response relationship (15,16). Mechanistically, vinyl chloride is metabolized in vivo by CYP2E1 to generate reactive intermediates, such as chloroethylene oxide, which can form DNA adducts and induce gene mutations, with high-frequen…
NO, nitric oxide; HCC, hepatocellular carcinoma; AP, air pollutant.
References
1	National Toxicology Program: NTP toxicology and carcinogenesis studies of 1,3-butadiene (CAS No. 106-99-0) in B6C3F1 mice (Inhalation Studies). Natl Toxicol Program Tech Rep Ser 434: 1-389, 1993.
2	Koturbash I, Scherhag A, Sorrentino J, Sexton K, Bodnar W, Tryndyak V, Latendresse JR, Swenberg JA, Beland FA, Pogribny IP and Rusyn I: Epigenetic alterations in liver of C57BL/6J mice after short-term inhalational exposure to 1,3-butadiene. Environ Health Perspect 119: 635-640, 2011.
3	Xie Q, Liu S, Li X, Wu Q, Luo Z, Fu X, Cao W, Lan G, Li D, Zheng W and Chen T: Dinuclear zinc(II) complexes containing (benzimidazol-2-yl)benzene that overcome drug resistance in hepatocellular carcinoma cells through induction of mitochondria fragmentation. Dalton Trans 43: 6973-6976, 2014.
4	Park SJ, Lee SK, Lim CR, Park HW, Liu F, Kim SJ and Kim BC: Heme oxygenase-1/carbon monoxide axis suppresses transforming growth factor-β1-induced growth inhibition by increasing ERK1/2-mediated phosphorylation of Smad3 at Thr-179 in human hepatocellular carcinoma cell lines. Biochem Biophys Res Commun 498: 609-615, 2018.
5	Park Y, Shin H, Kim S, Kim JM, Kim JH, Bang DH, Chang KT, Kim BY and Yu DY: iNOS promotes HBx-induced hepatocellular carcinoma via upregulation of JNK activation. Biochem Biophys Res Commun 435: 244-249, 2013.
6	Peng J, Zheng S, Xiao ZX and Zhang SZ: Inducible nitric oxide synthase expression is related to angiogenesis, bcl-2 and cell proliferation in hepatocellular carcinoma. J Zhejiang Univ Sci 4: 221-227, 2003.
7	Odat RM, Hussain HAH, Alshwayyat S, Qasem HM, Marzouk HA, Alghraibah MS, Al-Hasaseen DM, Bani Salameh MM, Itayem A, Shtayat AA, et al: Global air pollution exposure and hepatocellular carcinoma: A systematic review and meta-analysis of epidemiological studies. BMC Public Health 25: 2972, 2025.
8	Chen Y, Pan S, Chin W, Wu CD and Guo YL: Long-term exposure to ambient air pollution and the incidence of nonalcoholic fatty liver disease: A cohort study. Int J Epidemiol 54: dyaf101, 2025.
9	Peng J, Wang S, Wang Y, Yu W, Zha Y and Gao S: Effects of ozone exposure on lipid metabolism in Huh-7 human hepatoma cells. Front Public Health 11: 1222762, 2023.
10	Li J, Zeng T, Tang S, Zhong M, Huang Q, Li X and He X: Medical ozone induces proliferation and migration inhibition through ROS accumulation and PI3K/AKT/NF-kappaB suppression in human liver cancer cells in vitro. Clin Transl Oncol 23: 1847-1856, 2021.
11	Leaffer EB, Jacoby A, Benn E, Hauser WA, Shih T, Dayan P, Green R, Andrews H, Thurman DJ and Hesdorffer D: Associates of stigma in an incident epilepsy population from northern Manhattan, New York City. Epilepsy Behav 21: 60-64, 2011.
12	Agency for Toxic Substances and Disease Registry: Toxicological Profile for Sulfur Trioxide and Sulfuric Acid. Agency for Toxic Substances and Disease Registry (US), Atlanta, GA , 1998.
13	Gotohda T, Nishimura A and Morita K: Immunohistochemical studies on early stage of hepatic damage induced by subacute inhalation of toluene vapor in rats. J Appl Toxicol 29: 505-509, 2009.
14	Sanchez E and Fernandez-D'Pool J: Liver function in patients exposed to a toluene in a hydrocarbon processing plant. Invest Clin 37: 255-270, 1996 (In Spanish).
15	Lotti M: Do occupational exposures to vinyl chloride cause hepatocellular carcinoma and cirrhosis? Liver Int 37: 630-633, 2017.
16	Cicalese L, Raun L, Shirafkan A, Campos L, Zorzi D, Montalbano M, Rhoads C, Gazis V, Ensor K and Rastellini C: An ecological study of the association between air pollution and hepatocellular carcinoma incidence in Texas. Liver Cancer 6: 287-296, 2017.
17	Weihrauch M, Lehnert G, Kockerling F, Wittekind C and Tannapfel A: p53 mutation pattern in hepatocellular carcinoma in workers exposed to vinyl chloride. Cancer 88: 1030-1036, 2000.

## Sheet: SII
Table SII. AP target genes.
1,3-Butadiene	Benzene	Carbon monoxide	Nitric oxide	Nitrogen dioxide	Ozone	Sulfur dioxide	Sulfur trioxide	Toluene	Vinyl chloride	Air pollutants
EPHX1	CHRM5	HSD17B10	TRIM24	HSD17B10	MAPK1	BLM	BLM	TRIM24	GPR35	EPHX1
MPO	TRIM24	BLM	BLM	NFKB1	TRIM24	HSD17B10	TRIM24	CHRM5	HDAC3	MPO
CYP2E1	PTGS1	NFKB1	NR1I2	BLM	PTGS2	TRIM24	NFKB1	CTSD	DPP7	CYP2E1
HPRT1	KLF5	TDP1	NFKB1	TDP1	NFE2L2	NFKB1	CTSD	PTGS1	HPGD	HPRT1
TEC	HSD17B10	APEX1	NOS3	APEX1	NFKB1	CTSD	DPP9	NR1I2	TEC	TEC
TDP1	CTSD	TRIM24	PLAU	TRIM24	CTSD	CLK4	HSD17B10	KLF5	CHRNB2	TDP1
HPGD	APEX1	NOS3	SPHK1	ALOX12	NR1I2	CSNK2B	NR1I2	TDP1	CSNK2A2	HPGD
CSNK2A2	NFKB1	NR1I2	NFE2L2	DPP9	HSD17B10	NFE2L2	NFE2L2	CHRM4	HSD17B10	CSNK2A2
APEX1	BLM	CTSD	NPC1	GLRA1	ADORA2B	NR1I2	DPP8	GSTP1	APEX1	APEX1
BTK	RORB	PSMB1	CYP3A4	GSK3B	CHRNA1	SLC6A5	APEX1	TLR8	F13A1	BTK
CDK7	CHRM4	ADORA1	CTSD	SLC6A5	CDK1	CDC25B	CHRNA1	HSD17B10	BTK	CDK7
FYN	TLR8	CLK1	PIK3R1	PIK3R1	GLRA1	GLRA1	GLRA1	ADAM10	TGM2	FYN
F13A1	FPR1	KLF5	GLRA1	NR1I2	GPR35	DPP7	CSNK2B	GPR55	PSMB2	F13A1
HDAC3	NR1I2	DPP8	APEX1	PSMB1	CDK5	DPP9	FPR2	NFE2L2	CCNE1	HDAC3
VDR	NFE2L2	DPP9	MELK	CHRNB4	DPP9	FPR2	PSMB1	NFKB1	KDR	VDR
TRIM24	ADAM10	SLC6A5	CSNK2B	RAB9A	CSNK2B	SCN3A	CHRNB4	FPR1	TYMP	TRIM24
STAT1	GPR55	GAK	HSD17B10	SLC2A1	SLC6A5	CHRNB4	MAPK1	RORB	CDK7	STAT1
CLK4	CHRM1	RORB	CHRNB4	CSNK2B	MDM4	TRPA1	CDK5	GPBAR1	XDH	CLK4
GPR35	TACR2	PTGS1	NOX1	CDK5	KLF5	CES1	CDC25B	FCGRT	EGFR	GPR35
MAOA	PSMB1	TNIK	SCN3A	CTSD	CHRNB4	CDC25C	GPR35	TNIK	CLK4	MAOA
NR1I2	GSTP1	CDC25C	PTPN11	CES1	GPR55	CXCR4	DPP7	APEX1	AHCY	NR1I2
EGFR	FYN	NFE2L2	DPP9	CXCR4	BLM	PTPN11	SLC6A5	CDC25C	DPP9	EGFR
NFE2L2	ITK	ANPEP	CLK4	CLK4	SCN3A	NPC1	CDC25C	ANPEP	STAT1	NFE2L2
TGFBR2	CAPN1	CLK2	CDK1	NFE2L2	CDC25B	RORB	ANPEP	MAOA	CES1	TGFBR2
SAE1	ANPEP	ERN1	DPP7	PLAU	NOS3	PSMB1	CYP19A1	MAPK11	ERBB2	SAE1
PTGS1	SLC6A5	STAT1	SLC6A5	NPC1	DPP7	TLR4	PTPN11	STING1	NT5E	PTGS1
KLF5	KDM6B	TFPI	CHRNA1	CYP3A4	CLK1	CHRNA1	NPC1	FYN	NR1I2	KLF5
SLC6A5	PRSS1	NR3C2	APLNR	NR1H3	FPR1	TDP1	GRIN1	GBA2	FYN	SLC6A5
PSMB1	SERPINE1	SCN3A	QRFPR	GPR35	CYP3A4	CYP3A4	KLF5	PRCP	PSMB1	PSMB1
RXRA	CDC25C	QRFPR	STAT1	S1PR3	ALOX12	CLK1	TLR4	GRM5	CA3	RXRA
FGFR1	STAT1	CDC25B	CDK5	CHRNA1	PIK3R1	PIK3R1	CLK4	MME	NTRK3	FGFR1
PSMB2	STING1	FPR2	F13A1	PTGER1	PSMB1	FPR1	NOS3	CSNK2B	RXRA	PSMB2
CDK5	FPR2	CSNK2A2	DPP8	RORB	CDC25C	METAP2	RORB	HTR2C	PDGFRA	CDK5
CCNE1	MME	GPBAR1	FPR1	S1PR5	NOS2	DPP8	CYP3A4	FLT1	PTGS1	CCNE1
NFKB1	CSNK2B	DCUN1D1	CDC25C	FPR2	CCNE1	DUSP3	STAT1	HDAC8	PDGFRB	NFKB1
TTR	LGALS3	DCTPP1	PSMB1	HPGD	GSK3A	PTGER2	KLK7	ERAP1	PNMT	TTR
CLK1	GBA2	NTRK3	FLT1	TOP2A	METAP2	GPR35	NR3C2	HTR7	TRIM24	CLK1
DPP8	ERAP1	FPR1	CFTR	CCNE1	GRIA2	QRFPR	FPRL2	PSMB2	KLF5	DPP8
NTRK3	CASP6	PRCP	LGALS3	NR4A1	CDK2	BMP2K	CFTR	ITK	CLK1	NTRK3
FKBP1A	GRK5	CHRNA1	PRSS1	FPR1	PDGFRA	KLF5	PIK3R1	DCTPP1	GRK5	FKBP1A
NOS3	KCNA5	TERT	CDC25B	FLT1	FPR2	C1S	MIF	KCNK9	NPBWR1	NOS3
GRK5	TOP1	ADAM10	MIF	KLF5	CLK4	NOS3	ALOX12	HRH3	PIK3CG	GRK5
YES1	CHRNA1	TOP1	S1PR4	NTSR2	DUSP3	FPRL2	FPR1	DUSP3	MAPK1	YES1
HRH3	CDC25B	ADORA2B	NR3C2	RXFP1	APEX1	GRIN1	SCN3A	CHRM1	MAOA	HRH3
CA3	MDM4	CSNK1D	RORB	ADAM10	QRFPR	ADORA2B	CES1	DRD1	DPP8	CA3
XDH	SAE1	PSMB2	TERT	CYP2A6	NR3C2	SAE1	DUSP3	SERPINE1	NFE2L2	XDH
FGR	HRH3	GRIA2	KLF5	GRIA2	PRCP	NR3C2	ADAM10	PSMB1	NAMPT	FGR
PDGFRA	SLC2A1	TLR8	S1PR5	DPP8	PTGER1	HTR3A	METAP2	CSK	CACNA1H	PDGFRA
CTSD	PRCP	DUSP3	NTSR2	NR3C2	STAT1	KLK5	TRPA1	TRPA1	TYRO3	CTSD
CSK	ACVR1B	AAK1	HPSE	GRIN1	CFTR	KLK7	ADORA2B	SLC2A1	APLNR	CSK
TGM2	THRA	PDE3B	MAPK1	SOAT1	S1PR2	CDK5	DCUN1D1	SLC6A5	ITGB1	TGM2
TNIK	P2RY6	PSMB9	GRIA2	PTGER2	TLR8	PRSS1	PDE11A	HDAC4	CDK1	TNIK
NR3C2	PSMB9	GHSR	FPR2	KDM6B	DPP8	TERT	PSMB9	CACNA1B	PKMYT1	NR3C2
CES1	PTPN2	SAE1	PTGER2	CDC25C	PTPN11	STAT1	FLT1	GGPS1	PLAU	CES1
MAP4K4	GPR6	GLRA1	ADAM10	CASP6	TOP1	ATG4B	S1PR5	GABRA1	HDAC2	MAP4K4
ADORA1	NOX1	PTGER1	S1PR3	SCN3A	CHUK	SLC2A1	GRIA2	NOX1	ANPEP	ADORA1
TMPRSS6	TBXAS1	KIF11	DUSP3	DPP7	TOP2A	ADAM10	TOP2A	PTPN2	SCN3A	TMPRSS6
DPP9	TDP1	PDE11A	TOP1	CNR1	FLT1	PTPN2	CASP6	PIN1	NFKB1	DPP9
CLK2	AKR1C2	KDM6B	PSMB9	KDR	HDAC5	F2R	PTGER1	KLK5	PTPN2	CLK2
FPR2	CDK5	ACVR1	TYMP	P2RY6	TLR4	PLAU	NR4A1	GLS	CLK2	FPR2
MAP2K1	PSMB2	HRH3	RPS6KA5	PSMB9	NTSR2	MAPK1	NTSR2	PDE11A	GRM5	MAP2K1
ACVRL1	NQO2	HSD11B2	NR4A1	METAP2	TYMS	CACNA1B	GSK3A	TACR2	TLR8	ACVRL1
TBK1	CSK	CHRNB2	TRPA1	AVPR1B	TBXAS1	FCGRT	GPR55	TGFBR2	VDR	TBK1
RORB	NTRK3	F13A1	SCN2A	PTPN2	GRIN1	PTGER1	SAE1	GRK5	HSD11B2	RORB
SCN3A	MAPK1	HDAC11	SLC2A1	TOP1	P2RX4	GSK3A	PTGER2	SAE1	S1PR2	SCN3A
CDK1	TGFBR2	NOX1	PDE11A	MDM4	AHCY	CLK2	CLK1	KAT6A	ACACB	CDK1
STK3	CACNA1B	AKR1B1	BMP2K	AURKB	DOT1L	PDE11A	BMP2K	TBXA2R	NOS3	STK3
CAPN1	LNPEP	CDK5	GRIN1	PTGS2	KLK7	PSMB9	PTPN2	NTRK3	FPR2	CAPN1
ERBB2	MARK4	CASP6	NTRK3	DUSP3	PTPN2	IRAK1	F13A1	CYSLTR2	PTK2B	ERBB2
PIK3CA	MAOA	CHRNB4	MTOR	S1PR4	PDE11A	NTSR2	SLC2A1	NOS2	ADAM10	PIK3CA
ERN1	HPRT1		METAP2	EPHB2	S1PR5	S1PR5	P2RX7	TOP2A	HDAC7	ERN1
PTPN2	CYP1A2		CASP6	PDGFRA	AVPR1B	GRB2	TOP1	KCNA5	APP	PTPN2
AHCY	CYP2E1		CES1	GPBAR1	HPSE	ADORA1	F2R	CDC25B	PIK3CB	AHCY
MAP3K11	NQO1		ADORA2B	KLK7	PSMB9	TOP1	QRFPR	CDK5	CSNK1E	MAP3K11
APLNR	TNF		TLR4	MARK4	CYSLTR2	CDK1	AVPR1B	TOP1	QRFPR	APLNR
IRAK1	MMP2		CLK1	TMPRSS6	ATG4B	LGALS3	PDGFRA	ACE	AKR1B1	IRAK1
TYRO3	PRKDC		MDM4	AXL	GHSR	ANPEP	GHSR	FPR2	TTR	TYRO3
ADORA2A	GSTT1		C1S	TTR	NTRK3	HRH3	AKR1C2	ACHE	GPR6	ADORA2A
PTK6	MPO		KLK7	CDK1	AKR1C2	SLC9A1	MDM4	CYP2E1	ZAP70	PTK6
HSD11B2	TP53		XDH	NOX1	SAE1	KDM6B	ATG4B	MAOB	MAOB	HSD11B2
ANPEP	CYP2F1		DOT1L	CACNA1H	IL8	SCN2A	ZAP70	UPP2	SLC6A5	ANPEP
RXRB	GSTM1		TNK1	PDE3B	TNF	CYP2A6	ERAS	CAT	FGFR1	RXRB
HDAC2			WDR5	CCR2	SFTPA2	AKR1C2	SACS	TH	HDAC5	HDAC2
GUSB			NOS1	TYMP	SFTPA1	NR4A1		PRKCG	DUT	GUSB
ACACB			NOS2	SAE1	GSTM1	SLC35B3		PRKCA	HRH3	ACACB
GRM5			EDN1	PSMB2	ZNF410	UST		HBA2	SCD	GRM5
CYP3A4			KNG1	RPS6KA6	SERPINE1	SLC35B2		SCN4A	CETP	CYP3A4
GAK			IL1B		TPTE	HS2ST1		HBB	PDE4B	GAK
FPR1			GUCY2D			SLC35B1		TAAR1	ATG4B	FPR1
JAK3			GUCY2C			ID2		SLC22A3	MAPK3	JAK3
ADAM10			GUCY2F			SFTPC		SLC22A2	PRCP	ADAM10
SLC9A1			NPR1			SUOX		RGS8	PIK3CA	SLC9A1
ALOX12								RGS4	P2RX4	ALOX12
MAP2K2								NLRP1	PREP	MAP2K2
DPP7								MPI	ALPL	DPP7
PRCP								KIF11	CDK5	PRCP
CYP2A6								KCNN4	FGR	CYP2A6
UGT2B7								HMBS	BCR	UGT2B7
CHRNB2								CES2	TFPI	CHRNB2
TOP2A								CES1	CXCR6	TOP2A
RXRG								DBH	P2RX7	RXRG
PRKCZ								CTBP2	CDC25B	PRKCZ
GSTP1									SRC	GSTP1
TLR8									AKR1C2	TLR8
CHUK									CHRNA1	CHUK
TYMP									GRIA2	TYMP
BMP2K									CSNK2A1	BMP2K
AVPR1B									EZH2	AVPR1B
ZAP70									DRD1	ZAP70
PDE3B									ERN1	PDE3B
CHRNA1									HTR2C	CHRNA1
F2R									ACVRL1	F2R
LGALS3									KLK7	LGALS3
PRSS1									FBP1	PRSS1
MCHR1									PSMB5	MCHR1
KDM6B									PRMT1	KDM6B
S1PR5									MAP3K11	S1PR5
DRD1									IL23R	DRD1
EIF4A3									CHRNB4	EIF4A3
TACR2									MAP2K1	TACR2
FPRL2									RORC	FPRL2
PTK2B									UGT2B7	PTK2B
BCR									S1PR4	BCR
S1PR4									RORB	S1PR4
QRFPR									MINK1	QRFPR
RPS6KA5									HDAC10	RPS6KA5
ALPL									BRDT	ALPL
AAK1									PDE9A	AAK1
FBP1									FABP4	FBP1
AKR1B1									ITGB3	AKR1B1
CSNK1E									MELK	CSNK1E
CHRNB4									PDE4A	CHRNB4
ADK									PKN1	ADK
									HDAC11	CHRM5
									SCN4A	HSD17B10
									EGLN1	BLM
									PTPN11	CHRM4
									SAE1	GPR55
									FPR1	CHRM1
									SIRT1	ITK
									CD38	SERPINE1
									GLRA1	CDC25C
									TGFBR1	STING1
									BACE2	MME
									SERPINE1	CSNK2B
									KDM4A	GBA2
									TMPRSS6	ERAP1
									FPRL2	CASP6
									TDP1	KCNA5
									CDC25C	TOP1
									TGFBR2	CDC25B
									JAK2	MDM4
									ABL1	SLC2A1
									SCN5A	ACVR1B
									DHODH	THRA
									AR	P2RY6
									LNPEP	PSMB9
									PTGER1	GPR6
									KDM6B	NOX1
									NR3C2	TBXAS1
									P2RY4	AKR1C2
									NOS2	NQO2
									ADK	MAPK1
									ITK	CACNA1B
									CYP2E1	LNPEP
									TP53	MARK4
									XRCC1	CYP1A2
									ERCC2	NQO1
									GSTT1	TNF
									ALDH2	MMP2
									GSTP1	PRKDC
									ADH1B	GSTT1
									MPG	TP53
										CYP2F1
										GSTM1
										TFPI
										GPBAR1
										DCUN1D1
										DCTPP1
										TERT
										ADORA2B
										CSNK1D
										GRIA2
										DUSP3
										GHSR
										GLRA1
										PTGER1
										KIF11
										PDE11A
										ACVR1
										HDAC11
										PLAU
										SPHK1
										NPC1
										PIK3R1
										MELK
										PTPN11
										FLT1
										CFTR
										MIF
										NTSR2
										HPSE
										PTGER2
										S1PR3
										NR4A1
										TRPA1
										SCN2A
										GRIN1
										MTOR
										METAP2
										TLR4
										C1S
										KLK7
										DOT1L
										TNK1
										WDR5
										NOS1
										NOS2
										EDN1
										KNG1
										IL1B
										GUCY2D
										GUCY2C
										GUCY2F
										NPR1
										GSK3B
										RAB9A
										CXCR4
										NR1H3
										RXFP1
										SOAT1
										CNR1
										KDR
										AURKB
										PTGS2
										EPHB2
										AXL
										CACNA1H
										CCR2
										RPS6KA6
										GSK3A
										CDK2
										S1PR2
										HDAC5
										TYMS
										P2RX4
										CYSLTR2
										ATG4B
										IL8
										SFTPA2
										SFTPA1
										ZNF410
										TPTE
										HTR3A
										KLK5
										FCGRT
										GRB2
										SLC35B3
										UST
										SLC35B2
										HS2ST1
										SLC35B1
										ID2
										SFTPC
										SUOX
										CYP19A1
										P2RX7
										ERAS
										SACS
										MAPK11
										HTR2C
										HDAC8
										HTR7
										KCNK9
										HDAC4
										GGPS1
										GABRA1
										PIN1
										GLS
										KAT6A
										TBXA2R
										ACE
										ACHE
										MAOB
										UPP2
										CAT
										TH
										PRKCG
										PRKCA
										HBA2
										SCN4A
										HBB
										TAAR1
										SLC22A3
										SLC22A2
										RGS8
										RGS4
										NLRP1
										MPI
										KCNN4
										HMBS
										CES2
										DBH
										CTBP2
										NT5E
										PDGFRB
										PNMT
										NPBWR1
										PIK3CG
										NAMPT
										ITGB1
										PKMYT1
										HDAC7
										APP
										PIK3CB
										DUT
										SCD
										CETP
										PDE4B
										MAPK3
										PREP
										CXCR6
										SRC
										CSNK2A1
										EZH2
										PSMB5
										PRMT1
										IL23R
										RORC
										MINK1
										HDAC10
										BRDT
										PDE9A
										FABP4
										ITGB3
										PDE4A
										PKN1
										EGLN1
										SIRT1
										CD38
										TGFBR1
										BACE2
										KDM4A
										JAK2
										ABL1
										SCN5A
										DHODH
										AR
										P2RY4
										XRCC1
										ERCC2
										ALDH2
										ADH1B
										MPG

## Sheet: SIII
Table SIII. HCC target genes.
HCC-DEGs	HCC-GeneCards	HCC-WGCNA	HCC target
SLC38A9	TP53	ZMAT5	MBD1
ZMAT5	ATM	MBD1	KIF15
GNAO1	MET	COLQ	ANLN
ANKRD2	BRCA1	KIF15	UBE2I
MBD1	MSH6	SLC12A4	TFG
FAM43A	PALB2	TRAPPC9	HSP90AA1
COLQ	CHEK2	STAT5B	FLCN
KIF15	BRCA2	MINDY1	EIF2B2
MEIS3	MSH2	CBX7	ATIC
TRAPPC9	BRIP1	ANLN	DMAP1
NIPSNAP3B	APC	RNH1	TPD52L2
FBXO2	MLH1	PQBP1	NF2
ARHGAP18	CTNNB1	KCTD7	VPS52
MINDY1	PMS2	KEAP1	ASXL1
MAP4K3	BARD1	CEP170B	CABIN1
ANLN	EGFR	CEP85	RECQL5
MVD	PIK3CA	CYB5R1	PELP1
TTC22	RET	EOLA2	GAPDH
GNL3L	C11orf65	SGO1	GSDMD
GASK1B	PTEN	KAT7	MAN1B1
PQBP1	CDH1	CHFR	AKR1B10
KCTD7	CDKN2A	E4F1	C1orf35
CEP170B	BRAF	L3MBTL2	RETREG1
GABRA3	KRAS	MARK4	PES1
PASK	ERBB2	UCKL1	CDC25B
SMARCC2	AKT1	PGAP6	PEX11B
CEP85	MIR7-3HG	RSU1	EXO1
ALDH3B1	TERT	EXOSC1	MDK
ATP6V0E2	CCND1	PSMA7	RPS18
LRRCC1	SMAD4	UNKL	HSPB1
CEP295	HULC	RNF187	ERCC3
CYB5R1	VHL	UBE2I	FEN1
EOLA2	H19	MEA1	DVL3
C5orf58	HRAS	DDX41	PLK1
SGO1	HNF1A	CPSF1	LASP1
KAT7	FLCN	TFG	CSNK1D
STK17A	MIR21	ATP5MC1	PTPRA
CHFR	PTCH1	RAD23A	TPX2
PDK1	FGFR3	SLC25A23	MCM3
ZSWIM5	CDC73	DEPTOR	CSTB
E4F1	STK11	STK39	RAE1
MT2A	RB1	HSP90AA1	MCM4
MARK4	MALAT1	FLCN	CDK5RAP3
METTL4	EPCAM	PGBD1	BBC3
UCKL1	PVT1	ARFGAP1	FANCF
NPHP3	CASP8	MRPL9	FGFR4
SAA2	TSC2	ACTR5	CCDC137
TSPYL2	HNF1B	DUT	MAPKAP1
ALOX12	KIT	SLC35B1	LMNB2
EXOSC1	STAT3	EIF2B2	KDM1A
NKD1	NRAS	KLHDC10	MEPCE
SCARA3	MYC	ABHD12	UCN
UNKL	HOTAIR	TBCB	CENPA
EIF2S2	FGFR2	CYB5B	UIMC1
HHATL	TGFBR2	ADH5	SMARCB1
ADSS2	TUG1	MRPL22	CALR
ZNF491	GAS5	TMEM138	CUL7
MORF4L2	TSC1	MAST3	ITGB5
RNF187	AXIN1	TBC1D16	SPATS2
SLBP	ALK	ATIC	ESS2
UBE2I	NOTCH1	SAPCD1	AXIN1
MEA1	HEIH	FBXW9	KNSTRN
DDX41	ARID1A	PNPLA6	NEK2
CPSF1	ESR1	TBC1D10B	ACACA
ZNF544	FH	OSER1	XPO5
NRGN	KRT7	DMAP1	HSPA4
TFG	AXIN2	NARF	TUG1
SLC35F2	MTOR	SCAP	TNFRSF18
BCL6B	LOC126862571	ZBTB14	ERCC2
SINHCAF	NTRK1	TPD52L2	RNF43
ATP5MC1	SRC	NF2	NUP107
PSIP1	UCA1	CUEDC2	HMGB2
DEPTOR	NBN	NUP210	SND1
LAIR2	FGFR1	MTERF3	TARBP2
ENPP4	BAP1	VPS52	EHMT2
STK39	MEG3	PHLDB3	ALYREF
HSP90AA1	MIR145	PKN1	SMUG1
FMO1	PBRM1	ASXL1	PFAS
FLCN	RAD50	CABIN1	TUBG1
PGBD1	MIR221	SH3BP5L	TDP1
CACNA2D3	PDGFRA	TMCO3	VPS33A
PTPRG	MIR34A	ATP6AP1	APEX1
LRRC10B	SMO	RECQL5	CBX2
NCBP2AS2	NF1	PELP1	EED
HACE1	MIR18A	GAPDH	ZNF461
ARFGAP1	CDKN1A	KIF18A	TPM1
MRPL9	MIR155	ARPC1A	POLR1H
ACTR5	MIR214	TBC1D31	MELK
DUT	VEGFA	TMX2	LAMC1
SLC35B1	CDKN2B-AS1	GSDMD	PRPSAP1
CPPED1	HIF1A	CUL9	MLST8
EIF2B2	MIR122	HIGD2A	GFER
PTBP3	MIR31	EIF2AK1	RAD51
USP54	CDKN1B	ALG6	MCM5
ME2	MIR125A	MAN1B1	GRAMD1A
GATA2	PPARG	CCDC124	CDC6
ABHD12	SMARCA4	TMEM178A	BIN1
TMEM243	MIR17	AKR1B10	ATAD3B
TBCB	NEAT1	SOCS7	IKBKG
TMEM88	CCAT1	RILPL1	HTATIP2
ZNF391	MIR141	HMGN4	PRRC2A
MRPL22	CDK4	TMEM150A	RAD51D
MAST3	MIR200B	GNAZ	CAPNS1
PCDHB8	MIR195	ZNF766	TRIM65
NIBAN1	GPC3	PHF21A	PPP1R13L
GNAS	MIR200A	SKA3	RBCK1
TBC1D16	MIR30A	TMEM234	EIF3H
ATIC	KRT20	PDLIM1	MBOAT7
SAPCD1	MIR143	C1orf35	DEPDC1
IMPDH1	EGF	RETREG1	XRCC2
PRKDC	MIR205	MED18	BCL9
FBXW9	MUTYH	DENND4B	PPP2R1A
VIL1	MSH3	PES1	TRMT2A
FADD	MIR126	SAFB	LPCAT1
H2AZ2	POLE	PSMD1	TOP2A
ZNF718	MIR148A	CDC25B	SF3A3
PNPLA6	ERBB4	BNIP1	DDX39A
TBC1D10B	MIR222	RPL7L1	RPS15
OSER1	AR	PSMC6	PTOV1
ZNF467	SDHB	GOSR2	G6PD
DMAP1	DLC1	ZBTB3	MPV17
RAB11FIP5	MIR146A	VAMP5	TTC36
FRAT2	MIRLET7C	PEX11B	ARHGAP1
KDELR3	MIR139	EXO1	COPS5
NARF	IDH1	LAS1L	MAN2B1
DDX31	CCAT2	HOMEZ	ADRM1
ZCCHC7	MIR29A	PHF7	BARD1
GPR158	TGFB1	MRM1	OGT
TPD52L2	MDM2	CAMKK2	EGLN2
NF2	CYTOR	MDK	PSMB5
NUP210	NTRK3	DPP3	UBE2T
ACSM5	XIST	RPS18	RFC4
MTERF3	MIR22	DDX49	MRGBP
VPS52	IGF2R	HSPB1	MAD2L1
DBP	RAF1	ERCC3	SLC25A47
B4GALNT2	MIR203A	THAP7	RFC3
RNF2	NKX2-1	GIPC1	TXNRD1
CDC42EP5	SNHG1	CRTC2	ZKSCAN1
ZNF296	SPRY4-IT1	WDR45B	ATXN2
PHLDB3	BCL2	MLLT1	BAG6
TRMT12	MIR223	NOC4L	PTTG1
FGD6	GNAS	SNU13	AKIP1
RPS8	MEN1	MAN2C1	IQGAP3
HHIPL2	MIR27A	MARCHF8	USF1
NPL	AFP	DNM2	PDPK1
PKN1	MIR30E	FBXL8	RUVBL2
ASXL1	EP300	SAC3D1	SF3A2
STRC	HOTTIP	NCAPH	SMYD5
CABIN1	CDKN3	FEN1	HDAC5
ALDH6A1	KRT19	DVL3	SART1
SH3BP5L	MIR15A	SZT2	MACROH2A1
TMCO3	MIR200C	ZNF500	CHTOP
DDX27	POLD1	AP4M1	XRCC3
PABPC1	MIR20A	GIGYF1	ENAH
DUSP26	MIRLET7G	PLA2G6	CFL1
ATP6AP1	LINC-ROR	MED25	TATDN1
RECQL5	MIR191	STK11IP	DDX56
SECTM1	MAP2K1	DNASE1L1	CPNE1
HIGD1B	MIR182	TMEM250	EIF2D
ZNF879	YAP1	ZNF530	HRAS
FAM199X	MIR19A	JADE2	TRMU
EID3	FAS	PLK1	KCNJ5
PALB2	NFE2L2	PAQR8	GPSM2
HS6ST1	OGG1	LASP1	CCNB2
MYOF	PCAT1	PPFIA3	CS
KDM8	MUC1	MED8	CKS1B
PELP1	BAX	CSNK1D	IRF5
GAPDH	MIR142	PTPRA	CCNA2
COL15A1	CDKN2B	MRPS16	WDR5
TDGF1	MIR183	NIF3L1	TIA1
KIF18A	KDR	CYSRT1	HAX1
ARPC1A	MIRLET7D	ISY1	RHOC
TBC1D31	IDH2	TPX2	BSG
BDKRB1	EGFR-AS1	NCKIPSD	NUP43
RAB34	AFAP1-AS1	PSAP	RBM4
GSDMD	MIR224	HEXB	CIRBP
CUL9	GHET1	MCM3	ADIPOR1
HIGD2A	MIR99A	ZCRB1	DAXX
DPH6	PTGS2	B4GAT1	TXN
TMED3	MIR23A	CRELD2	SF3B2
TSACC	FASLG	ZNF101	SPON2
ELOVL3	FBXW7	GKAP1	WDR77
ALG6	MIR34C	SZRD1	MUS81
MAN1B1	IL6	CSTB	FOXK1
CCDC124	MIR150	TNIP1	ACLY
CHST2	SETD2	C19orf53	DAPK3
SACS	KCNQ1OT1	MRPS10	AGER
TMEM178A	MIRLET7B	RAE1	RPS10
PHF19	NTRK2	ARL15	CDK1
AKR1B10	HNF1A-AS1	ANKDD1A	RAD18
SOCS7	MIR93	C18orf21	BANF1
RILPL1	PDGFRL	C17orf113	E2F2
HMGN4	MIR23B	SPPL2B	TRIM27
TMEM150A	MIR181A1	VHL	NHP2
GNAZ	MIR215	MCM4	SLX4
CNOT6	MIR96	MRPL40	PRKAB1
DDX10	MIR29C	PIDD1	AGO2
ZNF766	BANCR	CDK5RAP3	TYK2
PHF21A	BIRC5	MIER2	PRMT1
SKA3	AXL	B3GNTL1	YEATS2
ATP11A	MIR106B	DMWD	PYGO2
TMEM234	SDHC	HARBI1	AGRN
C1orf35	JUN	ZNF433	MEF2D
RETREG1	PTCH2	BBC3	NFKBIL1
ZFP2	CASC2	MINK1	KIF23
TSPAN5	NPTN-IT1	SMIM20	ABCC5
DENND4B	MIR127	CLTA	SSBP1
PES1	ROS1	APOC2	TACC3
ZNF184	CRNDE	GIT1	ADAM15
AGAP2	MIR146B	DMAC2	USP39
MATN3	ERBB3	SNRPB	CDC37
NEDD1	VDR	SIRT4	AATF
C4orf48	ZFAS1	RFT1	CCNL2
BATF	RAD51D	BCS1L	SUGP2
PSMD1	MIRLET7E	CENPM	ZKSCAN4
CHMP3	MIR338	BBS2	TNFRSF4
CDC25B	FOXM1	IP6K1	FANCI
TIMM17A	MIR26B	FAF1	HNRNPA1
BNIP1	SMARCB1	POLDIP3	CEP55
ACSL4	CD274	ATRAID	TWNK
HMGB3	MIR199B	FANCF	ZBTB17
RPL37	MIR26A1	NTN1	DFFA
ZNF333	DICER1	RNF215	ETV4
HSD17B1	PRECSIT	ATG7	HSPH1
MAGEC2	PTPN11	YIPF1	NAP1L4
ZNF749	MIR216A	CDCA3	SNRNP70
NCAPG2	RAD51C	ZNF48	IQSEC1
GOSR2	NRG1	PPIL2	TTC7A
ZBTB3	TNFRSF10B	BTF3	E2F7
VAMP5	MMP9	MDH2	DNMT3B
PEX11B	MIR10B	TMEM79	PRCC
GM2A	CD44	FGFR4	GINS2
CDH6	MIR25	CEP19	ANXA2
EXO1	WT1	CCDC137	PGK1
CPLANE1	MLH3	NCKAP5L	ZGPAT
EEF2K	MIR199A1	GALNT18	FKBP1A
LAS1L	SOX2-OT	MAPKAP1	PBK
HOMEZ	MIR212	CTC1	PMS2
PHLDA1	MIR148B	SRP9	CD151
MAP3K7CL	ERCC2	LMNB2	MGAT5
RIT1	MIR107	PRKAB2	GRN
MRM1	CCEPR	NDUFA2	IMPDH2
CBLN1	RAD51	KDM1A	NPM1
IER5	RASSF1	TMEM223	NUP85
MDK	SNHG12	PTBP2	CEP131
DPP3	HAGLR	EIF2B4	FAM83D
SLX4IP	MIR210	SLC35C2	TACC2
LRRN2	FHIT	RGP1	AKT1S1
MEP1B	TFE3	MEPCE	RPL38
NCEH1	MIR152	DAGLA	HELLS
RPS18	MIR24-2	APIP	RPS17
DDX49	LOC126806658	TMEM218	ZSCAN21
HSPB1	NORAD	EEF2KMT	PRPF3
ACSS1	MIR130A	CALCOCO1	INPPL1
ERCC3	MIR185	RAB5B	RUVBL1
THBS4	ICAM1	CENPL	TMEM216
DRC3	PRCC	UCN	E2F1
GIPC1	MIR186	PTGES2	LIMD1
PGD	AURKA	TRIOBP	ABT1
MNS1	PANDAR	CENPA	LSM2
CRTC2	MIR373	MAMSTR	MEN1
WDR45B	CHEK1	ANKS3	SMAD2
MLLT1	MAPK1	CCNF	NCOR2
NEK7	CALCA	CENPT	GOLM1
ABCB10	CTNNA1	UIMC1	ARHGEF39
MZT2A	BUB1B	ZBTB39	RAD51C
SETDB1	MIR125B1	REXO2	MAZ
NOC4L	MIR100	SMARCB1	CHEK1
DCK	CASP3	LYSMD4	IRF3
SNU13	MIR374A	C3orf62	SAE1
RNASET2	DDR2	ZNF74	HMBS
LRFN4	TP63	MREG	VRK1
WTIP	MIR494	C14orf93	DNMT1
DNM2	SDHD	PDSS1	KMT2D
H2BC8	MTUS1	CALR	METTL2A
PRR14L	DGCR5	NOL7	OGG1
ERMP1	DANCR	GAR1	EMD
FBXL8	MKI67	ING5	ERGIC3
PPAT	PIK3R1	RNPC3	MAD2L2
SAC3D1	WWOX	TTC23	STT3A
PLEKHG6	ABCC1	EMC2	RBM5
NCAPH	HOXA11-AS	ZNF768	ZSCAN2
NACA	MMP2	ZKSCAN5	NAA40
FEN1	MIR181B1	ASCC2	BRMS1
DTNBP1	FANCC	UBE4B	DPF2
SMARCD3	IGF2	PPP6R1	PSPH
UBALD2	CEACAM5	DERL1	EIF3E
NBPF15	FANCA	AGAP3	WDR4
DVL3	PIK3CG	PTPRM	KIF20A
OTUD7B	MUC16	ZNF182	RACGAP1
CCL20	MIRLET7A1	EXOC4	PSMC4
CNIH2	CDK6	PPP1R12C	TCF19
SZT2	TNF	SURF6	CIP2A
ZNF500	MIR324	STOML2	CCNE1
RASL12	ING1	ZDHHC8	IGBP1
MPZL1	IFNG	CUL7	MZF1
CCM2L	MIR140	ACAD8	PA2G4
AP4M1	PCNA	ENSA	MAP2K2
GIGYF1	MIR424	BABAM2	LAMA5
PLA2G6	XRCC1	GTSE1	NPLOC4
MED25	CBR3-AS1	INPP5E	LIG3
KNL1	EZH2	ITGB5	FTSJ3
STK11IP	MIR151A	WDR25	ITGB3BP
PALLD	MIR320A	GET3	MTA3
DNASE1L1	MIR98	ZNF107	CAD
FOXS1	CDK2	UNC119B	RBM10
TMEM250	RARB	H4C8	WWP2
ZNF530	LINC00261	PARP16	RAB11FIP4
JADE2	JAK2	SPATS2	SAP30BP
PLK1	RHBDF2	TAF5	BAP1
PDZK1IP1	PGR	ESS2	WASF2
ZFAND2A	MIR181C	TLE2	SIRT6
PAQR8	CCNE1	SHROOM1	STIM1
DIRAS1	IL2	TIMMDC1	UBAP2L
LASP1	NFKB1	TSEN34	MSH2
WSCD1	VIM	FAM193A	ILF3
PPFIA3	MMP1	AXIN1	AURKA
WDR75	CXCL8	KNSTRN	SDHAF1
EIF5A2	CASC15	HIC2	MYCBP
SUSD1	PTENP1	NEK2	UPF3B
CHST12	MIR204	MTFR1	NCSTN
CSNK1D	BMPR1A	ACACA	CENPF
BRCA1	MIR132	MAST2	HSF1
PTPRA	HFE	LDB1	USP22
MCMDC2	WRAP53	ZBTB12	UFC1
CKS2	MIR301A	CMTM4	CPQ
NIF3L1	BLM	XPO5	RBM39
MDC1	MIR128-2	SERF2	OLA1
CYSRT1	CREBBP	TMEM80	PPP1CA
PPIC	FGFR4	CHST14	CDK7
ZDHHC13	NKILA	CRAMP1	SRRT
ISY1	FLT1	RNF181	SEC13
TPX2	MIR181A2	UBA5	DLGAP5
CUL2	MIR137	ATRIP	SYMPK
NCKIPSD	MIR196A2	RABL6	NPRL2
SHBG	MIR22HG	HSPA4	UCK2
ITGB1BP2	LNCRNA-ATB	LLGL1	SMURF1
CCL23	NUTM1	TUG1	TRIP13
FAM217B	ITGB1	SLC38A7	TCERG1
HEXB	GSTM1	HPS6	GPS1
MCM3	TP53COR1	TRAPPC3	CCDC34
ICAM2	RIOX2	TUBGCP2	HIF1AN
EHD3	MIR197	TNFRSF18	SUV39H1
PSMD9	PCAT29	GRB10	RBX1
C5orf63	GLUL	CWC15	HTRA2
H2BC11	LOC110806263	TRIM32	STMN1
E2F6	LOC126806659	KNOP1	HPX
AGFG1	GSTP1	RAB2A	HGS
B4GAT1	PRKN	MLXIP	DIS3L2
CRELD2	LRRC56	ARF3	ZFPL1
PARVB	SNHG20	ZNF266	KAT2A
NEK11	TP73	DCLRE1B	MYBBP1A
ZNF101	SNHG6	PIEZO1	MTA1
GKAP1	PCBP2-OT1	COA1	TRADD
ANXA11	PRKAR1A	ERCC2	PRPF6
UTP15	HEPN1	PNISR	IRGQ
C15orf39	IRF1	RNF43	IDUA
CSTB	PAX8	STX4	GMNN
SMPD2	MIR101-1	PON2	PUF60
VPS13B	BCL2L1	CYSTM1	ASPSCR1
RAPGEF3	MIR192	TOR2A	TYMS
ULBP2	ZEB1	CNTROB	ERBB3
C19orf53	SERPINA1	NOP10	POLG2
MTMR1	PEG10	HMG20B	CDC25C
ABCG1	MIR30D	NUP107	RPTOR
EP400	MIRLET7A3	FARSB	NGDN
RAE1	ABCB1	NSMCE2	LIG1
NEB	SDHA	NELFB	NQO1
ARL15	SNHG16	HDAC11	PIN1
ZNF835	PMS1	SEMA7A	PPOX
SLC7A5	SNHG15	MARCHF2	HJURP
MT1H	MIR27B	CYB561D1	AURKB
COL4A2	SRA1	HMGB2	ABCF1
SIGLEC7	SMAD2	RDH13	USP21
ANKDD1A	KEAP1	CNNM4	CCT6A
C18orf21	TCF7	SND1	CCT4
CHCHD6	POLR1HASP	EXOSC7	POU5F1
SRP19	IFNA1	CDC45	TRIM28
C17orf113	IL1B	NAT14	CCT3
INTU	MIR133B	C20orf96	ECT2
PDGFA	DRAIC	DELE1	PKMYT1
RASSF3	MIR125B2	ME3	RMI2
MOSPD3	GATA3	RNF7	PAK4
SPPL2B	HGF	CABLES1	NAA10
KRBA1	FALEC	PPIE	DNASE1
GIPR	STARD13	RBSN	KCTD13
C6	IGF1R	RCC1	PARP2
TMEM178B	ZEB2-AS1	RFC5	NUAK1
MCM4	MIR9-1	TARBP2	ANP32A
ZNF888	MIR106A	DGCR2	THRA
TASOR	ATR	CLNS1A	MESP1
PIDD1	SERPINB3	EHMT2	PEX6
CDK5RAP3	MIR375	CEACAM19	TALDO1
CAPG	GFOD3P	TAF12	E2F4
ZNF506	MIR193A	KATNIP	KIF11
MIER2	KRT18	PPIL3	SMARCA4
ZNF131	TERC	ALYREF	WRAP53
B3GNTL1	MIR136	CDCA2	VBP1
TMEM150B	WT1-AS	EXOSC10	MCM6
SH3RF2	MIR219A1	SMUG1	PRDX1
DMWD	TGFA	PFAS	RBM42
RAB15	SOX2	C17orf80	SENP3
HARBI1	PLAU	TUBG1	CCNE2
ZNF433	SKP2	TDP1	FOXM1
BBC3	ZEB1-AS1	GDI1	MTHFD1L
MAL2	MIR296	PIH1D1	PABPN1
CLTA	MIR30C1	VPS33A	POLA2
GTF2E1	KLF6	BUD31	CDK5
APOC2	TYMS	ZNF841	MORC2
TAF10	MIR149	SUV39H2	CLDN7
FICD	MIR483	C14orf119	BCL2L12
ITGA3	CDK12	MFSD5	FUS
GIT1	HOXA-AS2	ARHGEF18	MECP2
DCTN5	KRT8	APEX1	MTHFR
SNRPB	XRCC3	ZBTB8OS	MAPK3
BMF	MRE11	COMMD9	SHC1
EPPK1	FANCD2	ZFP64	NDC80
SIRT4	AKT2	CBX2	POLD1
EPB41L1	NME1	TTLL1	HYOU1
RFT1	TUSC7	MRPL48	ACIN1
BCS1L	KMT2D	YIF1A	HDAC1
CENPM	CYP1A1	KLHL22	COPS6
IP6K1	MIR10A	TEFM	HM13
RAPSN	SLC5A5	PITPNM2	SQSTM1
ZNF324B	MIR331	TMEM199	EFTUD2
FAF1	IGF2-AS	EED	PFKFB4
POLDIP3	PRKACA	MLLT6	PYGB
APOLD1	RASA1	ZNF461	INTS3
NR2F6	SYP	RPAP1	TRAF3
RPSA	MIR16-1	ZNF526	AGK
SUN1	CD82	PSMC3IP	FANCD2
ATRAID	MIR30B	VPS29	MCRS1
DPP4	MITF	ATXN7L3	PRKCSH
ZNF780B	MIR500A	TPM1	FBXO31
FANCF	CASP9	PTPN23	XRCC4
INKA2	CXCR4	RGL3	AIMP2
RNF32	SPP1	NIT1	GPC3
RNF215	MIRLET7A2	MTHFSD	CDC20
DBN1	ALB	SFT2D2	POLR2L
RPS15A	MIR24-1	SPCS2	RNF8
S100A12	NNT-AS1	BUD13	ILF2
C1orf216	TNFSF10	DPCD	PTRH2
CDCA3	SLC2A1	CTDSP2	U2AF2
ZNF48	MAPK8	POLR1H	BUB1
SYNGAP1	FTX	STK36	TMEM8B
PPIL2	GLI1	TRIT1	ROBO1
LARS1	BCYRN1	H2AC13	NEU1
TMEM79	IL12RB1	PACC1	NR2C2
FGFR4	FLT4	NACC2	STIP1
CEP19	CASC11	OS9	EPHB4
DNPH1	SNHG7	BRAT1	OXA1L
CXCL17	KIF1B	HROB	RPS7
CCDC137	JAK1	PLRG1	MED19
SIRPG	RAD51L3-RFFL	TEAD2	MYBL2
RPL10L	CHGA	ZNF707	BRF1
BBS7	PARP1	IMPA1	RBFOX2
SSUH2	CTTN	APBA3	DNMT3A
MYH4	MIR138-1	MELK	TRAF2
NCKAP5L	MIR451A	DSN1	GPI
SMC2	MIRLET7I	RBM4B	MICA
NRARP	RELA	TIMM50	TCF3
CYP2B6	HOXB13	TELO2	RHBDF2
CD28	MIR34B	ANO10	SIRT7
GALNT18	IL10	EPDR1	CBX8
MAPKAP1	CAV1	NUP35	KMT2B
SRP9	BMP6	CENPI	TIMELESS
PCDHB6	TFDP1	CCDC78	MYH14
LMNB2	PPM1D	CHCHD3	SRRM2
GJA1	DNAJB1	CSTF2	DMTF1
USHBP1	LINC00665	CCDC61	SGSH
PRKAB2	STAT1	RPL30	SNAPIN
ELOC	ENG	PEX5	LTO1
NDUFA2	PRKDC	SRPRB	CDKN2C
KDM1A	ABCC2	ORMDL3	CHAF1A
PTBP2	LUCAT1	OPA3	EGFL7
EIF2B4	PRC1-AS1	THAP3	TCOF1
SLC35C2	MIR503	NCLN	CTTN
RGP1	THADA	RNF26	CACYBP
MEPCE	FER1L4	LAMC1	RPS19
DAGLA	MIR497	PRPSAP1	CENPE
FAM184A	MT-CYB	ZNF436	SRPK1
ATP2A1	MECOM	LTA4H	NXF1
APIP	XPC	SUPT3H	MAPK12
PNO1	BAIAP2-DT	PRKRIP1	DDX39B
TSSC4	PTK2	SPACA9	HMMR
KIF3C	NFKBIA	ZSWIM9	MCM7
CDH24	CASC9	RPAIN	PPIA
EEF2KMT	MAPK3	MLST8	RPN2
PARP10	HOXA13	ZNF300	TCHP
FOXRED2	ENO2	GFER	TUBA1B
ZNF672	HCCAT5	SSBP4	EFNA4
TRIM6	SMAD3	DDRGK1	SETD1A
CENPL	MIR9-2	TESK1	MAU2
APLF	VEGFC	ZNF213	IRAK1
UCN	FGF2	RAD51	KIF2C
GTF2H2	PTH	HARS1	PSMB4
PTGES2	CPS1-IT1	HOOK2	AKR1C3
DENND5A	FAH	MARS1	DHX30
P2RY13	ERCC1	SAMD4B	MTBP
AIDA	SOD2	TSEN15	EIF6
MDM1	TCF7L2	STPG3	XRCC1
TREX2	SPRTN	FLVCR1	BRD9
TRIOBP	TYMP	MCM5	SF3B4
TP53RK	TWIST1	AHI1	UHRF1
BLMH	MIR499A	WIZ	PTP4A3
CENPA	MST1R	GRAMD1A	UBE2S
TTC39A	MIAT	INO80E	GLB1
MAMSTR	NOTCH2	CDYL	BRIP1
ANKS3	E2F1	GTF3C5	NAPB
CCNF	KRT5	ZNF576	BAK1
CENPT	MIR511	CDC6	NSD1
NEURL3	WRN	POLR2C	UTP6
UIMC1	MIR335	OCIAD1	RALY
ZBTB39	MAPK14	SLC25A29	EZH1
RUFY2	MIR103A2	BIN1	CALM3
SMARCB1	SNAI1	MLX	TERF1
RELT	MMP7	ZNF646	HDAC4
RFX3	MIR15B	THOC1	BCR
SMAD5	DLEC1	ATAD3B	CD2BP2
SYNGR1	SP1	MCUR1	RECQL4
LYSMD4	MYB	VSIG10	RRAS
DUSP28	SMAD7	C2orf72	UBA1
CYRIB	CA9	TRABD	CSNK2A1
C3orf62	MIR345	POLR3F	FANCE
ZNF74	LINC00941	KIFC3	DAP3
MREG	GREM1	SUFU	SEPTIN9
ELAPOR1	SHC1	COPE	PRKCA
C14orf93	RECQL4	IKBKG	H1-0
SPRTN	DNMT1	BLOC1S2	BID
FKBP10	MGMT	VCP	DHX16
MEIS2	AMACR	HTATIP2	PLEC
PDSS1	MMP14	TIMM29	CLIC1
CHD7	CTLA4	LSM6	GGPS1
WWC3	ESR2	WDR62	NME1
CALR	FOXE1	ACTR8	RRM2
DNAJC2	ZEB2	ZNF473	BUB1B
NOL7	GSK3B	PRRC2A	XRCC6
SPECC1	ERCC4	RAD51D	CACTIN
GAR1	MSR1	CZIB	TRIM25
VANGL1	CARD8-AS1	CYB561A3	CCNB1
C15orf48	TMEM51-AS1	RPL22L1	RARS1
ALKBH6	LINC01138	MRPL43	NSUN5
ING5	PDCD1	CAPNS1	RBM6
RNPC3	SNHG3	MDH1	CPSF7
TTC23	IGF1	ATP5F1B	TKT
CPED1	PKM	DNAL4	PIAS3
SERHL2	DHFR	WDR81	PCNA
VPS37D	MIR32	CCDC97	AREL1
SLC2A5	MIR370	PLPPR2	PCLAF
PROSER1	MAP3K1	PLIN5	UBTF
EMC2	ELAVL1	C6orf226	CKAP4
ZNF768	HHCM	TRMT10B	PRPF31
TLCD3A	FOXO1	SLC52A2	TSC1
ZKSCAN5	ATRX	NARS2	SAFB2
FSTL4	C20orf204	PSMG2	SMARCD1
ATP8B2	RSPO1	SEMA4G	DAB2IP
SLITRK3	BSG	NGEF	RIOX1
CCN1	MIR100HG	NUDCD3	VDAC1
CHST3	HNF4A	TRIM65	CASP8
CDK14	EPAS1	SFSWAP	XAB2
TP53I13	LGALS3	DARS2	KIFC1
PPP6R1	HEPFAL	PPP1R13L	RPS6KB2
AGAP3	ERCC5	P3H1	FOCAD
SLC16A8	CDX2	MBD2	NUDT1
PTPRM	MIR429	SNRPC	PEX2
ZNF182	NF2	BET1L	RING1
EXOC4	KILH	PIGQ	MKI67
FASTKD3	POU5F1	TRMT1L	CHD4
DENND2B	ZNF350-AS1	TADA1	MCM2
ODAM	AKT3	MRPS27	HSP90AB1
PI15	HTATIP2	RBCK1	DVL2
PPP1R12C	PRAL	EIF3H	RPL31
SURF6	PTCSC2	OARD1	RXRB
SFN	CXCL12	MBOAT7	CDKN2A
OBI1	MIR33A	DEPDC1	GSK3A
SOX9	TIMP2	XRCC2	UBE2C
CUL7	CDKN1C	SGO2	MVP
OLFML2B	MIR26A2	BCL9	EZH2
ENSA	MIR124-1	TCTN3	SYP
SLC43A2	CYP17A1	PPP2R1A	TNFSF15
BABAM2	TTF1	PSMA3	BAX
SYT8	IFI27	NCAPD2	TP73
ADAMDEC1	SRGAP1	PDRG1	HNRNPH1
GTSE1	SERHL	RABIF	RBM14
INPP5E	TGFBR1	CRYBG2	P4HA2
ITGB5	SERPINB5	PLGRKT	CD58
CYP26A1	MTDH	TRMT2A	DDIAS
DLX5	PDGFRB	LPCAT1	FAM111A
CPSF6	TSHR	BRI3BP	TFCP2
GET3	MCL1	TOP2A	ABL1
DDX46	MIRLET7F2	VPS16	UPF1
FOXF2	GSTT1	POU6F1	FLOT1
ZNF107	MIR372	LRRC39	HDGFL2
UNC119B	TINCR	PAN3	ITGA6
GCNT3	ANXA2	ACOT8	MAPK11
MYH3	MUC2	PEX12	TK1
SLC6A8	FANCE	ANAPC5	BRCA2
H4C8	CDH2	DPAGT1	NCAPG
SPATS2	ABCB4	SF3A3	H2AZ1
TAF5	CCNB1	MRPL51	FRAT1
H2BC17	GAS5-AS1	AP3M2	TBX19
ESS2	URB2	DFFB	ASF1B
KDM5C	FOXA1	C1GALT1C1	CCT8
TLE2	HMGB1	DDX39A	UNC45A
CEP350	CCNA2	RABL2B	MDM4
SHROOM1	EPIST	TBC1D13	NCAPH2
TMEM151A	CYP2A6	TBC1D17	PSMD2
NAA80	PPP2R1B	CCDC17	CDC25A
CTNNA3	MIR211	STX10	PKD1
SLC16A14	TLR2	IPO13	LUC7L3
NOL11	RAC1	RPS15	HSPA5
PGAP1	PLAUR	ZNF444	CTNNA1
TIMMDC1	MIR342	PTOV1	NELFA
TBC1D10C	ABCB11	GPATCH1	NR6A1
CD63	ACTA2-AS1	DDX51	CDKN3
VN1R1	XIAP	RELL2	TSC2
ATXN1L	C14orf132	HNRNPUL2	CAMK2G
TSEN34	CERNA2	NATD1	PDCD5
FAM193A	KRT14	PLPP1	RPS24
AXIN1	FANCG	CENPQ	MAGED2
GPR150	MIR181B2	RPUSD1	WFS1
KNSTRN	LOC126862549	DBF4B	MAP3K11
HIC2	TIMP1	FITM2	TAB1
FTH1	HSP90AA1	HAUS1	LAMTOR5
CELSR2	TRIM24	AMFR	EEF1D
NEK2	HSPB1	ZNF280D	NACC1
MAGEA12	MAGEA1	NME3	NASP
CARNS1	RAD51B	AAMP	NOP16
ACACA	CERNA3	CDK5RAP2	EWSR1
NAV3	MTHFR	C6orf62	LEF1
LAMA3	RECK	ZDHHC3	NFKB2
MAST2	ZNF674-AS1	ERCC6L	RPL23
UQCR11	CDK1	NAGPA	BIRC5
MRPL24	AOC4P	UBE2M	RASSF1
BTN2A2	CCDC6	MLH1	KIF14
ZNF710	PRPSAP1	G6PD	RPL17
LDB1	SLC67A1	PCBP4	TTK
TTI1	HMMR	DYNLL1	TTF1
ZBTB12	MAP3K20	RHPN1	PSME3
VPS50	FANCL	ZNF839	DTL
FCN2	NOS2	MPV17	ATAD2
KIF2A	MIR486-1	RTL10	G6PC3
CMTM4	FANCM	TTC36	RRM1
XPO5	LINC01018	SFR1	DAZAP1
RTKN2	XPA	CAPN12	ATXN2L
GLI1	MIR31HG	ARHGAP1	SKA1
HNRNPA2B1	BMI1	UGT2B11	SNRPA
VMA21	ALDH2	DDX17	GNS
TMEM80	EPHB4	GNA12	MAP2
CRAMP1	LRP1B	NKAP	SMO
ZNF497	MIR628	COPS5	GRB2
RNF181	TOP2A	MAP4	PUS1
NHLRC1	TLR4	UGGT2	METTL21A
RPL39L	PCNA-AS1	VPS9D1	SSRP1
ASIC1	CYCS	CUTA	KNTC1
RAMP1	MIR124-2	MAN2B1
SOX2	INS	ADRM1
ATRIP	G6PC1	UFD1
PACSIN1	MYCN	PPM1G
RABL6	ENSG00000216663	ATP6V1E1
HSPA4	MAGEA3	PFDN6
LLGL1	CYP2E1	BARD1
TUG1	ABL1	FAM50A
KDM3B	SLC7A6	YJU2
SLC38A7	SERPINE1	NUDT2
RTN1	AOPEP	OGT
PPP1CC	MIR328	EGLN2
MNT	JAG1	STXBP6
PLEKHH3	LINC00511	MGST3
TNFRSF18	CTNND1	TRMT61A
ATL3	NAT2	SLC38A6
MAP10	STEAP4	PSMB5
CNIH3	NR2F1-AS1	NISCH
MELTF	NDUFA13	HNRNPH3
TRIM32	RNF43	UBE2T
TRIM24	RUNX3	PLXNA2
HEATR1	CKS1B	MRPL15
KNOP1	MIR1-2	ZNF784
SLC4A2	TIMP3	GPANK1
CSPP1	CDH4	ARF5
GRK3	GAPDH	MAP2K7
MLXIP	RHOA	SNRPD2
RBM34	HSPA5	PTGFRN
LAD1	LINC00473	TSG101
GLYAT	SOX4	RFC4
APH1B	SNAI2	MRGBP
ARF3	LINC01133	PIGL
FAM216A	ERCC6	PCIF1
ZNF266	GIHCG	NCDN
DCLRE1B	MMP3	SLC29A2
PIEZO1	FN1	MAD2L1
COA1	PIK3CB	TP53I3
ERCC2	HSPA6	FAM168A
AKR1B1	MIR330	GNB2
PNISR	ERCC3	PIGG
PPP1R3D	LOC129997612	NDUFAF2
RNF43	MIR193B	SLC25A47
STX4	NTHL1	MRPS21
PON2	SOX9	TEAD3
ESCO1	FKSG49	BCAT2
DYNLRB1	ASPSCR1	WRNIP1
CYSTM1	LINC00173	CSNK1G2
PHF20L1	ODC1	THOC6
TOR2A	LINC00673	AMBRA1
MIOX	IGFBP3	C2CD2
CNTROB	JUP	FBXL20
RAB3IP	SLC25A13	CAMTA2
NAE1	CLDN1	IL23A
FAM131A	SST	RFC3
PRAF2	KLF4	GPAA1
PCDHB13	IL6R	TRNAU1AP
NUP107	F2	DEDD
PPP1R14D	DNMT3B	IFT80
FARSB	TG	TXNRD1
NSMCE2	FOXP3	PCED1A
NELFB	PROM1	TMEM126A
HDAC11	DBH-AS1	DGKQ
SLC39A4	CFLAR	ZKSCAN1
SEMA7A	DKK1	DNAJB2
ST6GALNAC4	ENO1	INTS4
PPAN	ABCG2	PIF1
MARCHF2	LINC01419	RANBP10
CYB561D1	TMEM127	TDP2
HMGB2	CAMTA1	LRRC37B
RDH13	LINC00589	ATP6V1D
ARHGAP45	SQSTM1	ZNF263
CNNM4	HPSE	QRICH2
OLFM2	EZR	THEM4
GID8	BRD4	TICRR
SND1	GPT	ATXN2
INTS13	NQO1	BAG6
CDC45	LINC00210	ATAT1
NAT14	FASN	FOXP4
SP5	NCOA4	EIF3B
USP27X	MINPP1	KIFC2
C20orf96	RNASEL	NTAN1
ME3	CYP19A1	PTTG1
RIPK2	CYLD	ZNF485
CNOT9	LINC00460	SH3GLB2
LGALS3	FOXD2-AS1	CYTH2
FUCA2	MAPKAPK5-AS1	UQCRQ
STX3	PFKFB1	NIPAL3
ADAM10	LINC00974	AP2A1
RCC1	MIR128-1	AKIP1
RFC5	MIR339	HIRA
TARBP2	SDHAF2	BUD23
CD163	HLA-A	IQGAP3
RACK1	NPM1	RAB5C
RBM28	LMNA	FAAP100
DGCR2	UFC1	DDA1
ATP5MF	EGILA	CHMP2A
SPARCL1	MIR340	ARHGAP22
EHMT2	BUB1	AKR1B15
NONO	MIR378A	POMT2
CEACAM19	MIR452	SNTA1
CLHC1	JPX	HNRNPC
MPRIP	JAK3	USF1
TBX10	MIR498	TAF6L
H1-2	TSG101	ADGRL1
KATNIP	DPYD	TMEM184B
PPIL3	MIR584	WIPI2
NAP1L1	WNT5A	PDPK1
CNR1	RAB4B-EGLN2	PIGU
KIAA1549	MIR423	ZNF814
HDAC8	SOCS1	RUVBL2
ABHD3	TPX2	PFDN1
ASF1A	MIR202	SF3A2
ALYREF	CRP	SMYD5
CDCA2	FGL1	MYO19
CDK2AP1	LINC02055	SUPT16H
TMEM145	DNMT3A	TTC31
SMUG1	IGF2BP2	QARS1
PFAS	MIRLET7F1	NELFCD
GMPS	CASP10	RHOBTB2
SLC22A15	MAP2K4	SSH3
ZFR	MIR184	HDAC5
C17orf80	LINC00926	FAM111B
TUBG1	MME	LMBR1L
TDP1	GPC3-AS1	AARS2
DZIP3	PTCSC1	SART1
BRD3	MIR425	RBM25
PLAC8	SLC17A5	DYM
GDI1	DIP2C-AS1	NDRG3
PIH1D1	MIR361	FBF1
ZNF423	PTPN3	RPIA
EMX1	PDIA3P1	ASAP3
VPS33A	KRTAP5-AS1	MACROH2A1
GMIP	HSPA4	ZNF687
BUD31	LDC1P	DUS2
ZNF841	FAM83A-AS1	ARFIP2
WDR54	VLDLR-AS1	CHTOP
KCNQ4	ARC	UBL4A
SUV39H2	RPS20	CAMLG
CHPF2	SUFU	OSBPL2
SMOX	THBS1	C6orf136
HMGB1P1	SLC25A27	XRCC3
MFSD5	IFNA2	TRPM4
ARHGEF18	MIR377	ENAH
APEX1	SFRP1	CFL1
TFAP2A	LINC00601	TMEM94
ITGA2	LNCBRM	TTC13
ZBTB8OS	SERPINB4	TATDN1
PDLIM7	RNF6	CCDC107
KCNJ11	EPHA2	EIF3K
COMMD9	BCL10	ABHD17A
CHGB	TFEB	PSMG3
DGKH	MIR4435-2HG	ZNF589
ZFP64	LOC111589215	POP1
POC1A	CDH3	GOLGA8A
GORAB	MIR95	MCM10
CBX2	CCNH	DDX56
ATN1	LGALS1	KCTD2
SATB2	MIR92A1	SHARPIN
TTLL1	CFTR	MFF
LY6E	MCU	TTC27
ZNF397	OVCH1-AS1	MSL1
KLHL22	KCTD13	TOM1
MMP1	NCAM1	CPNE1
MAPK13	BMP2	CCDC163
ZNF260	MIR491	ZNF282
TEFM	WEE1	VPS11
ZNF121	DDR1	ZNF862
PITPNM2	MMP13	EIF2D
TMEM199	MUC5AC	FAM200B
SPTAN1	CEACAM3	CDIP1
EED	ELAC2	GATD1
MLLT6	TNFRSF10A	IKBIP
ARFGEF1	ICAM4-AS1	COMMD5
ONECUT1	DAPK1	TRAM1
ZNF461	CCL2	RSAD1
RPAP1	MIR130B	HRAS
BPNT2	EPO	LRRC14
ZNF526	CD34	TRMU
PSMC3IP	MIR302A	ZFAT
ATXN7L3	EGR1	PRX
TPM1	CCND3P1	SEC61A1
PTPN23	PKHD1	ING4
KIF5B	MT1DP	ZNF517
RRAGD	RPS6KB1	UBQLN4
ZFP30	FOXO3	MFSD11
RGL3	MAD1L1	KCNJ5
MTHFSD	IRS1	TMC7
SFT2D2	CECR7	TPRA1
SPCS2	MMP11	FAM133B
NDUFB9	CD40	SLC35E1
MIS18BP1	PLK1	IDH3B
KCNIP2	FOS	PHF1
BUD13	MICA	GBP2
DPCD	PRKCA	SHANK3
ERFL	CDH13	TMEM126B
TMEM52B	MTA1	GPSM2
POLR1H	GLT1D1	CC2D1A
STK36	MIR371A	CCNB2
H2AC13	WNT1	MMS19
PACC1	MUC6	GMPR2
NACC2	PPP2R1A	ZNF696
PPP1R2	AREG	CS
BRAT1	HLA-DRB1	COPS7A
HROB	LDHA	RNPEPL1
TEAD2	ETV6	CKS1B
ZNF707	FABP5P3	ZSCAN25
NDUFAF8	GRB2	ZDHHC12
APBA3	SHH	IRF5
MELK	ANXA5	MKKS
ZNF681	EPHX1	ZNF251
DSN1	MIR485	TXLNA
RBM4B	PHB1	CCNA2
SARM1	NCOR1	WDR5
TIMM50	HTR2A-AS1	LRP10
C2CD3	MAGEC2	TIA1
PHTF2	MIR502	SPC24
CTNNBIP1	LINC00383	CD59
TELO2	MAPK10	POLE2
ANO10	RNY3	HAX1
ITLN2	THY1-AS1	DRG2
VSIG4	ULK4P2	DMPK
EPDR1	FANCF	SMARCD2
MAPRE1	LINC02027	VAC14
CENPI	ANGPT2	SSR2
CCDC78	PALLD	CLK1
LOXL1	FOSL1	HAUS4
CHCHD3	NARF-AS1	RHOC
CSTF2	NR1H4	BSG
CCDC61	MIR29B2	RAMAC
ERO1B	IATPR	SNRPA1
DNM1	UGT1A1	STAT6
BOC	HDAC1	TSC22D4
MID1IP1	NEK2	NCBP2
GLS	INSR	TMEM161A
LMTK2	CXCL1P1	TUT1
PAK1IP1	NPC1	BRD3OS
RPL30	SFPQ	NUP43
ZNF503	MXI1	RBM4
KLRF1	FOXCUT	CIRBP
ZNF737	HMGA2	DGKZ
SRPRB	CTAG1B	GAS2L1
OPA3	ATP7B	PIEZO2
THAP3	HDAC9	ADIPOR1
RPS28	HK2	DDX54
NCLN	IL4	EBNA1BP2
CYP19A1	IL2RA	N6AMT1
ZBTB41	BECN1	DPH2
GRPR	CEBPA	NFE2L1
RNF26	AHR	ZNF414
NCK2	LINC00554	NSMCE1
LAMC1	CLDN7	NELFE
PRPSAP1	CBS	ATG16L2
WDR5B	EPB41L4A-DT	PRIM2
ZNF436	ARG1	DAXX
CRYBA2	CCND2	MFHAS1
FBLN1	CLU	CCDC174
SUPT3H	SIRT1-AS	CUX1
DNAJC14	RARA	NDUFB3
MED15	KDM6A	ANKRD10
CLEC14A	ABCC3	MAGOH
REG1A	ARNT	USP31
CYP2C8	EPHB2	BTBD2
PRKRIP1	CCR7	TARBP1
SPACA9	CREB1	COMMD3
ZSWIM9	ITGA6	TRNT1
CKAP5	XRCC2	C19orf25
TTC5	FADD	BCAP31
NCF2	ETS1	RBM3
MLST8	MIR103A1	MIS18A
ZNF300	ROCK1	L3HYPDH
GFER	CA3-AS1	ILKAP
SSBP4	LDLR	TXN
ZGLP1	ALDOB	TET3
CAPN2	CYP1A2	RPS6KL1
PITX1	LINC01234	SF3B2
TESK1	MIR376A1	PSMD13
ITPR1	MIR144	PRICKLE3
ZNF782	CDR1	PACS2
ZNF213	SEPTIN9	C1orf43
RAD51	SEMA6A-AS1	MYO9B
PCSK5	CP	HSPBAP1
PRDM15	MIR590	SPON2
HOOK2	ING3	MED10
COL5A2	PCAT7	WDR77
MARS1	MIR92A2	AIMP1
NANOS1	CYP1B1	CTDSP1
SAMD4B	SIRT1	C2orf76
ABHD17C	MIR367	MUS81
MEOX2	KLK3	NUDT5
FIBCD1	ZNRF3	MED27
EGLN3	SOS1	FOXK1
ZNF570	MIR99B	KLHL21
FAM117B	NFIB	MRPL27
CCL13	CD24	ACLY
CACNG4	TRIM33	LYAR
TSEN15	XRCC6	DAPK3
STPG3	NRP1	STK25
FLVCR1	MVP	SUPT5H
MCM5	MIR675	CWF19L1
WIZ	YBX1	ITPKA
GRAMD1A	CTSD	ZNF668
C15orf62	SDC1	AP2B1
INO80E	MIR206	ZNF30
TGS1	IL18	FAM53C
CDYL	SOD1	AGER
SEZ6	MAX	TMEM201
UTP25	RHOC	ZWINT
COLGALT1	TGFB2	MARCHF9
RNF113A	EGOT	SAMM50
GTF3C5	BAK1	ZNF671
FDPS	PINX1	LRRC20
CDC6	DPP4	NOL6
MTHFD2	MIR196A1	RPS10
ACRBP	ABCC4	CDK1
CNN1	TCF4	AGPAT3
MOV10	EIF4E	ELP6
RNASEK	MIR495	CCDC138
ZNF14	GJB2	RAD18
SLC25A29	CCN2	LRRC37A3
BIN1	PIK3CD	BANF1
ZNF646	NONO	E2F2
CYP2C19	GGT1	REEP4
ELP1	SOCS3	TRIM27
SCLY	TYR	POLQ
THOC1	AKR1B10	DTYMK
YPEL1	MIR302C	MRPL13
RAPGEF6	ABRAXAS1	GAA
ATAD3B	GJA1	TMEM50A
LGALS8	MIR542	NHP2
MCUR1	GRP	SLX4
ABRAXAS1	HMOX1	NDUFA1
VSIG10	PDPN	PRKAB1
ZNF430	IL6ST	TRAPPC12
SMG8	LEP	ILRUN
ZNF875	PCM1	GINS3
YWHAZ	ITGAV	AGO2
POLR1G	CYP3A4	LAMTOR2
TRABD	MIR199A2	MRTO4
POLR3F	PPARA	IMMT
ADA	PIGR	PPM1F
ATR	CCND3	TOM1L2
GDPD1	BIRC3	PPP2R5D
KIFC3	TFAP2A	GTPBP2
CDK6	CADM1	RNF121
COPE	RECQL	UBXN2B
MPP7	ADAMTS9-AS2	TYK2
BOLA3	CD80	GLMP
ZNF428	FLT3	HNF1A
PAFAH1B3	FENDRR	PDE6D
CYTH3	ID1	DALRD3
CRLF1	MIR532	ZNF580
IKBKG	KITLG	PKNOX1
PTDSS1	MIR124-3	ZHX3
ZNF587B	ANXA1	TBL3
FAM118A	KMT2C	ACD
VCAN	IDO1	YAE1
NOP56	S100A4	SEC16A
GIT2	TOP1	EXOSC4
STEAP1	IL1RN	PRMT1
HTATIP2	SPARC	SYNGR2
DPYSL4	IGF2BP3	DDOST
AGXT2	RXRA	ZNF616
AQP10	ENPP2	MSTO1
TIMM29	SSTR2	FOXD2
RTL8C	ACTB	WDR46
WDR62	CSF3	PDCD2L
NOTCH1	IL17A	LUC7L2
ZNF473	HLA-G	SLC35E2B
TMEM64	TJP2	YEATS2
PRRC2A	STMN1	VMAC
RAD51D	SLC19A1	TMEM179B
CLDND2	HSP90B1	PYGO2
CYB561A3	CEACAM1	SFI1
FZD6	NANOG	STOML1
RPL22L1	ILK	MROH1
CAPNS1	HIF1A-AS2	AGRN
ITGA7	CDC25A	ANKRD52
MLANA	NCOA3	TIMM44
IL6	CEBPB	FBRS
RIPOR3	EIF1AX	TMEM175
TNFAIP2	CDH17	BABAM1
PSD	TACSTD2	IK
DDX59	ADAR	MEF2D
CADM1	HSPA1A	SLC26A6
GATAD2B	HLA-DQB1	SEC31B
TMPPE	HAND2-AS1	NFKBIL1
PCNT	FGF3	KIF23
PDGFD	PIP	TMEM42
RNF157	PSMD10	ABCC5
DNAL4	BIRC2	ROBO3
RADX	ST14	THEM6
CSRNP1	CCL5	URM1
H3C2	ASS1	PGPEP1
SCML2	IL1A	ARGLU1
CCDC97	MIR637	CIB1
PLPPR2	CSF1R	TMEM186
RBP7	PTHLH	PPP6R2
MFSD4B	FUCA1	SSBP1
RNF115	FSCN1	SMYD2
RPL7	NQO2	ARHGEF11
CDCA7	NOTCH3	BTN2A1
C6orf226	YY1	IFT43
DMXL2	MYCL	ZNF7
GPAT2	ALDOA	IFFO1
GAN	HABP2	CNTNAP1
TRMT10B	MIR134	GOLPH3L
SLC52A2	NBAT1	TACC3
TMEM168	FZD7	PDIA6
BYSL	LAMC2	CXXC1
ACVRL1	AURKB	PDAP1
NGEF	DCTN5	CTSA
CD46	TPR	DCUN1D2
RTCA	MIR455	ADAM15
NUDCD3	PXN	PAXBP1
TOX2	RB1CC1	USP39
TRIM65	NR1H2	DGCR8
SFSWAP	WIF1	RBM22
SLC22A4	MAGEA4	PCGF1
CCDC187	COPS5	CDCA8
CCDC183	GOLGA5	IFT140
DARS2	TP53BP1	NEU3
PPP1R13L	SREBF1	RRP1
HEY1	CLPTM1L	PCBD2
P3H1	TFF1	CDC37
IGFBP3	BLACAT1	LRSAM1
SNRPC	ARID2	DNAJC7
BET1L	ITGA5	AATF
FMNL3	PCAT6	CCNL2
PELI3	HMGA1	WSB1
RBCK1	CCR5	RHBDD3
NIPSNAP2	NSD1	SETDB2
UTP18	CDKN2C	TRIM45
EIF3H	PTTG1	ZNF2
SAA1	PTK2B	SUGP2
ASAP2	ANGPT1	FAM104A
SELENOH	MIR9-3	AP3S1
MBOAT7	TAP1	ZMYND19
DEPDC1	PTPRC	WDHD1
XRCC2	HBEGF	PWWP2B
SGO2	MIR29B1	RPF1
BCL9	LINC00963	TMEM219
SPAG4	ACVR1B	POLR3A
RPL19	FEZF1-AS1	RTRAF
GCNA	MIR432	FRA10AC1
PPP2R1A	CALB2	NRBP1
IL1RL1	MIR135B	ZKSCAN4
ADH4	BID	INTS9
ADGRG7	SULF1	PAM16
EDRF1	MUC4	FOXO4
DUSP23	HDAC2	FRS3
ZNF45	IFNAR2	TNFRSF4
BORA	KRT17	FANCI
NCAPD2	CDC42	POLL
EDIL3	TFRC	BCL2L2
TBX4	CYP2D6	HNRNPA1
DDIT4	APEX1	EML2
POMK	CASP7	NFU1
PDRG1	IGFBP2	OTUB2
MAP3K6	MIR196B	ST3GAL2
RABIF	FBP1	TMEM14C
CRYBG2	CXCR3	DBNDD1
ZNF567	CD36	VPS37C
PLGRKT	MICB	TRAIP
CA4	CHUK	APOO
RO60	SART1	CLASRP
UHRF2	CCN1	ESYT1
KIFAP3	LEF1	MYL5
TRMT2A	TNFRSF1A	NPEPL1
LPCAT1	EIF2AK2	KCMF1
BRI3BP	DIRC1	CEP55
TOP2A	MSLN	SUPT7L
ZNF763	GDF15	CKAP2
VGF	MIR133A1	C11orf68
UGT1A6	UTP6	LETMD1
VPS16	MIF	TWNK
N4BP3	MIR138-2	KLHDC4
LRRC39	BTRC	PSMB3
ACOT8	HSPD1	CRTAP
RPL37A	PEBP1	FIZ1
ANAPC5	AHCY	C1QTNF6
ECD	PRKCD	ZBTB17
DPAGT1	FANCI	DAPK2
MN1	SPINK1	PPIP5K1
SF3A3	SMARCA2	CSNK2A2
MRPL51	ROBO1	ATXN7L2
AP3M2	DIABLO	HIP1R
ZNF669	BAD	DFFA
DFFB	SLC25A47	NAIF1
GTF2I	MIR572	PIP4K2B
ALMS1	CALR	CRELD1
DHDH	MIR154	TFPT
BLVRA	MIR181D	ETV4
UCHL1	CTSB	H2BC12
DDX39A	MIR190A	DHX34
COA7	RBM10	MYO7B
PRTFDC1	TFF3	ACBD6
ZNF35	PIN1	HSPH1
CLTRN	LZTS1	ZMYM3
ZNF227	DLEU1	BAHCC1
TBC1D13	MAML1	TCEANC2
TBC1D17	TKT	RTCB
HAVCR1	RSF1	LYRM4
CCDC17	HLA-B	NAP1L4
STX10	TXN	CHAF1B
IPO13	SLC37A4	QPCTL
GPD2	MIR346	ACTR1B
RPS15	ACTC1	GGA2
PTOV1	VEGFD	TMEM115
GPATCH1	MIR337	SNRNP70
PRRT3	F3	NMNAT1
DDX51	VTN	SPRYD3
RELL2	MTAP	PBX2
HNRNPUL2	SALL4	PDCL3
PLPP1	KLLN	IQSEC1
DEFB132	CASC8	CREB3L4
CENPQ	ALPP	RMDN1
RPUSD1	EGLN3	PFDN4
DBF4B	GZMB	SNRPE
FITM2	DUSP1	TTC7A
LMOD1	PAK1	E2F7
MOB3B	MIR187	FUNDC1
GAREM2	GAS8-AS1	GBA2
MGME1	CLDND1	WDR27
KANK2	EIF4EBP1	DNMT3B
HAUS1	GAST	OSGEP
VPREB3	CD8A	LYSMD1
SQLE	KISS1	RABEP2
CSNK2B	SRD5A2	EXOSC2
NME3	CSNK2A1	PRCC
DCLK2	KDM3A	LENG8
MMP11	LAMA5	WDR13
UQCRHL	PPP2R2A	ZSCAN32
JAK3	CD4	RNPS1
CDK5RAP2	MIR508	PLEKHM1
C6orf62	ADIPOQ	CHCHD5
ERCC6L	ALDH1A1	CNDP1
NAGPA	MIR490	GINS2
GMPPB	CDC25C	CRYGS
ADCY3	CASR	BCL7B
UBE2M	ERC1	EARS2
TDRD10	CHKA	POLR2J
MB	STAT4	SIX5
KRIT1	SERPINF1	PLOD3
SFXN3	SFRP4	VARS1
ZMIZ1	KMT2A	ANXA2
G6PD	MIR574	TSPAN17
PCBP4	EHHADH	PGK1
DYNLL1	FOXA2	PSMF1
LRRN4CL	MAD2L1	NR2C2AP
RHPN1	IQGAP1	ZGPAT
FAM178B	SFRP2	C8orf76
ZNF839	TGIF1	RBMX
UNC5B	MT-TT	INTS1
THSD1	GNA11	ABHD11
FAM161B	PODXL	MON1B
MPV17	ITCH	VAPB
C1QTNF12	ZFHX3	DCAF8
RAN	RACK1	HRCT1
CYP4A22	TGFBR3	EIF2B1
FAM53A	NR3C1	GLRX3
RTL10	AGO2	FKBP1A
TTC36	ITGB4	PBK
C12orf75	GNAQ	RNF216
MAGEE1	ANPEP	ASPM
SFR1	IFNB1	KLF13
ME1	ADH1B	TMEM222
NPIPA1	FAP	SMC1B
ENTPD1	PRC1	PMS2
CAPN12	MMP12	CD151
ARHGAP1	TNFRSF6B	MGAT5
UGT2B11	RBPJ	MTX2
GNA12	EGLN1	SLC4A1AP
NKAP	TRIM27	GTF3C3
COPS5	PAK4	RBM23
SLC26A2	KLRK1	CUEDC1
PAQR5	SMARCE1	COG1
ZNF284	SLC2A2	SNX11
MAP4	METTL3	WDR41
CLIC3	RBBP8	SEC11A
UGGT2	CLDN4	GRN
NUDT14	MYBL1	HDAC3
SOCS3	PRKCI	MYCL
CYP7A1	SLX4	ARHGAP33
DOC2B	LINC00472	TPRKB
SMARCE1	IL7	ZNF16
GLA	MMP10	SCX
CUTA	CD47	POC5
TUBA1A	ACTA2	IMPDH2
COL8A1	IL11	GSS
DIPK1B	CLTC	SAPCD2
ANXA5	MIR545	ERMAP
MDGA1	ACACA	NPM1
PRELID2	PPARD	DPH7
GFI1	PDCD4	SIDT2
DHRS11	MIR28	C9orf40
APOBEC3B	BMP7	CCDC86
MAN2B1	TEK	VPS45
ADRM1	SLC10A1	NUP85
UFD1	BCL2L11	CEP131
DDX20	MIR302B	JMJD8
GREM1	DDB2	TPCN1
PPM1G	MAPK9	FAM83D
ATP6V1E1	LOX	AOC2
PFDN6	SBF2-AS1	MAP3K9
BARD1	KRT1	TACC2
FAM50A	SNHG5	MIF4GD
CAMSAP2	GATA6	SLC9A8
GPR4	NOS3	EIPR1
H2BC5	PSMB8	KIF22
DSTYK	IKBKB	PPCS
NUDT2	AMFR	AKT1S1
CLDN18	PTPN13	APBB3
ZNF320	ADAM12	MRPL45
KIAA1328	PNPLA3	NR2C1
ADGRG1	PTPN1	SNX30
OGT	CD151	CTNS
GPR17	B2M	TMEM198
EGLN2	RBL2	UBE2O
ZNF648	MIR512-1	VAV2
STXBP6	PML	PPP1R37
CALCRL	TAT	SH3D21
TRMT61A	PRDM2	USP5
RTN2	EHBP1	CCT7
GNRH1	CD86	ZNF618
CYYR1	CD46	FAAP24
TDG	MIR663A	EXTL3
TGFB1	WNT3A	SMIM7
BMPER	LAG3	PLEKHJ1
SLC38A6	NOTCH4	BRD8
SMAGP	STAT5B	C19orf44
ALPK3	FGF1	TOMM22
HSPA12B	MDK	TOMM34
RERG	AKAP1	EXD3
NUPR1	LEPR	RIBC2
FXYD5	NR1I2	RPL38
KDM5B	XBP1	EDC3
EPHB2	PLA2G2A	FBXW4
PSMB5	MED1	DNAJB11
NISCH	PARK7	ZNF341
DHODH	MIR615	C17orf58
ZNF426	PECAM1	GPR108
UBE2T	NKX3-1	HELLS
ST6GAL2	NNMT	RPS17
CCDC170	MIR515-1	ZSCAN21
FER	CCNG1	TTYH3
PLXNA2	PANTR1	SLC35F6
EBLN2	MGAT5	LCAT
FABP5	GLS	UBL7
ZNRF3	RMRP	PRPF3
ASH1L	LINC01116	CEP152
CAPN3	MPV17	ORC5
GPANK1	GLB1	UQCRC1
ARF5	EPHA1	N4BP2L2
SNRPD2	RPS6	PLCD1
SLC22A11	NFATC1	THAP8
PTGFRN	MSMB	INPPL1
INPP4A	TF	DNAJA3
RANBP3L	LGR5	MGAT4B
CCAR1	MIR129-1	CINP
LMTK3	DUXAP9	FAM78B
RFC4	HADHA	RUVBL1
MRGBP	CD81	TMEM216
PTCD1	MIR135A1	E2F1
PIGL	ELL2	IMP4
PCIF1	XRCC5	TATDN2
SOGA1	PDCD1LG2	NUBP1
NCDN	CSF2	CHMP5
CSTF3	PAH	POLH
SLC29A2	ABCA1	VPS4A
MAD2L1	NDRG1	MRPL10
GOLGA6L9	KDM1A	NAT9
CHORDC1	PTPN12	LETM1
UBE2A	PSMB9	TAOK2
TP53I3	IL15	H3C6
FAM168A	MAP3K8	SLC36A1
ALPI	MIR217	ARFRP1
ZDHHC11B	MAT1A	LIMD1
DCAF7	EXOC2	ABT1
PLCB3	MIR381	PPP1R7
GSN	BSCL2	FBRSL1
CCDC88A	HAMP	LSM2
VIRMA	PRKCB	CAPS
PCDHB16	EBAG9	MEN1
TMEM184A	SART3	CCDC121
ZNF727	GPI	NKIRAS2
ADM5	VCL	MTMR4
GHRHR	FGF19	FBXO42
PIGG	EWSR1	FLYWCH1
NDUFAF2	STK4	KRI1
DMBT1	GHRL	NADSYN1
CERS2	HAVCR2	VMP1
PRR15	LOC129933707	CLUH
SLC25A47	UGT1A7	AP1S1
REM1	TLR3	EVI5L
MRPS21	CTNNBIP1	SMAD2
CTDSPL	SNORD15A	REXO5
TEAD3	TRRAP	NCOR2
LYPD1	SERPINB2	GOLM1
AFF3	MIR744	SLC46A1
RPL32	KRT10	CEP83
TM4SF5	RUNX2	MRPS18A
BCAT2	POSTN	PYCR2
WRNIP1	AIP	ZNF480
CSNK1G2	PHB2	NT5DC2
THOC6	DVL2	UROS
CDKN2B	MPO	AUP1
MBOAT1	VEGFB	FADS3
CREB3L1	IGFBP1	AGTRAP
ARHGEF1	CIB1	CES2
AMBRA1	ETS2	MYO15B
TMEM45B	F2R	ARHGEF39
BEND5	WNT3	RAD51C
CSE1L	CDC25B	MAF1
P2RX5	S100A8	PTPRF
TINAG	HAGLROS	MAZ
RPL9	CXCL10	SLC25A51
TCAP	CCL20	CHEK1
LFNG	DDIT3	RPUSD4
VNN2	MIR198	MRPL4
IRF2BP1	HDGF	PRR3
RFC3	SPOP	APEH
ACADSB	CXCR2	THTPA
RCC2	SPEN	DUSP12
GPAA1	CD40LG	PTPRJ
TM4SF18	PARD3	IRF3
TRNAU1AP	DLEU2	PLXNA1
IGSF1	SLC7A5	NDUFB6
DEDD	SNHG8	SAE1
IFT80	PLG	TRIM68
TXNRD1	ADAM10	HMBS
BRPF1	MIR605	HMGN1
TBC1D19	RPSA	VRK1
ZNF83	WNT7B	DNMT1
PCED1A	RABL3	UBXN1
DGKQ	POMC	PSMD4
PLD6	LCN2	LEMD2
INCENP	YY1AP1	SNRPD1
ZKSCAN1	APOB	SCAMP2
DNAJB2	LNCARSR	ZBED4
VDAC2	KLC1	KMT2D
INTS4	SLC3A2	METTL2A
PIF1	CTCF	DRG1
TDP2	S100A1	IQCC
LRRC37B	STAT5A	SRP14
DOT1L	RRM2	TLDC2
ZNF263	UCHL1	MRFAP1
ZMPSTE24	GOLM1	NSA2
QRICH2	SASH1	TOMM40
GPR68	IL33	OGG1
THEM4	CSK	TMEM169
RIOX2	BCAS2	EMD
ATP1B3	HMGCR	CDCA5
TICRR	DACT1	CCDC85C
ATXN2	PREX2	TARS2
FAM110A	PAX2	MRPS34
BAG6	CHD1	MRPS22
ATAT1	KAT2B	TAF15
FOXP4	RUNX1	ERGIC3
EIF3B	MIR362	C6orf89
KIFC2	HSPA8	CLK2
ZNF221	HCP5	COG7
POLR2F	MMP8	GABRD
COLEC10	ITGB3	ALG1
ZNF420	ATP8B1	MMP24
HSPA13	TFG	TCEA1
CDC14A	LNCSRLR	ZNF76
PTTG1	IRAK4	DCTN3
ZNF485	MIR501	GNL1
JAM3	MIR7-1	RNF207
MAT1A	MIR582	MTIF2
MACROH2A2	SF3B1	GANC
SH3GLB2	BCR	MAD2L2
PCDHGA2	MIR20B	KAT14
COPG2	KDM4B	TRIM16
CBX1	NTS	FAM172A
RRS1	PYGL	PIGO
BCHE	IL7R	STT3A
CYTH2	MIR188	SCPEP1
TAS2R14	SSTR1	CDK16
ZUP1	CDC6	TIGD1
NIPAL3	PPIG	QRICH1
AP2A1	UHRF1	CMTR1
NOD1	LINC01433	ATPSCKMT
AKIP1	SKIL	RBM5
POLR3C	MBD4	MADD
BUD23	PRKAA1	NUP37
IQGAP3	U2AF1	SLC22A5
RAB5C	HLA-DQA1	IER3IP1
LTBP2	CCKBR	LTB4R
FAAP100	GLI2	ZSCAN2
DBR1	SMYD3	B3GAT3
DDA1	MIR877	CPSF4
NT5C3A	CSF1	ZNF514
DIO2	PGK1	NAA40
CHMP2A	BMP4	STX18
SEMA6B	HIC1	LIME1
TPM2	PDPK1	POFUT2
CD1A	USP48	KMT5C
ECSCR	PCLAF	ATP13A2
ARHGAP22	MIR506	MRPS9
AKR1B15	LAPTM4B	CD320
POMT2	LINC01503	GLE1
STAB2	CASP1	BLOC1S3
SNTA1	FOXP2	LIMK2
UGT2B7	IGF2BP1	ABCF3
USF1	HSP90AB1	PPP1R16A
PPM1M	SFN	BRMS1
EEF1A2	DEK	TMEM109
TPBGL	BCAR1	FAM219A
ADGRL1	TFPI2	PATZ1
ATP1A1	GSTA1	TRMO
TMEM184B	MAGI2	DPF2
TAF4	CXCL9	PCSK7
PDPK1	STAG2	PNN
PIGU	ARAF	MKRN1
ZNF814	E2F3	MED20
RUVBL2	GSTM3	SMARCAL1
DUSP8	EDN1	PSPH
PFDN1	TIAM1	KCTD11
SF3A2	DKC1	POLR3K
SMYD5	EXT1	ZFYVE1
GPRC5D	MCM2	EIF3E
MYO19	ELN	WDR70
SUPT16H	SLC2A3	NFYC
QARS1	GJB1	WDR4
NELFCD	EML4	CCDC12
RHOBTB2	HPD	SLC25A39
SSH3	ADAM17	ZNF234
RAB3B	MIR383	ZNF174
LBHD1	LOC129390903	NDOR1
RBP2	HMMR-AS1	KIF20A
HDAC5	WNT4	YDJC
FAM111B	AMER1	USP20
EDARADD	RMST	RACGAP1
SRGAP2	FUBP1	PSMC4
CYP27B1	TMPRSS2	PNKP
AARS2	EIF2AK3	BOD1
ZNF624	VCP	ZNF335
SART1	GNMT	SMG5
PEX10	FLNA	TCF19
DYM	LIAT1	NDST1
RASGRP3	APAF1	PLD2
RANGRF	FABP1	CCDC159
LRRC56	COMT	CIP2A
NDRG3	RARS1	FBXO44
FBF1	CYP27A1	CCNE1
RPIA	AGER	CLTB
ASAP3	FAM13A	SETMAR
MACROH2A1	RBM39	ATP6V1F
ZNF687	TUBB	TTLL4
GPATCH2L	EPHA3	IGBP1
PARD6G	TEP1	MZF1
RFX5	EIF6	MRPL18
ARFIP2	GPX4	AMZ2
CHTOP	JUND	MVB12B
JPH1	THRB	C1orf131
UBL4A	CAT	ARIH2
ZNF701	POLG	SAP30
CAMLG	CCN4	NSMCE4A
COL6A3	BIRC7	PA2G4
HAUS6	SERPINA3	CENPJ
FMNL2	NEK9	MAP2K2
TCTN2	MNX1-AS1	STRN4
C6orf136	SOD2-OT1	COP1
FBXO41	EEF1A1	LAMA5
XRCC3	PTPRD	NPLOC4
SP4	LASP1	DOLPP1
TRPM4	SP3	TMEM230
PDE7A	CD68	TSR2
C1orf198	BNIP3	CLSTN3
ENAH	POU5F1B	ZNF621
CFL1	NAPSA	BAG2
TMEM94	CXCR1	TSEN54
SEC11C	SFTA1P	PCNX3
NELL2	TTN	LIG3
SLC1A5	MIR19B1	UBE2L3
TTC13	RINT1	MANBAL
TATDN1	MIR16-2	ZFP14
SBK3	MIR365A	LRRC8D
CCDC107	CD276	AIFM2
STK3	ANG	FTSJ3
EIF3K	CCR6	SNX21
INMT	COL18A1	COG2
ABHD17A	ING4	CIAO2B
PSMG3	GBA1	ITGB3BP
RTN4R	ADAM9	NR1H2
MBL2	SEC23B	MTX1
MMP9	H2AX	CYB5RL
SLC17A4	ASTILCS	HS1BP3
ZNF589	BAG1	MTA3
WNK4	MDM4	CAD
ZNF850	LINC00958	RBM10
POP1	PSG2	HPS1
GOLGA8A	MVK	ZNF592
MCM10	GATA2	HEXA
EIF1AD	GUSB	WWP2
DDX56	EPOR	RAB11FIP4
KCTD2	LIN28B	UQCC2
SHARPIN	DUXAP8	PSME3IP1
MICOS10	PTGS1	DPM2
MFF	UMPS	PPP1R11
SNAI2	CCR2	SAP30BP
TTC27	NCL	SHLD3
RINT1	CTSK	RPUSD2
GPR153	G6PD	KCNN2
MSL1	CSNK1A1	RRP9
CPNE1	RRAS2	CBFA2T2
PLAGL2	CSNK2B	SLC6A9
CCDC167	STC1	MESP2
CCDC163	ASCL1	BAP1
AKR1C1	PRL	SLC22A23
MSH6	CCK	PPP2R5B
ZNF282	CSE1L	RAD9A
SOCS2	IKBKG	NSFL1C
VPS11	MCC	SPEF2
ZNF862	SMAD6	NEIL1
EIF2D	CCR1	SUMF2
BCLAF3	TNC	ZNF79
FBLIM1	ST6GAL1	SLC35A2
FOS	TLR9	MCM8
PCDHB3	MIR379	ADCK1
DEK	FGF7	RUSC1
PRPF40B	LOXL2	LYG1
DUOX2	MAT2A	WASF2
GATD1	TXNIP	ZMAT2
IKBIP	NLK	SIRT6
IST1	SLCO1B3	C4orf46
COMMD5	MIR519D	MAEA
TRAM1	TP53TG1	STIM1
UFSP1	SFRP5	MPPE1
MRAS	MIR363	STX1A
GLIS2	DCK	GRPEL2
SYTL1	MDC1-AS1	MPV17L2
HRAS	PRSS1	RCCD1
FKBP1C	MYO1B	PYCR3
ZNF829	URGCP	COA6
ANGPT1	SPINT2	ZNF354B
LRRC14	MIR92B	FAM234A
TRMU	C12orf43	WSB2
ZNF555	GSN	SPIRE2
ZFAT	TRIP12	ZNF740
PRX	MIR218-1	MTIF3
SEC61A1	THBS4	DCTN2
STOX2	RLIM	LSM11
FAM228B	ATF6	UBAP2L
DYNC2I1	CLDN10	DNAH1
SLC44A5	TOE1	GOLGA3
TMEM141	HNRNPA2B1	C1orf159
ZNF517	MIR218-2	ZBTB42
UBQLN4	SULT2A1	FRK
MT1G	MIR299	DUSP3
MFSD11	PDGFB	MSH2
TULP4	DNAH8	MIIP
MAP3K8	CUL2	YARS2
TLE1	PRDX5	NDUFAF3
KCNJ5	AKAP9	SLC29A3
ANKEF1	TFR2	ZSWIM3
PTP4A1	CXCL1	NMB
TMC7	S100A9	KLHDC8B
CBFA2T3	MYBL2	UBIAD1
MGAT3	ZKSCAN1	ZNF195
AQP5	ZNF667-AS1	RNF227
AZIN1	MIR505	ZNF219
ADNP2	TRAF3	ILF3
NIPA2	TRIM37	SCAMP4
TOB2	ACE	TCFL5
KIRREL2	HMBS	ZZEF1
TUBB4A	YTHDC2	DXO
ZNF207	FAT1	AURKA
EFNB2	TPO	SDHAF1
FAM20B	HLA-C	B4GALT4
SLC35E1	ACTN4	ZFP69
WARS1	KCNH1	LAMB2
PRPF4B	PTPRJ	CNOT10
LY6G5C	YTHDF2	SYF2
PHF1	MIR33B	TMEM11
KCNE5	BRD7	TUBGCP6
GBP2	PTGER4	MYCBP
TSLP	PTPA	ARHGAP39
JRKL	HP	UPF3B
SHANK3	MIR493	ATP6V0A1
DGKA	SIAH1	DCST2
RECQL	TNFRSF9	NCSTN
CGAS	MMP15	PRPF39
GPSM2	HNRNPH1	PHKG2
CC2D1A	ACSL4	PHF5A
HRH1	S100A7	DNHD1
CCNB2	SHBG	MIEF2
MYMX	MIR625	ZNF232
BCAS4	ELOC	ZNF224
TAC3	CD9	PCYT1A
MMS19	ASPH	CCDC14
ZNF696	PTMA	PI4K2A
UTP20	IQANK1	NLE1
CS	CD63	CENPF
PRRC2C	LINC00336	MED22
MOGAT3	EDNRB	PRUNE1
RNPEPL1	AIFM1	UBFD1
CKS1B	CX3CR1	CENPO
CYP1A2	SLC16A1-AS1	TRIM52
ZSCAN25	USP28	WDR90
TRIM31	GATA4	PTDSS2
ZDHHC12	TJP1	HSF1
CXCL14	KHSRP	CASC3
TUBA4A	GLS2	TRIM66
IRF5	FOLR1	PSMB7
HYLS1	SLC40A1	RABGGTA
MKKS	CCDC26	USP22
F9	SF3B3	GNPTG
PLAU	MIR382	NDUFS8
PBLD	EIF2S1	UFC1
ADORA2A	TRAF5	ABCF2
CPEB3	LGALS9	MAPKAPK2
ZNF251	NUMB	B3GALT6
TMEM74B	DDX3X	CPQ
UBR5	DCUN1D1	IFT172
NRG2	VWF	RBM39
CCNA2	CDC20	CORO1B
CYP2C9	IRF3	ZNF202
WDR5	DES	POLR2K
ZGRF1	CYP3A5	STN1
C18orf54	BLZF1	LSM7
LRP10	HCG11	OLA1
TUBB	MIR654	PPP1R3E
TDO2	PGF	GGA1
DHRS7	MIR449A	CIC
TIA1	USP53	SMIM29
ACTL6A	FGF4	IQCE
SPC24	ASL	TMBIM1
NR4A1	TUBB3	CENATAC
UTP23	PRMT5	PPP1CA
AFAP1L1	RASSF1-AS1	CDK7
POLE2	TNFSF11	TEF
HAX1	MIR885	POMGNT1
DRG2	CHP2	ACYP1
LRRC42	CYP2C19	SRRT
DMPK	MDC1	ZNF512
PTPN14	UROD	HGH1
ZNF362	GNE	BCL7C
TXNDC9	ST13	ZNF746
KCNK9	SPINT1	TAF1D
CCT2	RBBP4	NUDT17
CDH16	E2F2	TWF2
VAC14	PHF20	CDC7
SSR2	DVL3	FNBP4
MAP1A	LOC107303338	FAM3A
PLXND1	CD163	BICRA
MAGEA8	DMD	AKAP8L
NOX1	EPHA5	CIZ1
PARP15	APOA1	SEC13
CCNJ	LIPC	DLGAP5
HAUS4	NOX4	RAD54L
ALDH18A1	DROSHA	KLHL36
MMP14	SIRPA	POLR3E
GHR	F2RL1	ARL16
RHOC	SOAT1	TMEM39B
RFWD3	CYP7A1	SMG9
BSG	DSP	SYMPK
RAMAC	PPARGC1A	RNPEP
MYSM1	RAD54B	TIPIN
HMGXB4	SLCO1B1	LONP1
SNRPA1	PRDX1	C22orf39
TSC22D4	SCARNA5	RBM19
PCBP1	IGFBP6	UNC50
ZNF37A	BRINP1	ORMDL2
NCBP2	DGUOK	PCID2
TMEM161A	ABCC5	NPRL2
BRD3OS	PYCARD	ZNF524
DESI2	IFNL3	UCK2
NUP43	ITGA3	SAAL1
RBM4	MIR510	ADAMTS10
GGNBP2	GALNT12	SMURF1
SLC1A3	KRT13	ZSWIM1
KRTAP5-1	TERLR1	PACSIN2
RAB23	TH2LCRR	CIAPIN1
SGSM1	ADH1C	EXOSC5
CIRBP	PHKB	SNAPC4
NHSL2	PPP2R5C	ZNF587
DGKZ	ZC4H2	MKRN2
HK1	SCARB1	KCTD21
H4C5	GRWD1	MARK2
GAS2L1	DVL1	FAM229A
PIEZO2	UBE3A	TRIP13
ADIPOR1	RIPK1	WDR91
DDX54	ACOX1	TLX1
MMS22L	TIGIT	NENF
EBNA1BP2	SRSF1	PAAF1
DDAH2	PDE11A	TCERG1
HCST	CCL4	SAMD1
N6AMT1	PSAP	GPS1
GNL2	LGALS3BP	MAN2A2
DPH2	ROCK2	FBXO4
ZNF414	HJV	ZNF689
NELFE	EFNB2	QTRT1
MYO18B	HDAC6	CCDC34
MYO5A	SLC10A2	CCDC22
CLEC2D	RICTOR	GGA3
MYRF	NES	ZNF212
CATSPER3	MIR876	ALS2CL
C7	IFNAR1	SNCAIP
PRR36	SNHG14	ADAT2
ATG16L2	RPLP0	TBL1X
PRIM2	EPHX2	HIF1AN
DAXX	TTR	PRPF19
HEG1	RRP1B	SNRNP35
CCDC174	GEN1	RHEBL1
CTSV	LYST	RPLP1
MT1X	COPS6	EXOC3
NDUFB3	MIR873	DUS1L
PPT2	CSNK2A2	SUV39H1
ANKRD10	NEU1	HMGN2
MFAP3L	HK1	TMEM183A
BMP4	INHBA	C19orf47
S100A13	E2F4	RBX1
MRTFA	ROR2	HTRA2
CIART	PIK3C3	PSMC5
ULK1	SSTR5	SUB1
EXOC3L1	OTC	STMN1
MAGOH	MIR1207	CYC1
TNFAIP6	TM6SF2	RBMX2
USP31	DDX5	TIMM21
ABI1	AKR1D1	MKNK1
GTSF1	CRIPTO	CDK10
CFAP298	IL32	PARN
BTBD2	ID2	HPX
C2CD5	MOK	HGS
TARBP1	SNHG17	IMMP2L
COMMD3	WSPAR	ZRANB2
SH3BGRL3	PLCG1	ZNF3
TRNT1	MIR1307	DTNA
C19orf25	MIR411	WDR76
NDUFA11	MIR671	GNPAT
A4GALT	MAGED2	DPY30
BCAP31	CTSL	DIS3L2
LHFPL6	MCM7	XYLT2
RBM3	GRN	FNTB
MIS18A	MIR526B	FBXO10
RPL35	S100A2	TAF1C
WNT5A	PHF2	MRPS12
L3HYPDH	SLC16A1	TRIM59
ILKAP	CTBP1	KATNB1
PRR12	HNRNPK	NSMF
MID2	FOLH1	TBC1D25
PGM2L1	ADRM1	ZFPL1
TXN	DLGAP5	B4GALT2
CERS5	POLR2E	HSF4
TET3	SEMA3B	HSDL1
RPS6KL1	SPAAR	EML3
SF3B2	LRP6	FKBP3
PSMD13	SRF	NFRKB
ARSI	LINC00882	PITPNM1
PIAS4	SEMA4A	ZPR1
ZNF169	MIR660	TOMM40L
PRICKLE3	TGM2	POLR1D
PACS2	RREB1	WDSUB1
C1orf43	CBL	ESRRA
MYO9B	HIF1A-AS1	CENPW
HSPBAP1	LINC00313	OTUD5
SPON2	WNT5B	NDUFA8
MED10	PTPN6	YJEFN3
PALD1	IVL	RBM33
WDR77	GADD45A	KAT2A
HSD11B2	GAB1	EME2
SPTSSA	TALDO1	MYBBP1A
AIMP1	HSD17B13	RRP36
CCL15	CTSE	MTA1
CD4	AKR1C3	CNIH4
TM9SF1	VTCN1	TRADD
C2orf76	TGFB3	PRPF6
MUS81	NR5A2	PHRF1
PEDS1	ITGA1	NUDCD2
NUDT5	TK1	NEIL3
GPX7	SMG1	GRK6
MED27	TTN-AS1	IRGQ
NPC1	CDR1-AS	EIF4E2
FOXK1	PRDX3	DCAF4
HDGFL3	BCL6	CCDC40
P2RY6	FZD3	SHLD1
KLHL21	ELF3-AS1	REPIN1
ZYX	OPCML	RCC1L
MRPL27	DKK3	GALNT10
ADH1A	MSN	IDUA
LGALS9	CD55	EPS15L1
TSPAN8	MMP16	SRSF2
SEMA3F	LINC01186	RNF44
ACLY	PAX5	GMNN
EGR1	INTS3	DNAJC8
GRAP2	FBXO11	PUF60
TBP	PHKG2	COASY
TESMIN	PSCA	SLC35A4
LYAR	CAND1	RPA1
DLAT	RRM1	SNX17
SLC2A6	LINC02605	SGTA
DAPK3	HSF1	RTF2
STK25	SIRT6	FTSJ1
SUPT5H	SREBF2	MAGOHB
CWF19L1	ADM	ASPSCR1
ITPKA	CD28	IGHMBP2
ZNF668	UIMC1	ADARB1
AP2B1	NAT1	GNB1L
ECEL1	ATF3	STUB1
ZNF383	PRKCE	ARHGEF37
ZNF30	ELOB	H2BC15
MFSD2A	MRPL58	FBXL15
GPATCH4	S100A6	ABHD4
CASK	LATS1	ARL2
FAM53C	THY1	RCBTB1
AGER	HES1	ARMC1
TMEM201	MT1G	WDR53
ZWINT	PROX1	NMT1
MARCHF9	PCGF2	TYMS
FDXACB1	SMARCC2	PIP4P1
SAMM50	MIR1247	WDR37
DYNC1I2	RBX1	PGS1
WIPF2	PHKA2	JMJD4
GLRX2	LINC01089	ERBB3
ZNF671	MAML2	POLG2
CADM4	STAT2	CDC25C
LRRC20	EIF3E	RPTOR
ZNF541	MGAT3	NGDN
DPEP1	UGT1A9	ALKBH4
NOL6	LINC01554	FAIM
RPS10	YWHAZ	RHNO1
CDK1	FST	LIG1
YWHAQ	IL24	NQO1
KHSRP	DLL1	SIN3B
ITGA11	APOD	IFT22
CDC42SE1	KRT16	DEPDC1B
SLC25A33	AKR1C1	CNPPD1
TMOD2	CBFB	NUBP2
KCNJ2	SYK	PIN1
NOL4L	TRIM52-AS1	CDT1
RNF145	MBL2	RCN2
TUBA1C	THBD	AZGP1
SLC7A6OS	ANXA10	CHDH
ERCC8	MAP2K2	ACTR6
NTF3	REST	PPOX
ZNF146	CLDN3	HPS4
SYPL1	APOE	HJURP
CCDC138	EEF1A2	UPF3A
RAD18	MIR326	VPS25
LRRC37A3	NGFR	SMPD4
PACRGL	SOCS2	RRP12
BANF1	FEN1	ARV1
IVNS1ABP	HGFAC	CYREN
E2F2	TCHP	SEPTIN8
GPR161	BCL2L2	AURKB
USP49	SULT1A1	TRAF7
REEP4	PIM2	NOSIP
H2AC6	CABIN1	ZNF599
ZBTB33	SGK1	NOMO1
ANP32E	PDGFA	ATP5PD
TRIM27	ABCE1	SEPHS1
POLQ	ASPRV1	SETD4
DTYMK	HSPA9	C8orf33
MRPL13	LINC-PINT	PLXNA3
ATP2A2	ETV4	CENPU
ORC3	NCOA1	CCDC24
TMEM50A	FURIN	MIEF1
NHP2	MIR454	CEP89
SLX4	LINC00052	PIP4K2C
NDUFA1	SOAT2	SNAPC2
H4C12	ATG5	PPARA
PRKAB1	VIP	REXO4
RPS27	SOX17	ABCF1
TEX29	ARID1B	TSSK6
ILRUN	MACF1	CPLANE2
DLGAP4	VHRT	BOP1
ARHGAP4	PFKFB3	TIMM13
GINS3	MIR509-1	USP21
AGO2	NR4A1	GRWD1
KPNB1	GPSM2	CCT6A
SOCS5	KLF5	RPP38
CLIC5	KREMEN1	NPRL3
LAMTOR2	DAB2	VAMP1
MRTO4	REG1A	SKP1
F2RL3	MUC17	CCT4
SLC9A6	WNT2	SNX3
ZNF772	MYO5B	STK35
PPM1F	NR1I3	POU5F1
TMEM14A	ST8SIA6-AS1	CROCC
TOM1L2	INHA	DRAM2
PPP2R5D	LOC130001603	CHCHD4
GTPBP2	PDLIM5	MITD1
UBXN2B	YTHDF1	GAK
TYK2	LTA	KLHL26
HYAL3	CXCL14	SCNM1
CCDC9B	SMPD1	LCMT1
ITGAM	CHAC1	ZNF775
FPR1	AGL	EXOG
PIGX	PALM2AKAP2	ZNF250
GLMP	GRPR	POLRMT
PWP1	OSM	TRIM28
ZNF525	TRIM28	ENY2
PDE6D	HNRNPA1	DHPS
DALRD3	HDGFL2	DGUOK
ZNF580	TP53BP2	HHAT
RPS4X	FNDC3B	DBNL
IDO1	USP7	ZNF691
WDR12	EFNA3	MRPL44
PRRX1	NT5E	CCNQ
PKNOX1	STX8	INO80C
CCL28	S100B	CLN6
ANKFN1	PPRC1	CCT3
TBL3	CKB	LYPLAL1
ACD	PHGDH	ECT2
YAE1	ARTN	PKMYT1
EXOSC4	IRS2	MRPS14
CSPG4	LATS2	RMI2
PRMT1	TMEM8B	METTL17
SYNGR2	CUL1	C5orf34
DDOST	SLC11A2	MYL12B
METTL1	SPHK1	HTT
ZNF616	RPS27A	TMED4
MSTO1	CUL3	PAK4
FOXD2	IL12A	NECAB3
WDR46	CRABP1	NAA10
SNX16	RUNX1T1	GTF2F2
PDCD2L	MIR433	SRCIN1
ZNF385A	KHDRBS1	GLTP
LUC7L2	CAVIN1	ELK1
SLC35E2B	HBB	TMCO4
SLC4A11	TUBA1B	DNASE1
YEATS2	GGPS1	ZNF792
VMAC	EPRS1	TMEM14B
RNMT	COL1A1	KCTD13
SOSTDC1	PRMT1	STARD3
CSAG1	ACLY	PARP2
PYGO2	ALOX5	SCAF1
SFI1	HPRT1	BRICD5
STOML1	HEPACAM	SREK1
SLC22A1	MYH11	ZNF837
ZNF610	CEACAM7	TTC9C
MROH1	PEX1	NUAK1
AGRN	GPC1	NIPAL2
ANKRD52	CAPN2	MRNIP
TIMM44	ECT2	MRRF
FBRS	MIR942	BIVM
JAG1	HDAC3	ZSCAN9
BUB3	RUVBL2	ARMH3
BABAM1	LINC00858	ANP32A
GNG4	LINC00668	OSGEPL1
EXTL2	SNORD44	CKAP2L
[truncated: 4,481 more rows]

## Sheet: SIV
Table SVI. GO enrichment analysis.
ONTOLOGY	ID	Description	P-value	FDRqvalue	GeneID	Count
BP	GO:0044772	mitotic cell cycle phase transition	5.70781e-09	6.6451e-06	CDK7/CDK5/CCNE1/CDK1/CDC25C/CDC25B/MELK/AURKB/PKMYT1/EZH2/ERCC2	11
BP	GO:0071900	regulation of protein serine/threonine kinase activity	1.29665e-08	7.54789e-06	CDK7/CCNE1/MAP3K11/IRAK1/MAP2K2/CDC25C/PKMYT1/EZH2/ABL1	9
BP	GO:0046777	protein autophosphorylation	3.04977e-07	9.15486e-05	MAP3K11/IRAK1/MAP2K2/MELK/AURKB/MAPK3/ABL1	7
BP	GO:0051347	positive regulation of transferase activity	3.14543e-07	9.15486e-05	MAP3K11/IRAK1/MAP2K2/AURKB/GSK3A/PIN1/MAPK3/EZH2/ABL1	9
BP	GO:0000280	nuclear division	5.34173e-07	0.000124378	CCNE1/CDK1/TOP2A/CDC25C/CDC25B/KIF11/AURKB/PIN1/PKMYT1	9
BP	GO:0000086	G2/M transition of mitotic cell cycle	7.28478e-07	0.00013168	CDK1/CDC25C/CDC25B/MELK/AURKB/PKMYT1	6
BP	GO:0043393	regulation of protein binding	7.91749e-07	0.00013168	FKBP1A/AURKB/HDAC5/HDAC4/PIN1/ABL1	6
BP	GO:0048285	organelle fission	1.23983e-06	0.000153926	CCNE1/CDK1/TOP2A/CDC25C/CDC25B/KIF11/AURKB/PIN1/PKMYT1	9
BP	GO:1901993	regulation of meiotic cell cycle phase transition	1.30797e-06	0.000153926	CDC25C/CDC25B/PKMYT1	3
BP	GO:0044839	cell cycle G2/M phase transition	1.32215e-06	0.000153926	CDK1/CDC25C/CDC25B/MELK/AURKB/PKMYT1	6
BP	GO:0051154	negative regulation of striated muscle cell differentiation	2.22592e-06	0.000235585	GSK3A/HDAC5/HDAC4/EZH2	4
BP	GO:0006979	response to oxidative stress	2.87924e-06	0.000255543	CDK1/NQO1/MAPK3/EZH2/PSMB5/ABL1/XRCC1/ERCC2	8
BP	GO:0018107	peptidyl-threonine phosphorylation	3.1004e-06	0.000255543	CDK5/CDK1/GSK3A/PRKCA/CSNK2A1	5
BP	GO:0044771	meiotic cell cycle phase transition	3.1025e-06	0.000255543	CDC25C/CDC25B/PKMYT1	3
BP	GO:1901873	regulation of post-translational protein modification	3.29248e-06	0.000255543	SAE1/CDK5/WDR5/GSK3A/HDAC4/PIN1/ABL1	7
BP	GO:0032200	telomere organization	3.92887e-06	0.000262277	APEX1/CCNE1/AURKB/MAPK3/EZH2/XRCC1	6
BP	GO:0018105	peptidyl-serine phosphorylation	4.229e-06	0.000262277	CDK5/CDK1/MAP2K2/CSNK1D/GSK3A/PRKCA/CSNK2A1	7
BP	GO:0048511	rhythmic process	4.32415e-06	0.000262277	CDK5/CDK1/TOP2A/CSNK1D/TYMS/CSNK2A1/EZH2	7
BP	GO:0007059	chromosome segregation	4.42672e-06	0.000262277	CCNE1/CDK1/TOP2A/CSNK1D/KIF11/AURKB/CSNK2A1/ERCC2	8
BP	GO:0048308	organelle inheritance	4.92012e-06	0.000262277	CDK1/MAP2K2/MAPK3	3
BP	GO:0048313	Golgi inheritance	4.92012e-06	0.000262277	CDK1/MAP2K2/MAPK3	3
BP	GO:0018210	peptidyl-threonine modification	4.95624e-06	0.000262277	CDK5/CDK1/GSK3A/PRKCA/CSNK2A1	5
BP	GO:0018209	peptidyl-serine modification	5.61272e-06	0.000283451	CDK5/CDK1/MAP2K2/CSNK1D/GSK3A/PRKCA/CSNK2A1	7
BP	GO:0048009	insulin-like growth factor receptor signaling pathway	5.8433e-06	0.000283451	MAP2K2/GRB2/MAPK3/ERCC2	4
BP	GO:1902749	regulation of cell cycle G2/M phase transition	6.42985e-06	0.000299428	CDK1/CDC25C/CDC25B/AURKB/PKMYT1	5
BP	GO:1901987	regulation of cell cycle phase transition	7.54598e-06	0.000337889	CDK7/CDK1/CDC25C/CDC25B/AURKB/PKMYT1/EZH2/ERCC2	8
BP	GO:0043525	positive regulation of neuron apoptotic process	7.8753e-06	0.000339574	CDK5/MAP3K11/NQO1/ABL1	4
BP	GO:0045787	positive regulation of cell cycle	9.52568e-06	0.000396068	CDK1/CDC25C/CDC25B/AURKB/PRKCA/EZH2/ABL1	7
BP	GO:0043410	positive regulation of MAPK cascade	1.00044e-05	0.00040163	MAP3K11/IRAK1/MAP2K2/PRKCA/MAPK3/EZH2/PRMT1/ABL1	8
BP	GO:0045931	positive regulation of mitotic cell cycle	1.03946e-05	0.000403384	CDK1/CDC25C/CDC25B/PRKCA/ABL1	5
BP	GO:0071222	cellular response to lipopolysaccharide	1.16261e-05	0.000436622	IRAK1/BCR/HDAC5/PRKCA/MAPK3/ABL1	6
BP	GO:0032496	response to lipopolysaccharide	1.24341e-05	0.00045237	IRAK1/BCR/NQO1/HDAC5/PRKCA/MAPK3/ABL1	7
BP	GO:0051403	stress-activated MAPK cascade	1.2845e-05	0.000453158	MAP3K11/IRAK1/MAP2K2/MAPK11/MAPK3/PRMT1	6
BP	GO:0061982	meiosis I cell cycle process	1.39528e-05	0.000470467	CCNE1/TOP2A/CDC25C/CDC25B/PKMYT1	5
BP	GO:1901990	regulation of mitotic cell cycle phase transition	1.41438e-05	0.000470467	CDK7/CDK1/CDC25C/CDC25B/AURKB/EZH2/ERCC2	7
BP	GO:0031098	stress-activated protein kinase signaling cascade	1.55932e-05	0.00048176	MAP3K11/IRAK1/MAP2K2/MAPK11/MAPK3/PRMT1	6
BP	GO:0071219	cellular response to molecule of bacterial origin	1.59678e-05	0.00048176	IRAK1/BCR/HDAC5/PRKCA/MAPK3/ABL1	6
BP	GO:0070555	response to interleukin-1	1.60555e-05	0.00048176	IRAK1/MAPK11/HDAC4/PRKCA/MAPK3	5
BP	GO:0070301	cellular response to hydrogen peroxide	1.61385e-05	0.00048176	CDK1/NQO1/EZH2/ABL1	4
BP	GO:1903320	regulation of protein modification by small protein conjugation or removal	1.75397e-05	0.000510497	SAE1/CDK5/GSK3A/HDAC4/PIN1/ABL1	6
BP	GO:0002237	response to molecule of bacterial origin	1.81514e-05	0.000515415	IRAK1/BCR/NQO1/HDAC5/PRKCA/MAPK3/ABL1	7
BP	GO:0051148	negative regulation of muscle cell differentiation	1.92101e-05	0.000520763	GSK3A/HDAC5/HDAC4/EZH2	4
BP	GO:0048738	cardiac muscle tissue development	1.92343e-05	0.000520763	FKBP1A/CDK1/GSK3A/MAPK11/PRMT1/ABL1	6
BP	GO:0034614	cellular response to reactive oxygen species	2.54248e-05	0.000672723	CDK1/NQO1/MAPK3/EZH2/ABL1	5
BP	GO:0051098	regulation of binding	2.6807e-05	0.000678548	FKBP1A/AURKB/HDAC5/HDAC4/PIN1/ABL1	6
BP	GO:0000723	telomere maintenance	2.70512e-05	0.000678548	APEX1/CCNE1/AURKB/MAPK3/XRCC1	5
BP	GO:1904353	regulation of telomere capping	2.76277e-05	0.000678548	AURKB/MAPK3/XRCC1	3
BP	GO:0014706	striated muscle tissue development	2.79763e-05	0.000678548	FKBP1A/CDK1/GSK3A/MAPK11/PRMT1/ABL1	6
BP	GO:0071216	cellular response to biotic stimulus	2.85762e-05	0.000678953	IRAK1/BCR/HDAC5/PRKCA/MAPK3/ABL1	6
BP	GO:1901875	positive regulation of post-translational protein modification	2.96413e-05	0.000690175	SAE1/WDR5/GSK3A/HDAC4/PIN1	5
BP	GO:0051147	regulation of muscle cell differentiation	3.24202e-05	0.000740077	GSK3A/HDAC5/MAPK11/HDAC4/EZH2	5
BP	GO:0140014	mitotic nuclear division	3.44555e-05	0.000771412	CDK1/CDC25C/KIF11/AURKB/PIN1/PKMYT1	6
BP	GO:0000079	regulation of cyclin-dependent protein serine/threonine kinase activity	3.59257e-05	0.000789152	CDK7/CCNE1/CDC25C/PKMYT1	4
BP	GO:0044843	cell cycle G1/S phase transition	3.81197e-05	0.000817971	CDK7/CDK5/CCNE1/CDK1/MAP3K11/EZH2	6
BP	GO:0010971	positive regulation of G2/M transition of mitotic cell cycle	3.86428e-05	0.000817971	CDK1/CDC25C/CDC25B	3
BP	GO:1904029	regulation of cyclin-dependent protein kinase activity	4.13835e-05	0.000860341	CDK7/CCNE1/CDC25C/PKMYT1	4
BP	GO:0030878	thyroid gland development	4.7386e-05	0.000967848	MAP2K2/THRA/MAPK3	3
BP	GO:0055017	cardiac muscle tissue growth	4.95745e-05	0.000993622	CDK1/GSK3A/MAPK11/ABL1	4
BP	GO:0060537	muscle tissue development	5.03549e-05	0.000993622	CDK5/FKBP1A/CDK1/GSK3A/MAPK11/PRMT1/ABL1	7
BP	GO:0048384	retinoic acid receptor signaling pathway	5.2205e-05	0.000996355	RXRB/THRA/EZH2	3
BP	GO:1902751	positive regulation of cell cycle G2/M phase transition	5.2205e-05	0.000996355	CDK1/CDC25C/CDC25B	3
BP	GO:0042770	signal transduction in response to DNA damage	6.75713e-05	0.00126292	CDK1/MDM4/GRB2/MAPK3/ABL1	5
BP	GO:0051153	regulation of striated muscle cell differentiation	6.94265e-05	0.00126292	GSK3A/HDAC5/HDAC4/EZH2	4
BP	GO:0060419	heart growth	6.94265e-05	0.00126292	CDK1/GSK3A/MAPK11/ABL1	4
BP	GO:0003300	cardiac muscle hypertrophy	7.51798e-05	0.00134213	GSK3A/HDAC4/PRKCA/EZH2	4
BP	GO:0048872	homeostasis of number of cells	7.60863e-05	0.00134213	BCR/THRA/EZH2/PRMT1/ABL1/ERCC2	6
BP	GO:0042542	response to hydrogen peroxide	8.12728e-05	0.00141222	CDK1/NQO1/EZH2/ABL1	4
BP	GO:0014897	striated muscle hypertrophy	8.44506e-05	0.00144586	GSK3A/HDAC4/PRKCA/EZH2	4
BP	GO:0010389	regulation of G2/M transition of mitotic cell cycle	9.1076e-05	0.0014934	CDK1/CDC25C/CDC25B/AURKB	4
BP	GO:0014896	muscle hypertrophy	9.1076e-05	0.0014934	GSK3A/HDAC4/PRKCA/EZH2	4
BP	GO:0021549	cerebellum development	9.1076e-05	0.0014934	CDK5/EZH2/ABL1/XRCC1	4
BP	GO:0016233	telomere capping	9.51265e-05	0.00153816	AURKB/MAPK3/XRCC1	3
BP	GO:0007623	circadian rhythm	9.69139e-05	0.00154559	CDK1/TOP2A/CSNK1D/TYMS/EZH2	5
BP	GO:0000302	response to reactive oxygen species	9.91701e-05	0.0015602	CDK1/NQO1/MAPK3/EZH2/ABL1	5
BP	GO:0032386	regulation of intracellular transport	0.000106612	0.00163314	SAE1/CDK5/CDK1/MAP2K2/GSK3A/MAPK3	6
BP	GO:0070371	ERK1 and ERK2 cascade	0.000106612	0.00163314	CDK1/MAP2K2/PIN1/PRKCA/MAPK3/ABL1	6
BP	GO:0042063	gliogenesis	0.000110134	0.00166518	CDK5/CDK1/MAPK3/EZH2/ABL1/ERCC2	6
BP	GO:1903046	meiotic cell cycle process	0.000121346	0.00181118	CCNE1/TOP2A/CDC25C/CDC25B/PKMYT1	5
BP	GO:0022037	metencephalon development	0.000130007	0.00188569	CDK5/EZH2/ABL1/XRCC1	4
BP	GO:0042752	regulation of circadian rhythm	0.000130007	0.00188569	CDK1/TOP2A/CSNK1D/EZH2	4
BP	GO:0009895	negative regulation of catabolic process	0.000131197	0.00188569	MDM4/NQO1/GSK3A/HDAC4/PIN1/CSNK2A1	6
BP	GO:0021587	cerebellum morphogenesis	0.000136765	0.00194175	CDK5/ABL1/XRCC1	3
BP	GO:0007088	regulation of mitotic nuclear division	0.000148525	0.00205851	CDC25C/AURKB/PIN1/PKMYT1	4
BP	GO:0043500	muscle adaptation	0.000148525	0.00205851	GSK3A/HDAC4/PRKCA/EZH2	4
BP	GO:1901989	positive regulation of cell cycle phase transition	0.000153438	0.00210158	CDK1/CDC25C/CDC25B/EZH2	4
BP	GO:0045814	negative regulation of gene expression, epigenetic	0.000158467	0.00214523	GSK3A/HDAC5/HDAC4/EZH2	4
BP	GO:0042176	regulation of protein catabolic process	0.000164954	0.00217995	MDM4/NQO1/CSNK1D/GSK3A/PIN1/CSNK2A1	6
BP	GO:0040029	epigenetic regulation of gene expression	0.000166552	0.00217995	WDR5/GSK3A/HDAC5/HDAC4/EZH2	5
BP	GO:0021575	hindbrain morphogenesis	0.00016665	0.00217995	CDK5/ABL1/XRCC1	3
BP	GO:0048538	thymus development	0.000188753	0.00244165	MAP2K2/MAPK3/ABL1	3
BP	GO:1901653	cellular response to peptide	0.000191047	0.00244416	CDK5/GSK3A/HDAC5/GRB2/PRKCA/MAPK3	6
BP	GO:1903322	positive regulation of protein modification by small protein conjugation or removal	0.00022852	0.0028918	SAE1/GSK3A/HDAC4/PIN1	4
BP	GO:0033044	regulation of chromosome organization	0.000236668	0.0029627	CDK1/TOP2A/AURKB/MAPK3/XRCC1	5
BP	GO:0000082	G1/S transition of mitotic cell cycle	0.000259638	0.00318182	CDK7/CDK5/CCNE1/CDK1/EZH2	5
BP	GO:0010001	glial cell differentiation	0.000259638	0.00318182	CDK5/CDK1/MAPK3/ABL1/ERCC2	5
BP	GO:1902991	regulation of amyloid precursor protein catabolic process	0.00026623	0.00322863	FKBP1A/GSK3A/PIN1	3
BP	GO:0034599	cellular response to oxidative stress	0.000274211	0.00323812	CDK1/NQO1/MAPK3/EZH2/ABL1	5
BP	GO:0060020	Bergmann glial cell differentiation	0.000275357	0.00323812	MAPK3/ABL1	2
BP	GO:0060439	trachea morphogenesis	0.000275357	0.00323812	MAP2K2/MAPK3	2
BP	GO:0035270	endocrine system development	0.000278411	0.00324129	MAP2K2/THRA/GSK3A/MAPK3	4
BP	GO:0071902	positive regulation of protein serine/threonine kinase activity	0.000286127	0.00329814	MAP3K11/IRAK1/MAP2K2/EZH2	4
BP	GO:0045786	negative regulation of cell cycle	0.000301101	0.00343671	CDK5/CDK1/AURKB/PKMYT1/EZH2/ABL1	6
BP	GO:0090068	positive regulation of cell cycle process	0.000310636	0.00348858	CDK1/CDC25C/CDC25B/AURKB/EZH2	5
BP	GO:0031663	lipopolysaccharide-mediated signaling pathway	0.000311638	0.00348858	IRAK1/PRKCA/MAPK3	3
BP	GO:0060038	cardiac muscle cell proliferation	0.000327812	0.00358546	CDK1/MAPK11/ABL1	3
BP	GO:0000012	single strand break repair	0.000329951	0.00358546	TDP1/XRCC1	2
BP	GO:0033235	positive regulation of protein sumoylation	0.000329951	0.00358546	SAE1/HDAC4	2
BP	GO:0030177	positive regulation of Wnt signaling pathway	0.000335691	0.00358546	CSNK1D/PIN1/CSNK2A1/ABL1	4
BP	GO:0051783	regulation of nuclear division	0.000335691	0.00358546	CDC25C/AURKB/PIN1/PKMYT1	4
BP	GO:0042692	muscle cell differentiation	0.000351637	0.00372163	CDK1/GSK3A/HDAC5/MAPK11/HDAC4/EZH2	6
BP	GO:0032092	positive regulation of protein binding	0.000361765	0.00379433	FKBP1A/PIN1/ABL1	3
BP	GO:0030183	B cell differentiation	0.00040097	0.00416798	HDAC5/HDAC4/EZH2/ABL1	4
BP	GO:0031100	animal organ regeneration	0.000416812	0.00429431	CDK1/TYMS/EZH2	3
BP	GO:0009410	response to xenobiotic stimulus	0.000423929	0.00432933	CDK1/NQO1/HDAC5/TYMS/ABL1/XRCC1	6
BP	GO:0045860	positive regulation of protein kinase activity	0.000435121	0.00435472	MAP3K11/IRAK1/MAP2K2/EZH2/ABL1	5
BP	GO:0055021	regulation of cardiac muscle tissue growth	0.000436288	0.00435472	CDK1/GSK3A/MAPK11	3
BP	GO:0007030	Golgi organization	0.000442102	0.00435472	CDK1/MAP2K2/CSNK1D/MAPK3	4
BP	GO:0030902	hindbrain development	0.000442102	0.00435472	CDK5/EZH2/ABL1/XRCC1	4
BP	GO:0090316	positive regulation of intracellular protein transport	0.000452838	0.00435472	SAE1/CDK5/CDK1/GSK3A	4
BP	GO:0051231	spindle elongation	0.000453617	0.00435472	KIF11/AURKB	2
BP	GO:0106070	regulation of adenylate cyclase-activating G protein-coupled receptor signaling pathway	0.000453617	0.00435472	GSK3A/PRKCA	2
BP	GO:0051445	regulation of meiotic cell cycle	0.00045634	0.00435472	CDC25C/CDC25B/PKMYT1	3
BP	GO:0051321	meiotic cell cycle	0.000471414	0.00443707	CCNE1/TOP2A/CDC25C/CDC25B/PKMYT1	5
BP	GO:0048732	gland development	0.000472592	0.00443707	MAP2K2/THRA/TYMS/MAPK3/EZH2/ABL1	6
BP	GO:0042987	amyloid precursor protein catabolic process	0.000498199	0.00464007	FKBP1A/GSK3A/PIN1	3
BP	GO:0034501	protein localization to kinetochore	0.000522647	0.00475368	CDK1/AURKB	2
BP	GO:1903083	protein localization to condensed chromosome	0.000522647	0.00475368	CDK1/AURKB	2
BP	GO:2000052	positive regulation of non-canonical Wnt signaling pathway	0.000522647	0.00475368	CSNK1D/ABL1	2
BP	GO:1902750	negative regulation of cell cycle G2/M phase transition	0.000542444	0.00489549	CDK1/AURKB/PKMYT1	3
BP	GO:0001666	response to hypoxia	0.000559278	0.00497036	IRAK1/MDM4/PIN1/XRCC1/ERCC2	5
BP	GO:0051054	positive regulation of DNA metabolic process	0.000559278	0.00497036	CDK1/AURKB/MAPK3/XRCC1/ERCC2	5
BP	GO:0060420	regulation of heart growth	0.000565478	0.00498739	CDK1/GSK3A/MAPK11	3
BP	GO:0016055	Wnt signaling pathway	0.000569804	0.00498776	CCNE1/CSNK1D/GSK3A/PIN1/CSNK2A1/ABL1	6
BP	GO:0198738	cell-cell signaling by wnt	0.000582976	0.00503181	CCNE1/CSNK1D/GSK3A/PIN1/CSNK2A1/ABL1	6
BP	GO:0006266	DNA ligation	0.000596447	0.00503181	TOP2A/XRCC1	2
BP	GO:0010832	negative regulation of myotube differentiation	0.000596447	0.00503181	HDAC5/HDAC4	2
BP	GO:1900006	positive regulation of dendrite development	0.000596447	0.00503181	EZH2/ABL1	2
BP	GO:1903358	regulation of Golgi organization	0.000596447	0.00503181	MAP2K2/MAPK3	2
BP	GO:0051146	striated muscle cell differentiation	0.000621277	0.00520358	CDK1/GSK3A/HDAC5/HDAC4/EZH2	5
BP	GO:0071375	cellular response to peptide hormone stimulus	0.000668629	0.00556018	GSK3A/HDAC5/GRB2/PRKCA/MAPK3	5
BP	GO:1904355	positive regulation of telomere capping	0.000674996	0.00557332	AURKB/MAPK3	2
BP	GO:0098813	nuclear chromosome segregation	0.00068831	0.00564323	CCNE1/CDK1/TOP2A/KIF11/AURKB	5
BP	GO:0035265	organ growth	0.000694077	0.00565071	CDK1/GSK3A/MAPK11/ABL1	4
BP	GO:0036293	response to decreased oxygen levels	0.000718643	0.00581008	IRAK1/MDM4/PIN1/XRCC1/ERCC2	5
BP	GO:0062197	cellular response to chemical stress	0.000739415	0.00593679	CDK1/NQO1/MAPK3/EZH2/ABL1	5
BP	GO:0038083	peptidyl-tyrosine autophosphorylation	0.000758273	0.0060465	MAPK3/ABL1	2
BP	GO:1903533	regulation of protein targeting	0.000772539	0.00611835	SAE1/CDK5/GSK3A	3
BP	GO:0032872	regulation of stress-activated MAPK cascade	0.000835316	0.00652464	MAP3K11/MAP2K2/MAPK3/PRMT1	4
BP	GO:0051302	regulation of cell division	0.000835316	0.00652464	CDC25B/WDR5/AURKB/PIN1	4
BP	GO:0060438	trachea development	0.000846256	0.00652464	MAP2K2/MAPK3	2
BP	GO:2000641	regulation of early endosome to late endosome transport	0.000846256	0.00652464	MAP2K2/MAPK3	2
BP	GO:0048638	regulation of developmental growth	0.000861819	0.00660091	CDK5/CDK1/GSK3A/MAPK11/ABL1	5
BP	GO:0070302	regulation of stress-activated protein kinase signaling cascade	0.000886596	0.00674288	MAP3K11/MAP2K2/MAPK3/PRMT1	4
BP	GO:0014855	striated muscle cell proliferation	0.000891937	0.00674288	CDK1/MAPK11/ABL1	3
BP	GO:0031099	regeneration	0.000921994	0.00692513	CDK1/MAP2K2/TYMS/EZH2	4
BP	GO:0033674	positive regulation of kinase activity	0.000972749	0.00725952	MAP3K11/IRAK1/MAP2K2/EZH2/ABL1	5
BP	GO:0030111	regulation of Wnt signaling pathway	0.000985702	0.00730933	CSNK1D/GSK3A/PIN1/CSNK2A1/ABL1	5
BP	GO:0006310	DNA recombination	0.00101199	0.00745678	APEX1/TOP2A/ABL1/XRCC1/ERCC2	5
BP	GO:0070482	response to oxygen levels	0.0010524	0.00769011	IRAK1/MDM4/PIN1/XRCC1/ERCC2	5
BP	GO:0043406	positive regulation of MAP kinase activity	0.00105687	0.00769011	MAP3K11/IRAK1/EZH2	3
BP	GO:0031396	regulation of protein ubiquitination	0.00109371	0.00790875	CDK5/GSK3A/PIN1/ABL1	4
BP	GO:0032388	positive regulation of intracellular transport	0.00111408	0.00800633	SAE1/CDK5/CDK1/GSK3A	4
BP	GO:0071103	DNA conformation change	0.00120183	0.00858396	TOP2A/ABL1/ERCC2	3
BP	GO:0032869	cellular response to insulin stimulus	0.00121996	0.00864395	GSK3A/HDAC5/GRB2/MAPK3	4
BP	GO:0032465	regulation of cytokinesis	0.00123993	0.00864395	CDC25B/AURKB/PIN1	3
BP	GO:0043279	response to alkaloid	0.00123993	0.00864395	CDK5/NQO1/HDAC5	3
BP	GO:0043502	regulation of muscle adaptation	0.00123993	0.00864395	GSK3A/HDAC4/PRKCA	3
BP	GO:0021766	hippocampus development	0.00127878	0.0088093	CDK5/EZH2/XRCC1	3
BP	GO:2001251	negative regulation of chromosome organization	0.00127878	0.0088093	TOP2A/AURKB/XRCC1	3
BP	GO:0033233	regulation of protein sumoylation	0.00135605	0.00925086	SAE1/HDAC4	2
BP	GO:0042982	amyloid precursor protein metabolic process	0.00135877	0.00925086	FKBP1A/GSK3A/PIN1	3
BP	GO:0048534	hematopoietic or lymphoid organ development	0.00144185	0.00970298	MAP2K2/MAPK3/ABL1	3
BP	GO:1901992	positive regulation of mitotic cell cycle phase transition	0.00144185	0.00970298	CDK1/CDC25C/CDC25B	3
BP	GO:0006312	mitotic recombination	0.00147184	0.00982009	XRCC1/ERCC2	2
BP	GO:0050821	protein stabilization	0.00147742	0.00982009	CDK7/MDM4/PIN1/CSNK2A1	4
BP	GO:0046620	regulation of organ growth	0.00148456	0.00982009	CDK1/GSK3A/MAPK11	3
BP	GO:0000413	protein peptidyl-prolyl isomerization	0.00159219	0.0104137	FKBP1A/PIN1	2
BP	GO:2000050	regulation of non-canonical Wnt signaling pathway	0.00159219	0.0104137	CSNK1D/ABL1	2
BP	GO:0000819	sister chromatid segregation	0.00168699	0.0108644	CDK1/TOP2A/KIF11/AURKB	4
BP	GO:0032204	regulation of telomere maintenance	0.00171002	0.0108644	AURKB/MAPK3/XRCC1	3
BP	GO:0033157	regulation of intracellular protein transport	0.00171457	0.0108644	SAE1/CDK5/CDK1/GSK3A	4
BP	GO:0045745	positive regulation of G protein-coupled receptor signaling pathway	0.00171708	0.0108644	GSK3A/PRKCA	2
BP	GO:0051446	positive regulation of meiotic cell cycle	0.00171708	0.0108644	CDC25C/CDC25B	2
BP	GO:0051984	positive regulation of chromosome segregation	0.00171708	0.0108644	CDK1/AURKB	2
BP	GO:0055022	negative regulation of cardiac muscle tissue growth	0.0018465	0.0115576	GSK3A/MAPK11	2
BP	GO:0061117	negative regulation of heart growth	0.0018465	0.0115576	GSK3A/MAPK11	2
BP	GO:0043523	regulation of neuron apoptotic process	0.00188664	0.0117457	CDK5/MAP3K11/NQO1/ABL1	4
BP	GO:2001252	positive regulation of chromosome organization	0.00195584	0.0121117	CDK1/AURKB/MAPK3	3
BP	GO:0097421	liver regeneration	0.00198041	0.012199	TYMS/EZH2	2
BP	GO:0071347	cellular response to interleukin-1	0.00206001	0.0126225	IRAK1/MAPK11/MAPK3	3
BP	GO:0043247	telomere maintenance in response to DNA damage	0.00211881	0.0129149	APEX1/XRCC1	2
BP	GO:0042177	negative regulation of protein catabolic process	0.00216757	0.0131433	MDM4/NQO1/PIN1	3
BP	GO:0003299	muscle hypertrophy in response to stress	0.00226166	0.0135028	HDAC4/EZH2	2
BP	GO:0014887	cardiac muscle adaptation	0.00226166	0.0135028	HDAC4/EZH2	2
BP	GO:0014898	cardiac muscle hypertrophy in response to stress	0.00226166	0.0135028	HDAC4/EZH2	2
BP	GO:0048640	negative regulation of developmental growth	0.00227858	0.0135344	CDK5/GSK3A/MAPK11	3
BP	GO:0007178	transmembrane receptor protein serine/threonine kinase signaling pathway	0.00230656	0.0136311	FKBP1A/PIN1/MAPK3/PRMT1/ABL1	5
BP	GO:0048863	stem cell differentiation	0.00233415	0.0137244	MAPK3/EZH2/ABL1/ERCC2	4
BP	GO:0033002	muscle cell proliferation	0.00236868	0.0138155	CDK1/IRAK1/MAPK11/ABL1	4
BP	GO:0045930	negative regulation of mitotic cell cycle	0.00240355	0.0138155	CDK1/AURKB/EZH2/ABL1	4
BP	GO:0019082	viral protein processing	0.00240896	0.0138155	GSK3A/PRMT1	2
BP	GO:0070498	interleukin-1-mediated signaling pathway	0.00240896	0.0138155	IRAK1/MAPK3	2
BP	GO:1903649	regulation of cytoplasmic transport	0.00240896	0.0138155	MAP2K2/MAPK3	2
BP	GO:0034502	protein localization to chromosome	0.00251104	0.0143303	CDK1/AURKB/EZH2	3
BP	GO:0016570	histone modification	0.00257136	0.014603	WDR5/AURKB/HDAC4	3
BP	GO:0045471	response to ethanol	0.00263258	0.014878	CDK1/NQO1/TYMS	3
BP	GO:0032212	positive regulation of telomere maintenance via telomerase	0.0027168	0.0151336	AURKB/MAPK3	2
BP	GO:0051973	positive regulation of telomerase activity	0.0027168	0.0151336	AURKB/MAPK3	2
BP	GO:1903955	positive regulation of protein targeting to mitochondrion	0.0027168	0.0151336	SAE1/GSK3A	2
BP	GO:0002065	columnar/cuboidal epithelial cell differentiation	0.0027577	0.0152158	GSK3A/TYMS/ABL1	3
BP	GO:0021761	limbic system development	0.0027577	0.0152158	CDK5/EZH2/XRCC1	3
BP	GO:0009314	response to radiation	0.00277729	0.0152517	CDK5/AURKB/GRB2/MAPK11/ERCC2	5
BP	GO:0043434	response to peptide hormone	0.0028336	0.0154878	GSK3A/HDAC5/GRB2/PRKCA/MAPK3	5
BP	GO:0008286	insulin receptor signaling pathway	0.00288644	0.0157029	GSK3A/GRB2/MAPK3	3
BP	GO:0003231	cardiac ventricle development	0.00301883	0.0162711	FKBP1A/MDM4/GSK3A	3
BP	GO:0051099	positive regulation of binding	0.00301883	0.0162711	FKBP1A/PIN1/ABL1	3
BP	GO:0060218	hematopoietic stem cell differentiation	0.00304216	0.0163212	ABL1/ERCC2	2
BP	GO:0007127	meiosis I	0.00315491	0.0168485	CCNE1/TOP2A/CDC25B	3
BP	GO:0046621	negative regulation of organ growth	0.00321136	0.0169645	GSK3A/MAPK11	2
BP	GO:1904358	positive regulation of telomere maintenance via telomere lengthening	0.00321136	0.0169645	AURKB/MAPK3	2
BP	GO:0032868	response to insulin	0.00322034	0.0169645	GSK3A/HDAC5/GRB2/MAPK3	4
BP	GO:0001503	ossification	0.00325127	0.0170503	RXRB/THRA/MAPK11/MAPK3/ERCC2	5
BP	GO:0030218	erythrocyte differentiation	0.00329471	0.0171238	THRA/PRMT1/ERCC2	3
BP	GO:0051983	regulation of chromosome segregation	0.00329471	0.0171238	CDK1/AURKB/CSNK2A1	3
BP	GO:0007143	female meiotic nuclear division	0.00338488	0.0174368	TOP2A/CDC25B	2
BP	GO:1903749	positive regulation of establishment of protein localization to mitochondrion	0.00338488	0.0174368	SAE1/GSK3A	2
BP	GO:0002244	hematopoietic progenitor cell differentiation	0.00343827	0.0175565	TOP2A/ABL1/ERCC2	3
BP	GO:0051225	spindle assembly	0.00343827	0.0175565	CSNK1D/KIF11/AURKB	3
BP	GO:0010975	regulation of neuron projection development	0.00354227	0.0179446	CDK5/MAP2K2/GSK3A/EZH2/ABL1	5
BP	GO:0014037	Schwann cell differentiation	0.0035627	0.0179446	CDK5/CDK1	2
BP	GO:0051438	regulation of ubiquitin-protein transferase activity	0.0035627	0.0179446	PIN1/ABL1	2
BP	GO:1901988	negative regulation of cell cycle phase transition	0.00357594	0.0179446	CDK1/AURKB/PKMYT1/EZH2	4
BP	GO:0042113	B cell activation	0.00362219	0.0180213	HDAC5/HDAC4/EZH2/ABL1	4
BP	GO:0051402	neuron apoptotic process	0.00362219	0.0180213	CDK5/MAP3K11/NQO1/ABL1	4
BP	GO:0018208	peptidyl-proline modification	0.00374481	0.0184735	FKBP1A/PIN1	2
BP	GO:0071459	protein localization to chromosome, centromeric region	0.00374481	0.0184735	CDK1/AURKB	2
BP	GO:0032259	methylation	0.00381128	0.0187221	WDR5/TYMS/EZH2/PRMT1	4
BP	GO:0043467	regulation of generation of precursor metabolites and energy	0.00389178	0.0190372	CDK1/GSK3A/HDAC4	3
BP	GO:0045454	cell redox homeostasis	0.00393118	0.0191495	APEX1/NQO1	2
BP	GO:0034101	erythrocyte homeostasis	0.00397073	0.0192615	THRA/PRMT1/ERCC2	3
BP	GO:0043405	regulation of MAP kinase activity	0.00413157	0.0199586	MAP3K11/IRAK1/EZH2	3
BP	GO:0006284	base-excision repair	0.00451567	0.0215171	APEX1/XRCC1	2
BP	GO:0045022	early endosome to late endosome transport	0.00451567	0.0215171	MAP2K2/MAPK3	2
BP	GO:0060428	lung epithelium development	0.00451567	0.0215171	MAP2K2/THRA	2
BP	GO:0043086	negative regulation of catalytic activity	0.00452812	0.0215171	FKBP1A/GSK3A/CSNK2A1/ABL1/XRCC1	5
BP	GO:0090092	regulation of transmembrane receptor protein serine/threonine kinase signaling pathway	0.00458017	0.021676	FKBP1A/PIN1/PRMT1/ABL1	4
BP	GO:1903214	regulation of protein targeting to mitochondrion	0.0047189	0.0221524	SAE1/GSK3A	2
BP	GO:1905521	regulation of macrophage migration	0.0047189	0.0221524	BCR/MAPK3	2
BP	GO:0051972	regulation of telomerase activity	0.00492629	0.0230331	AURKB/MAPK3	2
BP	GO:0009411	response to UV	0.00499514	0.0232616	AURKB/MAPK11/ERCC2	3
BP	GO:0043535	regulation of blood vessel endothelial cell migration	0.00508702	0.0233653	HDAC5/PRKCA/ABL1	3
BP	GO:0010830	regulation of myotube differentiation	0.00513783	0.0233653	HDAC5/HDAC4	2
BP	GO:0014075	response to amine	0.00513783	0.0233653	CDK1/NQO1	2
BP	GO:0030261	chromosome condensation	0.00513783	0.0233653	CDK1/TOP2A	2
BP	GO:0032467	positive regulation of cytokinesis	0.00513783	0.0233653	CDC25B/AURKB	2
BP	GO:0060043	regulation of cardiac muscle cell proliferation	0.00513783	0.0233653	CDK1/MAPK11	2
BP	GO:0051222	positive regulation of protein transport	0.00520643	0.0235851	SAE1/CDK5/CDK1/GSK3A	4
BP	GO:0007584	response to nutrient	0.00527385	0.0237979	RXRB/NQO1/TYMS	3
BP	GO:1902003	regulation of amyloid-beta formation	0.0053535	0.0240641	GSK3A/PIN1	2
BP	GO:0070372	regulation of ERK1 and ERK2 cascade	0.00550922	0.0246688	PIN1/PRKCA/MAPK3/ABL1	4
BP	GO:0042220	response to cocaine	0.00557327	0.0247651	CDK5/HDAC5	2
BP	GO:0098927	vesicle-mediated transport between endosomal compartments	0.00557327	0.0247651	MAP2K2/MAPK3	2
BP	GO:0009416	response to light stimulus	0.00582363	0.0257792	CDK5/AURKB/MAPK11/ERCC2	4
BP	GO:0010948	negative regulation of cell cycle process	0.00595268	0.0261403	CDK1/AURKB/PKMYT1/EZH2	4
BP	GO:0021695	cerebellar cortex development	0.00602508	0.0261403	CDK5/EZH2	2
BP	GO:0050885	neuromuscular process controlling balance	0.00602508	0.0261403	BCR/ABL1	2
BP	GO:1903747	regulation of establishment of protein localization to mitochondrion	0.00602508	0.0261403	SAE1/GSK3A	2
BP	GO:0007254	JNK cascade	0.00606236	0.0261403	MAP3K11/IRAK1/PRMT1	3
BP	GO:0050905	neuromuscular process	0.00606236	0.0261403	BCR/ABL1/XRCC1	3
BP	GO:1902850	microtubule cytoskeleton organization involved in mitosis	0.00606236	0.0261403	CDK1/KIF11/AURKB	3
BP	GO:1904951	positive regulation of establishment of protein localization	0.00621652	0.0266019	SAE1/CDK5/CDK1/GSK3A	4
BP	GO:0002066	columnar/cuboidal epithelial cell development	0.00625707	0.0266019	GSK3A/TYMS	2
BP	GO:0060324	face development	0.00625707	0.0266019	MAP2K2/MAPK3	2
BP	GO:0035051	cardiocyte differentiation	0.00626992	0.0266019	CDK1/GSK3A/MAPK3	3
BP	GO:0031647	regulation of protein stability	0.00628368	0.0266019	CDK7/MDM4/PIN1/CSNK2A1	4
BP	GO:0030509	BMP signaling pathway	0.00648169	0.02729	MAPK3/PRMT1/ABL1	3
BP	GO:0032210	regulation of telomere maintenance via telomerase	0.00649309	0.02729	AURKB/MAPK3	2
BP	GO:0003205	cardiac chamber development	0.00658916	0.0275941	FKBP1A/MDM4/GSK3A	3
BP	GO:0033047	regulation of mitotic sister chromatid segregation	0.00673313	0.0279956	CDK1/AURKB	2
BP	GO:0060425	lung morphogenesis	0.00673313	0.0279956	MAP2K2/MAPK3	2
BP	GO:0071214	cellular response to abiotic stimulus	0.00691003	0.0285274	AURKB/GRB2/MAPK11/MAPK3	4
BP	GO:0104004	cellular response to environmental stimulus	0.00691003	0.0285274	AURKB/GRB2/MAPK11/MAPK3	4
BP	GO:0014888	striated muscle adaptation	0.00697716	0.0286017	HDAC4/EZH2	2
BP	GO:0072698	protein localization to microtubule cytoskeleton	0.00697716	0.0286017	CSNK1D/ABL1	2
BP	GO:0002262	myeloid cell homeostasis	0.00714251	0.0291768	THRA/PRMT1/ERCC2	3
BP	GO:0034205	amyloid-beta formation	0.00722517	0.0293088	GSK3A/PIN1	2
BP	GO:0045912	negative regulation of carbohydrate metabolic process	0.00722517	0.0293088	GSK3A/HDAC4	2
BP	GO:0072331	signal transduction by p53 class mediator	0.00737136	0.029798	MDM4/AURKB/ERCC2	3
BP	GO:0038066	p38MAPK cascade	0.00747714	0.0300583	MAPK11/PRMT1	2
BP	GO:0043409	negative regulation of MAPK cascade	0.0074874	0.0300583	PIN1/PRMT1/ABL1	3
BP	GO:2000058	regulation of ubiquitin-dependent protein catabolic process	0.00772274	0.0308319	CSNK1D/GSK3A/CSNK2A1	3
BP	GO:0006476	protein deacetylation	0.00773305	0.0308319	WDR5/HDAC4	2
BP	GO:0071772	response to BMP	0.00784204	0.0309484	MAPK3/PRMT1/ABL1	3
BP	GO:0071773	cellular response to BMP stimulus	0.00784204	0.0309484	MAPK3/PRMT1/ABL1	3
BP	GO:0090101	negative regulation of transmembrane receptor protein serine/threonine kinase signaling pathway	0.00784204	0.0309484	FKBP1A/PIN1/ABL1	3
BP	GO:0044380	protein localization to cytoskeleton	0.00799289	0.0313313	CSNK1D/ABL1	2
BP	GO:0046686	response to cadmium ion	0.00799289	0.0313313	CDK1/MAPK3	2
BP	GO:0043534	blood vessel endothelial cell migration	0.00808391	0.0314762	HDAC5/PRKCA/ABL1	3
BP	GO:0071478	cellular response to radiation	0.00808391	0.0314762	AURKB/GRB2/MAPK11	3
BP	GO:0030522	intracellular receptor signaling pathway	0.00836571	0.0324648	IRAK1/RXRB/THRA/EZH2	4
BP	GO:0000070	mitotic sister chromatid segregation	0.00845493	0.032666	CDK1/KIF11/AURKB	3
BP	GO:1904356	regulation of telomere maintenance via telomere lengthening	0.00852425	0.032666	AURKB/MAPK3	2
BP	GO:1905517	macrophage migration	0.00852425	0.032666	BCR/MAPK3	2
BP	GO:0010506	regulation of autophagy	0.00852978	0.032666	CDK5/GSK3A/MAPK3/ABL1	4
BP	GO:0090287	regulation of cellular response to growth factor stimulus	0.00869595	0.0331932	FKBP1A/PIN1/PRMT1/ABL1	4
BP	GO:0010038	response to metal ion	0.00886423	0.0337249	CDK1/NQO1/GSK3A/MAPK3	4
BP	GO:0000910	cytokinesis	0.00896504	0.0337773	CDC25B/AURKB/PIN1	3
BP	GO:0006109	regulation of carbohydrate metabolic process	0.00896504	0.0337773	WDR5/GSK3A/HDAC4	3
BP	GO:0030324	lung development	0.00896504	0.0337773	MAP2K2/THRA/MAPK3	3
BP	GO:0043470	regulation of carbohydrate catabolic process	0.00907107	0.0340666	GSK3A/HDAC4	2
BP	GO:0021543	pallium development	0.00935927	0.0350359	CDK5/EZH2/XRCC1	3
BP	GO:0030323	respiratory tube development	0.00949291	0.0354223	MAP2K2/THRA/MAPK3	3
BP	GO:0050435	amyloid-beta metabolic process	0.00963323	0.035831	GSK3A/PIN1	2
BP	GO:0071897	DNA biosynthetic process	0.00976354	0.0360851	AURKB/TYMS/MAPK3	3
BP	GO:0140013	meiotic nuclear division	0.00976354	0.0360851	CCNE1/TOP2A/CDC25B	3
BP	GO:0048469	cell maturation	0.00990054	0.0364757	CDC25B/TYMS/ERCC2	3
BP	GO:0043123	positive regulation of canonical NF-kappaB signal transduction	0.0100387	0.0367519	FKBP1A/IRAK1/ABL1	3
BP	GO:1901991	negative regulation of mitotic cell cycle phase transition	0.0100387	0.0367519	CDK1/AURKB/EZH2	3
BP	GO:0010611	regulation of cardiac muscle hypertrophy	0.0102106	0.0369169	GSK3A/PRKCA	2
BP	GO:0010972	negative regulation of G2/M transition of mitotic cell cycle	0.0102106	0.0369169	CDK1/AURKB	2
BP	GO:0035601	protein deacylation	0.0102106	0.0369169	WDR5/HDAC4	2
BP	GO:0048645	animal organ formation	0.0102106	0.0369169	MAP2K2/MAPK3	2
BP	GO:0002520	immune system development	0.0104598	0.0376304	MAP2K2/MAPK3/ABL1	3
BP	GO:0016925	protein sumoylation	0.0105049	0.0376304	SAE1/HDAC4	2
BP	GO:0035567	non-canonical Wnt signaling pathway	0.0105049	0.0376304	CSNK1D/ABL1	2
BP	GO:0071248	cellular response to metal ion	0.0106024	0.0378633	NQO1/GSK3A/MAPK3	3
BP	GO:0007004	telomere maintenance via telomerase	0.0108029	0.0383442	AURKB/MAPK3	2
BP	GO:2000573	positive regulation of DNA biosynthetic process	0.0108029	0.0383442	AURKB/MAPK3	2
BP	GO:0007051	spindle organization	0.0108911	0.0385395	CSNK1D/KIF11/AURKB	3
BP	GO:0014743	regulation of muscle hypertrophy	0.0111047	0.0389404	GSK3A/PRKCA	2
BP	GO:0032206	positive regulation of telomere maintenance	0.0111047	0.0389404	AURKB/MAPK3	2
BP	GO:0098732	macromolecule deacylation	0.0111047	0.0389404	WDR5/HDAC4	2
BP	GO:0003208	cardiac ventricle morphogenesis	0.0114102	0.0397721	FKBP1A/GSK3A	2
BP	GO:0090307	mitotic spindle assembly	0.0114102	0.0397721	KIF11/AURKB	2
BP	GO:0051216	cartilage development	0.0116326	0.040306	THRA/TYMS/MAPK3	3
BP	GO:2000241	regulation of reproductive process	0.0116326	0.040306	CDC25C/CDC25B/PKMYT1	3
BP	GO:0014823	response to activity	0.0117194	0.0404861	CDK1/HDAC5	2
BP	GO:1903351	cellular response to dopamine	0.0120322	0.0414022	GSK3A/ABL1	2
BP	GO:0043414	macromolecule methylation	0.0120912	0.0414022	WDR5/EZH2/PRMT1	3
BP	GO:0045732	positive regulation of protein catabolic process	0.0120912	0.0414022	CSNK1D/GSK3A/CSNK2A1	3
BP	GO:0032007	negative regulation of TOR signaling	0.0123487	0.041914	GSK3A/MAPK3	2
BP	GO:1903350	response to dopamine	0.0123487	0.041914	GSK3A/ABL1	2
BP	GO:1905818	regulation of chromosome separation	0.0123487	0.041914	AURKB/CSNK2A1	2
BP	GO:0006278	RNA-templated DNA biosynthetic process	0.0126688	0.0428756	AURKB/MAPK3	2
BP	GO:0060541	respiratory system development	0.0127188	0.04292	MAP2K2/THRA/MAPK3	3
BP	GO:0043536	positive regulation of blood vessel endothelial cell migration	0.0129926	0.0437171	PRKCA/ABL1	2
BP	GO:0032091	negative regulation of protein binding	0.0133199	0.0442032	AURKB/PIN1	2
BP	GO:0035304	regulation of protein dephosphorylation	0.0133199	0.0442032	FKBP1A/PIN1	2
BP	GO:0050853	B cell receptor signaling pathway	0.0133199	0.0442032	GRB2/ABL1	2
BP	GO:0070373	negative regulation of ERK1 and ERK2 cascade	0.0133199	0.0442032	PIN1/ABL1	2
BP	GO:0051346	negative regulation of hydrolase activity	0.0133649	0.0442032	FKBP1A/CSNK2A1/ABL1	3
BP	GO:0070374	positive regulation of ERK1 and ERK2 cascade	0.0133649	0.0442032	PRKCA/MAPK3/ABL1	3
BP	GO:0018205	peptidyl-lysine modification	0.0135293	0.0446201	SAE1/WDR5/HDAC4	3
BP	GO:0019233	sensory perception of pain	0.0136509	0.0446418	CDK5/MAPK3	2
BP	GO:0031397	negative regulation of protein ubiquitination	0.0136509	0.0446418	CDK5/ABL1	2
BP	GO:2000736	regulation of stem cell differentiation	0.0136509	0.0446418	EZH2/ABL1	2
BP	GO:0032508	DNA duplex unwinding	0.0139854	0.0456076	TOP2A/ERCC2	2
BP	GO:0006479	protein methylation	0.0143234	0.0463208	WDR5/PRMT1	2
BP	GO:0008213	protein alkylation	0.0143234	0.0463208	WDR5/PRMT1	2
BP	GO:0090049	regulation of cell migration involved in sprouting angiogenesis	0.0143234	0.0463208	HDAC5/ABL1	2
BP	GO:0051348	negative regulation of transferase activity	0.0145401	0.0468911	GSK3A/ABL1/XRCC1	3
BP	GO:0007422	peripheral nervous system development	0.014665	0.0469043	CDK5/CDK1	2
BP	GO:0010833	telomere maintenance via telomere lengthening	0.014665	0.0469043	AURKB/MAPK3	2
BP	GO:0051304	chromosome separation	0.014665	0.0469043	AURKB/CSNK2A1	2
BP	GO:0001558	regulation of cell growth	0.0147112	0.0469231	CDK5/GSK3A/CSNK2A1/ABL1	4
BP	GO:0060337	type I interferon-mediated signaling pathway	0.0150101	0.0477457	IRAK1/HDAC4	2
BP	GO:0071241	cellular response to inorganic substance	0.0152372	0.0483264	NQO1/GSK3A/MAPK3	3
BP	GO:0035023	regulation of Rho protein signal transduction	0.0153587	0.0483264	BCR/ABL1	2
BP	GO:0051279	regulation of release of sequestered calcium ion into cytosol	0.0153587	0.0483264	FKBP1A/ABL1	2
BP	GO:0071357	cellular response to type I interferon	0.0153587	0.0483264	IRAK1/HDAC4	2
BP	GO:0002685	regulation of leukocyte migration	0.0154144	0.048371	BCR/MAPK3/ABL1	3
BP	GO:0010594	regulation of endothelial cell migration	0.0155928	0.0487993	HDAC5/PRKCA/ABL1	3
BP	GO:0048678	response to axon injury	0.0157108	0.0490366	CDK1/MAP2K2	2
BP	GO:0016358	dendrite development	0.0159531	0.049483	CDK5/EZH2/ABL1	3
BP	GO:0008306	associative learning	0.0160663	0.049483	CDK5/ABL1	2
BP	GO:0032392	DNA geometric change	0.0160663	0.049483	TOP2A/ERCC2	2
BP	GO:0034103	regulation of tissue remodeling	0.0160663	0.049483	BCR/PRKCA	2
BP	GO:0048041	focal adhesion assembly	0.0160663	0.049483	BCR/ABL1	2
BP	GO:0072593	reactive oxygen species metabolic process	0.016135	0.0495279	BCR/NQO1/GRB2	3
BP	GO:0030098	lymphocyte differentiation	0.016166	0.0495279	HDAC5/HDAC4/EZH2/ABL1	4
BP	GO:0030099	myeloid cell differentiation	0.0162912	0.0496689	THRA/PRKCA/PRMT1/ERCC2	4
BP	GO:1903050	regulation of proteolysis involved in protein catabolic process	0.0163181	0.0496689	CSNK1D/GSK3A/CSNK2A1	3
BP	GO:0033273	response to vitamin	0.0164253	0.0496689	RXRB/TYMS	2
BP	GO:0055013	cardiac muscle cell development	0.0164253	0.0496689	CDK1/GSK3A	2
BP	GO:2000243	positive regulation of reproductive process	0.0164253	0.0496689	CDC25C/CDC25B	2
BP	GO:0016032	viral process	0.0165434	0.0498963	CDK1/TOP2A/GSK3A/PRMT1	4
BP	GO:0051651	maintenance of location in cell	0.0166878	0.050114	CDK5/FKBP1A/ABL1	3
BP	GO:0048708	astrocyte differentiation	0.0167877	0.050114	MAPK3/ABL1	2
BP	GO:0071868	cellular response to monoamine stimulus	0.0167877	0.050114	GSK3A/ABL1	2
BP	GO:0071870	cellular response to catecholamine stimulus	0.0167877	0.050114	GSK3A/ABL1	2
BP	GO:0007160	cell-matrix adhesion	0.0170622	0.0505444	CDK5/BCR/ABL1	3
BP	GO:0043547	positive regulation of GTPase activity	0.0170622	0.0505444	BCR/PIN1/EZH2	3
BP	GO:0048588	developmental cell growth	0.0170622	0.0505444	CDK5/GSK3A/ABL1	3
BP	GO:0032147	activation of protein kinase activity	0.0171536	0.0506862	IRAK1/ABL1	2
BP	GO:0034340	response to type I interferon	0.0175228	0.0516462	IRAK1/HDAC4	2
BP	GO:0034644	cellular response to UV	0.0178954	0.0522156	AURKB/MAPK11	2
BP	GO:0071867	response to monoamine	0.0178954	0.0522156	GSK3A/ABL1	2
BP	GO:0071869	response to catecholamine	0.0178954	0.0522156	GSK3A/ABL1	2
BP	GO:1903321	negative regulation of protein modification by small protein conjugation or removal	0.0178954	0.0522156	CDK5/ABL1	2
BP	GO:0051091	positive regulation of DNA-binding transcription factor activity	0.0180188	0.0524441	IRAK1/HDAC5/HDAC4	3
BP	GO:0009913	epidermal cell differentiation	0.0182136	0.052879	BCR/EZH2/ERCC2	3
BP	GO:0034329	cell junction assembly	0.0183781	0.0532238	CDK5/BCR/PRKCA/ABL1	4
BP	GO:0045926	negative regulation of growth	0.0186069	0.0536132	CDK5/GSK3A/MAPK11	3
BP	GO:0090257	regulation of muscle system process	0.0186069	0.0536132	GSK3A/HDAC4/PRKCA	3
BP	GO:0030516	regulation of axon extension	0.0186507	0.0536132	CDK5/ABL1	2
BP	GO:0032436	positive regulation of proteasomal ubiquitin-dependent protein catabolic process	0.0190334	0.0543109	CSNK1D/GSK3A	2
BP	GO:0045995	regulation of embryonic development	0.0190334	0.0543109	CDK1/WDR5	2
BP	GO:0055006	cardiac cell development	0.0190334	0.0543109	CDK1/GSK3A	2
BP	GO:0003012	muscle system process	0.0192019	0.0546578	GSK3A/HDAC4/PRKCA/EZH2	4
BP	GO:0048568	embryonic organ development	0.0193414	0.0547414	BCR/GRB2/MAPK3/ERCC2	4
BP	GO:0009791	post-embryonic development	0.0194193	0.0547414	ABL1/ERCC2	2
BP	GO:0046785	microtubule polymerization	0.0194193	0.0547414	CSNK1D/ABL1	2
BP	GO:0051781	positive regulation of cell division	0.0194193	0.0547414	CDC25B/AURKB	2
BP	GO:0007044	cell-substrate junction assembly	0.0198086	0.0557039	BCR/ABL1	2
BP	GO:0097305	response to alcohol	0.0200206	0.0561643	CDK1/NQO1/TYMS	3
BP	GO:0002042	cell migration involved in sprouting angiogenesis	0.0202012	0.0565346	HDAC5/ABL1	2
BP	GO:1901874	negative regulation of post-translational protein modification	0.020597	0.0575041	CDK5/ABL1	2
BP	GO:0009636	response to toxic substance	0.0208545	0.0579453	CDK1/NQO1/TYMS	3
BP	GO:1903522	regulation of blood circulation	0.0208545	0.0579453	THRA/GSK3A/ABL1	3
BP	GO:0050773	regulation of dendrite development	0.0213983	0.0593147	EZH2/ABL1	2
BP	GO:0071695	anatomical structure maturation	0.0214924	0.059434	CDC25B/TYMS/ERCC2	3
BP	GO:0060828	regulation of canonical Wnt signaling pathway	0.0217075	0.0598864	CSNK1D/GSK3A/PIN1	3
BP	GO:0003007	heart morphogenesis	0.022141	0.0601362	FKBP1A/MDM4/GSK3A	3
BP	GO:0043122	regulation of canonical NF-kappaB signal transduction	0.0223596	0.0601362	FKBP1A/IRAK1/ABL1	3
BP	GO:0002934	desmosome organization	0.0225606	0.0601362	PRKCA	1
BP	GO:0006283	transcription-coupled nucleotide-excision repair	0.0225606	0.0601362	ERCC2	1
BP	GO:0018195	peptidyl-arginine modification	0.0225606	0.0601362	PRMT1	1
BP	GO:0031666	positive regulation of lipopolysaccharide-mediated signaling pathway	0.0225606	0.0601362	PRKCA	1
BP	GO:0034351	negative regulation of glial cell apoptotic process	0.0225606	0.0601362	PRKCA	1
BP	GO:0042373	vitamin K metabolic process	0.0225606	0.0601362	NQO1	1
BP	GO:0051081	nuclear membrane disassembly	0.0225606	0.0601362	PRKCA	1
BP	GO:0055015	ventricular cardiac muscle cell development	0.0225606	0.0601362	CDK1	1
BP	GO:0060502	epithelial cell proliferation involved in lung morphogenesis	0.0225606	0.0601362	MAP2K2	1
BP	GO:0070562	regulation of vitamin D receptor signaling pathway	0.0225606	0.0601362	RXRB	1
BP	GO:0070874	negative regulation of glycogen metabolic process	0.0225606	0.0601362	GSK3A	1
BP	GO:1902460	regulation of mesenchymal stem cell proliferation	0.0225606	0.0601362	CCNE1	1
BP	GO:0019080	viral gene expression	0.0226245	0.0601362	GSK3A/PRMT1	2
BP	GO:0150115	cell-substrate junction organization	0.0226245	0.0601362	BCR/ABL1	2
BP	GO:1903829	positive regulation of protein localization	0.0227262	0.060269	SAE1/CDK5/CDK1/GSK3A	4
BP	GO:0006304	DNA modification	0.0230395	0.0606853	APEX1/EZH2	2
BP	GO:0010906	regulation of glucose metabolic process	0.0230395	0.0606853	WDR5/GSK3A	2
BP	GO:0045639	positive regulation of myeloid cell differentiation	0.0230395	0.0606853	PRKCA/PRMT1	2
BP	GO:0033045	regulation of sister chromatid segregation	0.0234578	0.0616381	CDK1/AURKB	2
BP	GO:1903131	mononuclear cell differentiation	0.0235072	0.0616381	HDAC5/HDAC4/EZH2/ABL1	4
BP	GO:0043255	regulation of carbohydrate biosynthetic process	0.0238791	0.0619311	WDR5/GSK3A	2
BP	GO:0006626	protein targeting to mitochondrion	0.0243036	0.0619311	SAE1/GSK3A	2
BP	GO:0035303	regulation of dephosphorylation	0.0243036	0.0619311	FKBP1A/PIN1	2
BP	GO:0048709	oligodendrocyte differentiation	0.0243036	0.0619311	CDK5/ERCC2	2
BP	GO:0007611	learning or memory	0.0243803	0.0619311	CDK5/THRA/ABL1	3
BP	GO:0007173	epidermal growth factor receptor signaling pathway	0.0247312	0.0619311	GRB2/ABL1	2
BP	GO:0048144	fibroblast proliferation	0.0247312	0.0619311	CDK1/ABL1	2
BP	GO:0060079	excitatory postsynaptic potential	0.0247312	0.0619311	CDK5/GSK3A	2
BP	GO:0140888	interferon-mediated signaling pathway	0.0247312	0.0619311	IRAK1/HDAC4	2
BP	GO:0002887	negative regulation of myeloid leukocyte mediated immunity	0.0247891	0.0619311	BCR	1
BP	GO:0006349	regulation of gene expression by genomic imprinting	0.0247891	0.0619311	GSK3A	1
BP	GO:0008063	Toll signaling pathway	0.0247891	0.0619311	IRAK1	1
BP	GO:0030397	membrane disassembly	0.0247891	0.0619311	PRKCA	1
BP	GO:0034350	regulation of glial cell apoptotic process	0.0247891	0.0619311	PRKCA	1
BP	GO:0046501	protoporphyrinogen IX metabolic process	0.0247891	0.0619311	HMBS	1
BP	GO:0051256	mitotic spindle midzone assembly	0.0247891	0.0619311	AURKB	1
BP	GO:0051593	response to folic acid	0.0247891	0.0619311	TYMS	1
BP	GO:0051987	positive regulation of attachment of spindle microtubules to kinetochore	0.0247891	0.0619311	AURKB	1
BP	GO:0072584	caveolin-mediated endocytosis	0.0247891	0.0619311	MAPK3	1
BP	GO:0097168	mesenchymal stem cell proliferation	0.0247891	0.0619311	CCNE1	1
BP	GO:1902412	regulation of mitotic cytokinesis	0.0247891	0.0619311	AURKB	1
BP	GO:0050804	modulation of chemical synaptic transmission	0.0247907	0.0619311	CDK5/BCR/MAPK3/ABL1	4
BP	GO:0021537	telencephalon development	0.0248424	0.0619311	CDK5/EZH2/XRCC1	3
BP	GO:0099177	regulation of trans-synaptic signaling	0.0249541	0.0620765	CDK5/BCR/MAPK3/ABL1	4
BP	GO:0046822	regulation of nucleocytoplasmic transport	0.0255957	0.0634016	CDK5/CDK1	2
BP	GO:0061387	regulation of extent of cell growth	0.0255957	0.0634016	CDK5/ABL1	2
BP	GO:0031667	response to nutrient levels	0.0257809	0.063404	RXRB/NQO1/TYMS/MAPK3	4
BP	GO:0031398	positive regulation of protein ubiquitination	0.0260325	0.063404	GSK3A/PIN1	2
BP	GO:0090263	positive regulation of canonical Wnt signaling pathway	0.0260325	0.063404	CSNK1D/PIN1	2
BP	GO:0090398	cellular senescence	0.0260325	0.063404	MAPK11/ABL1	2
BP	GO:0016049	cell growth	0.0261163	0.063404	CDK5/GSK3A/CSNK2A1/ABL1	4
BP	GO:0022411	cellular component disassembly	0.0261163	0.063404	CDK1/TOP2A/GSK3A/PRKCA	4
BP	GO:0030512	negative regulation of transforming growth factor beta receptor signaling pathway	0.0264723	0.063404	FKBP1A/PIN1	2
BP	GO:0043542	endothelial cell migration	0.0267385	0.063404	HDAC5/PRKCA/ABL1	3
BP	GO:0006367	transcription initiation at RNA polymerase II promoter	0.0269152	0.063404	CDK7/THRA	2
BP	GO:0061448	connective tissue development	0.0269808	0.063404	THRA/TYMS/MAPK3	3
BP	GO:0000022	mitotic spindle elongation	0.0270126	0.063404	AURKB	1
BP	GO:0002327	immature B cell differentiation	0.0270126	0.063404	ABL1	1
BP	GO:0009176	pyrimidine deoxyribonucleoside monophosphate metabolic process	0.0270126	0.063404	TYMS	1
BP	GO:0009650	UV protection	0.0270126	0.063404	ERCC2	1
BP	GO:0010944	negative regulation of transcription by competitive promoter binding	0.0270126	0.063404	HDAC4	1
BP	GO:0014854	response to inactivity	0.0270126	0.063404	HDAC4	1
BP	GO:0043312	neutrophil degranulation	0.0270126	0.063404	BCR	1
BP	GO:0060312	regulation of blood vessel remodeling	0.0270126	0.063404	BCR	1
BP	GO:0070561	vitamin D receptor signaling pathway	0.0270126	0.063404	RXRB	1
BP	GO:0071236	cellular response to antibiotic	0.0270126	0.063404	EZH2	1
BP	GO:0071493	cellular response to UV-B	0.0270126	0.063404	MAPK11	1
BP	GO:0090232	positive regulation of spindle checkpoint	0.0270126	0.063404	AURKB	1
BP	GO:0090267	positive regulation of mitotic cell cycle spindle assembly checkpoint	0.0270126	0.063404	AURKB	1
BP	GO:1901030	positive regulation of mitochondrial outer membrane permeabilization involved in apoptotic signaling pathway	0.0270126	0.063404	GSK3A	1
BP	GO:1904338	regulation of dopaminergic neuron differentiation	0.0270126	0.063404	CSNK1D	1
BP	GO:1904953	Wnt signaling pathway involved in midbrain dopaminergic neuron differentiation	0.0270126	0.063404	CSNK1D	1
BP	GO:0051258	protein polymerization	0.0272244	0.0637724	CSNK1D/GRB2/ABL1	3
BP	GO:0032355	response to estradiol	0.0273611	0.0638359	NQO1/EZH2	2
BP	GO:2000060	positive regulation of ubiquitin-dependent protein catabolic process	0.0273611	0.0638359	CSNK1D/GSK3A	2
BP	GO:0071560	cellular response to transforming growth factor beta stimulus	0.0274691	0.0639596	FKBP1A/PIN1/ABL1	3
BP	GO:0062014	negative regulation of small molecule metabolic process	0.0282619	0.0651941	GSK3A/HDAC4	2
BP	GO:0099565	chemical synaptic transmission, postsynaptic	0.0282619	0.0651941	CDK5/GSK3A	2
BP	GO:0071559	response to transforming growth factor beta	0.0289624	0.0651941	FKBP1A/PIN1/ABL1	3
BP	GO:1901800	positive regulation of proteasomal protein catabolic process	0.0291746	0.0651941	CSNK1D/GSK3A	2
BP	GO:2000278	regulation of DNA biosynthetic process	0.0291746	0.0651941	AURKB/MAPK3	2
BP	GO:0002069	columnar/cuboidal epithelial cell maturation	0.0292312	0.0651941	TYMS	1
BP	GO:0007144	female meiosis I	0.0292312	0.0651941	CDC25B	1
BP	GO:0014874	response to stimulus involved in regulation of muscle adaptation	0.0292312	0.0651941	HDAC4	1
BP	GO:0033690	positive regulation of osteoblast proliferation	0.0292312	0.0651941	ABL1	1
BP	GO:0043301	negative regulation of leukocyte degranulation	0.0292312	0.0651941	BCR	1
BP	GO:0045956	positive regulation of calcium ion-dependent exocytosis	0.0292312	0.0651941	CDK5	1
BP	GO:0051569	regulation of histone H3-K4 methylation	0.0292312	0.0651941	WDR5	1
BP	GO:0051571	positive regulation of histone H3-K4 methylation	0.0292312	0.0651941	WDR5	1
BP	GO:0060670	branching involved in labyrinthine layer morphogenesis	0.0292312	0.0651941	GRB2	1
BP	GO:0061052	negative regulation of cell growth involved in cardiac muscle cell development	0.0292312	0.0651941	GSK3A	1
BP	GO:0061517	macrophage proliferation	0.0292312	0.0651941	MAPK3	1
BP	GO:0071285	cellular response to lithium ion	0.0292312	0.0651941	GSK3A	1
BP	GO:0090235	regulation of metaphase plate congression	0.0292312	0.0651941	AURKB	1
BP	GO:0140719	constitutive heterochromatin formation	0.0292312	0.0651941	EZH2	1
BP	GO:1900095	regulation of dosage compensation by inactivation of X chromosome	0.0292312	0.0651941	WDR5	1
BP	GO:1900272	negative regulation of long-term synaptic potentiation	0.0292312	0.0651941	ABL1	1
BP	GO:1905244	regulation of modification of synaptic structure	0.0292312	0.0651941	ABL1	1
BP	GO:0010632	regulation of epithelial cell migration	0.0294696	0.0656	HDAC5/PRKCA/ABL1	3
BP	GO:0007249	canonical NF-kappaB signal transduction	0.0307584	0.0674286	FKBP1A/IRAK1/ABL1	3
BP	GO:0030278	regulation of ossification	0.031035	0.0674286	RXRB/MAPK3	2
BP	GO:0030510	regulation of BMP signaling pathway	0.031035	0.0674286	PRMT1/ABL1	2
BP	GO:0048675	axon extension	0.031035	0.0674286	CDK5/ABL1	2
BP	GO:0051100	negative regulation of binding	0.031035	0.0674286	AURKB/PIN1	2
BP	GO:0000722	telomere maintenance via recombination	0.0314449	0.0674286	XRCC1	1
BP	GO:0006287	base-excision repair, gap-filling	0.0314449	0.0674286	APEX1	1
BP	GO:0007100	mitotic centrosome separation	0.0314449	0.0674286	KIF11	1
BP	GO:0021819	layer formation in cerebral cortex	0.0314449	0.0674286	CDK5	1
BP	GO:0035791	platelet-derived growth factor receptor-beta signaling pathway	0.0314449	0.0674286	ABL1	1
BP	GO:0042541	hemoglobin biosynthetic process	0.0314449	0.0674286	PRMT1	1
BP	GO:0045605	negative regulation of epidermal cell differentiation	0.0314449	0.0674286	EZH2	1
BP	GO:0045683	negative regulation of epidermis development	0.0314449	0.0674286	EZH2	1
BP	GO:0048148	behavioral response to cocaine	0.0314449	0.0674286	CDK5	1
BP	GO:0051255	spindle midzone assembly	0.0314449	0.0674286	AURKB	1
BP	GO:0055012	ventricular cardiac muscle cell differentiation	0.0314449	0.0674286	CDK1	1
BP	GO:0071871	response to epinephrine	0.0314449	0.0674286	ABL1	1
BP	GO:0098792	xenophagy	0.0314449	0.0674286	MAPK3	1
BP	GO:1905522	negative regulation of macrophage migration	0.0314449	0.0674286	BCR	1
BP	GO:0021782	glial cell development	0.0315073	0.0674286	CDK5/ERCC2	2
BP	GO:0032874	positive regulation of stress-activated MAPK cascade	0.0315073	0.0674286	MAP3K11/PRMT1	2
BP	GO:0030282	bone mineralization	0.0319825	0.0681949	RXRB/ERCC2	2
BP	GO:0071482	cellular response to light stimulus	0.0319825	0.0681949	AURKB/MAPK11	2
BP	GO:0038127	ERBB signaling pathway	0.0324606	0.068836	GRB2/ABL1	2
BP	GO:0070304	positive regulation of stress-activated protein kinase signaling cascade	0.0324606	0.068836	MAP3K11/PRMT1	2
BP	GO:0072655	establishment of protein localization to mitochondrion	0.0324606	0.068836	SAE1/GSK3A	2
BP	GO:0006302	double-strand break repair	0.0326124	0.0689068	TDP1/ABL1/XRCC1	3
BP	GO:0043087	regulation of GTPase activity	0.0326124	0.0689068	BCR/PIN1/EZH2	3
BP	GO:0071675	regulation of mononuclear cell migration	0.0329415	0.0689787	MAPK3/ABL1	2
BP	GO:0072089	stem cell proliferation	0.0329415	0.0689787	CCNE1/ERCC2	2
BP	GO:0034504	protein localization to nucleus	0.0334246	0.0689787	CDK5/CDK1/PIN1	3
BP	GO:0042471	ear morphogenesis	0.0334252	0.0689787	BCR/MAPK3	2
BP	GO:0001768	establishment of T cell polarity	0.0336536	0.0689787	ABL1	1
BP	GO:0009263	deoxyribonucleotide biosynthetic process	0.0336536	0.0689787	TYMS	1
BP	GO:0009265	2'-deoxyribonucleotide biosynthetic process	0.0336536	0.0689787	TYMS	1
BP	GO:0010226	response to lithium ion	0.0336536	0.0689787	GSK3A	1
BP	GO:0033189	response to vitamin A	0.0336536	0.0689787	TYMS	1
BP	GO:0046385	deoxyribose phosphate biosynthetic process	0.0336536	0.0689787	TYMS	1
BP	GO:0048820	hair follicle maturation	0.0336536	0.0689787	ERCC2	1
BP	GO:0051299	centrosome separation	0.0336536	0.0689787	KIF11	1
BP	GO:0051444	negative regulation of ubiquitin-protein transferase activity	0.0336536	0.0689787	ABL1	1
BP	GO:0060347	heart trabecula formation	0.0336536	0.0689787	FKBP1A	1
BP	GO:0061307	cardiac neural crest cell differentiation involved in heart development	0.0336536	0.0689787	MAPK3	1
BP	GO:0061308	cardiac neural crest cell development involved in heart development	0.0336536	0.0689787	MAPK3	1
BP	GO:1902563	regulation of neutrophil activation	0.0336536	0.0689787	BCR	1
BP	GO:0003206	cardiac chamber morphogenesis	0.0339117	0.0691424	FKBP1A/GSK3A	2
BP	GO:0051384	response to glucocorticoid	0.0339117	0.0691424	GSK3A/TYMS	2
BP	GO:1903305	regulation of regulated secretory pathway	0.0339117	0.0691424	CDK5/BCR	2
BP	GO:0060070	canonical Wnt signaling pathway	0.0350808	0.0699397	CSNK1D/GSK3A/PIN1	3
BP	GO:0043588	skin development	0.0353609	0.0699397	BCR/EZH2/ERCC2	3
BP	GO:0050890	cognition	0.0353609	0.0699397	CDK5/THRA/ABL1	3
BP	GO:0007052	mitotic spindle organization	0.0353879	0.0699397	KIF11/AURKB	2
BP	GO:0010595	positive regulation of endothelial cell migration	0.0353879	0.0699397	PRKCA/ABL1	2
BP	GO:0014902	myotube differentiation	0.0353879	0.0699397	HDAC5/HDAC4	2
BP	GO:0002429	immune response-activating cell surface receptor signaling pathway	0.0356422	0.0699397	IRAK1/GRB2/ABL1	3
BP	GO:0001767	establishment of lymphocyte polarity	0.0358575	0.0699397	ABL1	1
BP	GO:0002903	negative regulation of B cell apoptotic process	0.0358575	0.0699397	AURKB	1
BP	GO:0003214	cardiac left ventricle morphogenesis	0.0358575	0.0699397	GSK3A	1
BP	GO:0006206	pyrimidine nucleobase metabolic process	0.0358575	0.0699397	TYMS	1
BP	GO:0007250	activation of NF-kappaB-inducing kinase activity	0.0358575	0.0699397	IRAK1	1
BP	GO:0009130	pyrimidine nucleoside monophosphate biosynthetic process	0.0358575	0.0699397	TYMS	1
BP	GO:0016114	terpenoid biosynthetic process	0.0358575	0.0699397	GGPS1	1
BP	GO:0031062	positive regulation of histone methylation	0.0358575	0.0699397	WDR5	1
BP	GO:0032926	negative regulation of activin receptor signaling pathway	0.0358575	0.0699397	FKBP1A	1
BP	GO:0034349	glial cell apoptotic process	0.0358575	0.0699397	PRKCA	1
BP	GO:0042795	snRNA transcription by RNA polymerase II	0.0358575	0.0699397	CDK7	1
BP	GO:0045651	positive regulation of macrophage differentiation	0.0358575	0.0699397	PRKCA	1
BP	GO:0046325	negative regulation of glucose import	0.0358575	0.0699397	GSK3A	1
BP	GO:0046653	tetrahydrofolate metabolic process	0.0358575	0.0699397	TYMS	1
BP	GO:0048385	regulation of retinoic acid receptor signaling pathway	0.0358575	0.0699397	EZH2	1
BP	GO:0060044	negative regulation of cardiac muscle cell proliferation	0.0358575	0.0699397	MAPK11	1
BP	GO:2000095	regulation of Wnt signaling pathway, planar cell polarity pathway	0.0358575	0.0699397	ABL1	1
BP	GO:0055007	cardiac muscle cell differentiation	0.0358854	0.0699397	CDK1/GSK3A	2
BP	GO:0070585	protein localization to mitochondrion	0.0358854	0.0699397	SAE1/GSK3A	2
BP	GO:0097193	intrinsic apoptotic signaling pathway	0.0359247	0.0699397	MELK/ABL1/ERCC2	3
BP	GO:0046328	regulation of JNK cascade	0.0363857	0.0707189	MAP3K11/PRMT1	2
BP	GO:0031109	microtubule polymerization or depolymerization	0.0373945	0.0725584	CSNK1D/ABL1	2
BP	GO:0006354	DNA-templated transcription elongation	0.0379029	0.0727514	EZH2/ERCC2	2
BP	GO:0000712	resolution of meiotic recombination intermediates	0.0380564	0.0727514	TOP2A	1
BP	GO:0032488	Cdc42 protein signal transduction	0.0380564	0.0727514	ABL1	1
BP	GO:0034134	toll-like receptor 2 signaling pathway	0.0380564	0.0727514	IRAK1	1
BP	GO:0051447	negative regulation of meiotic cell cycle	0.0380564	0.0727514	PKMYT1	1
BP	GO:0051782	negative regulation of cell division	0.0380564	0.0727514	AURKB	1
BP	GO:0060192	negative regulation of lipase activity	0.0380564	0.0727514	ABL1	1
BP	GO:1902036	regulation of hematopoietic stem cell differentiation	0.0380564	0.0727514	ABL1	1
BP	GO:1904948	midbrain dopaminergic neuron differentiation	0.0380564	0.0727514	CSNK1D	1
BP	GO:0060485	mesenchyme development	0.0382266	0.0729558	MDM4/MAPK3/EZH2	3
BP	GO:0000018	regulation of DNA recombination	0.0384139	0.0729558	ABL1/ERCC2	2
BP	GO:0051209	release of sequestered calcium ion into cytosol	0.0384139	0.0729558	FKBP1A/ABL1	2
BP	GO:0098781	ncRNA transcription	0.0384139	0.0729558	CDK7/ERCC2	2
BP	GO:0007266	Rho protein signal transduction	0.0389277	0.0736911	BCR/ABL1	2
BP	GO:0051283	negative regulation of sequestering of calcium ion	0.0389277	0.0736911	FKBP1A/ABL1	2
BP	GO:0021700	developmental maturation	0.0391089	0.0737942	CDC25B/TYMS/ERCC2	3
BP	GO:0048545	response to steroid hormone	0.0391089	0.0737942	RXRB/GSK3A/TYMS	3
BP	GO:0007098	centrosome cycle	0.039444	0.0743061	CDK1/KIF11	2
BP	GO:0008277	regulation of G protein-coupled receptor signaling pathway	0.0399631	0.0743808	GSK3A/PRKCA	2
BP	GO:0051282	regulation of sequestering of calcium ion	0.0399631	0.0743808	FKBP1A/ABL1	2
BP	GO:1903052	positive regulation of proteolysis involved in protein catabolic process	0.0399631	0.0743808	CSNK1D/GSK3A	2
BP	GO:0020027	hemoglobin metabolic process	0.0402504	0.0743808	PRMT1	1
BP	GO:0033194	response to hydroperoxide	0.0402504	0.0743808	XRCC1	1
BP	GO:0043249	erythrocyte maturation	0.0402504	0.0743808	ERCC2	1
BP	GO:0045780	positive regulation of bone resorption	0.0402504	0.0743808	PRKCA	1
BP	GO:0045820	negative regulation of glycolytic process	0.0402504	0.0743808	HDAC4	1
BP	GO:0060263	regulation of respiratory burst	0.0402504	0.0743808	BCR	1
BP	GO:0060576	intestinal epithelial cell development	0.0402504	0.0743808	TYMS	1
BP	GO:1901970	positive regulation of mitotic sister chromatid separation	0.0402504	0.0743808	AURKB	1
BP	GO:1901978	positive regulation of cell cycle checkpoint	0.0402504	0.0743808	AURKB	1
BP	GO:0062012	regulation of small molecule metabolic process	0.0412084	0.0758963	WDR5/GSK3A/HDAC4	3
BP	GO:0001889	liver development	0.0415357	0.0758963	TYMS/EZH2	2
BP	GO:0007093	mitotic cell cycle checkpoint signaling	0.0415357	0.0758963	CDK1/AURKB	2
BP	GO:0006605	protein targeting	0.0418186	0.0758963	SAE1/CDK5/GSK3A	3
BP	GO:0032434	regulation of proteasomal ubiquitin-dependent protein catabolic process	0.0420651	0.0758963	CSNK1D/GSK3A	2
BP	GO:0051208	sequestering of calcium ion	0.0420651	0.0758963	FKBP1A/ABL1	2
BP	GO:1900180	regulation of protein localization to nucleus	0.0420651	0.0758963	CDK1/PIN1	2
BP	GO:0007265	Ras protein signal transduction	0.0424335	0.0758963	BCR/GRB2/ABL1	3
BP	GO:0001502	cartilage condensation	0.0424395	0.0758963	THRA	1
BP	GO:0002283	neutrophil activation involved in immune response	0.0424395	0.0758963	BCR	1
BP	GO:0006743	ubiquinone metabolic process	0.0424395	0.0758963	NQO1	1
BP	GO:0009148	pyrimidine nucleoside triphosphate biosynthetic process	0.0424395	0.0758963	TYMS	1
BP	GO:0009301	snRNA transcription	0.0424395	0.0758963	CDK7	1
BP	GO:0010759	positive regulation of macrophage chemotaxis	0.0424395	0.0758963	MAPK3	1
BP	GO:0031060	regulation of histone methylation	0.0424395	0.0758963	WDR5	1
BP	GO:0034162	toll-like receptor 9 signaling pathway	0.0424395	0.0758963	IRAK1	1
BP	GO:0035372	protein localization to microtubule	0.0424395	0.0758963	ABL1	1
BP	GO:0038166	angiotensin-activated signaling pathway	0.0424395	0.0758963	PRKCA	1
BP	GO:0045091	regulation of single stranded viral RNA replication via double stranded DNA intermediate	0.0424395	0.0758963	TOP2A	1
BP	GO:0070314	G1 to G0 transition	0.0424395	0.0758963	EZH2	1
BP	GO:1904505	regulation of telomere maintenance in response to DNA damage	0.0424395	0.0758963	XRCC1	1
BP	GO:0006997	nucleus organization	0.0425971	0.0760613	CDK1/PRKCA	2
BP	GO:0061008	hepaticobiliary system development	0.0431316	0.0768978	TYMS/EZH2	2
BP	GO:0051053	negative regulation of DNA metabolic process	0.0436686	0.0775139	ABL1/XRCC1	2
BP	GO:1903008	organelle disassembly	0.0436686	0.0775139	CDK1/GSK3A	2
BP	GO:0034249	negative regulation of amide metabolic process	0.0436769	0.0775139	TYMS/PIN1/CSNK2A1	3
BP	GO:0002768	immune response-regulating cell surface receptor signaling pathway	0.0439907	0.0776553	IRAK1/GRB2/ABL1	3
BP	GO:0032006	regulation of TOR signaling	0.0442082	0.0776553	GSK3A/MAPK3	2
BP	GO:0071456	cellular response to hypoxia	0.0442082	0.0776553	IRAK1/MDM4	2
BP	GO:2000377	regulation of reactive oxygen species metabolic process	0.0442082	0.0776553	BCR/GRB2	2
BP	GO:0002755	MyD88-dependent toll-like receptor signaling pathway	0.0446237	0.0776553	IRAK1	1
BP	GO:0032515	negative regulation of phosphoprotein phosphatase activity	0.0446237	0.0776553	FKBP1A	1
BP	GO:0034244	negative regulation of transcription elongation by RNA polymerase II	0.0446237	0.0776553	EZH2	1
BP	GO:0039692	single stranded viral RNA replication via double stranded DNA intermediate	0.0446237	0.0776553	TOP2A	1
BP	GO:0045653	negative regulation of megakaryocyte differentiation	0.0446237	0.0776553	PRMT1	1
BP	GO:0051568	histone H3-K4 methylation	0.0446237	0.0776553	WDR5	1
BP	GO:0060216	definitive hemopoiesis	0.0446237	0.0776553	BCR	1
BP	GO:0061050	regulation of cell growth involved in cardiac muscle cell development	0.0446237	0.0776553	GSK3A	1
BP	GO:1902004	positive regulation of amyloid-beta formation	0.0446237	0.0776553	GSK3A	1
BP	GO:0060078	regulation of postsynaptic membrane potential	0.0447502	0.0777593	CDK5/GSK3A	2
BP	GO:0051235	maintenance of location	0.045257	0.0783546	CDK5/FKBP1A/ABL1	3
BP	GO:0002687	positive regulation of leukocyte migration	0.0452948	0.0783546	MAPK3/ABL1	2
BP	GO:0031960	response to corticosteroid	0.0452948	0.0783546	GSK3A/TYMS	2
BP	GO:0007612	learning	0.0458418	0.079066	CDK5/ABL1	2
BP	GO:0010508	positive regulation of autophagy	0.0458418	0.079066	GSK3A/MAPK3	2
BP	GO:0002902	regulation of B cell apoptotic process	0.0468031	0.0793041	AURKB	1
BP	GO:0010224	response to UV-B	0.0468031	0.0793041	MAPK11	1
BP	GO:0010829	negative regulation of glucose transmembrane transport	0.0468031	0.0793041	GSK3A	1
BP	GO:0034104	negative regulation of tissue remodeling	0.0468031	0.0793041	BCR	1
BP	GO:0042790	nucleolar large rRNA transcription by RNA polymerase I	0.0468031	0.0793041	ERCC2	1
BP	GO:0045722	positive regulation of gluconeogenesis	0.0468031	0.0793041	WDR5	1
BP	GO:0051315	attachment of mitotic spindle microtubules to kinetochore	0.0468031	0.0793041	AURKB	1
BP	GO:0051988	regulation of attachment of spindle microtubules to kinetochore	0.0468031	0.0793041	AURKB	1
BP	GO:0090043	regulation of tubulin deacetylation	0.0468031	0.0793041	WDR5	1
BP	GO:0090231	regulation of spindle checkpoint	0.0468031	0.0793041	AURKB	1
BP	GO:0090266	regulation of mitotic cell cycle spindle assembly checkpoint	0.0468031	0.0793041	AURKB	1
BP	GO:1903504	regulation of mitotic spindle checkpoint	0.0468031	0.0793041	AURKB	1
BP	GO:0031346	positive regulation of cell projection organization	0.0468654	0.0793041	MAP2K2/EZH2/ABL1	3
BP	GO:0031589	cell-substrate adhesion	0.0471905	0.0797383	CDK5/BCR/ABL1	3
BP	GO:0006352	DNA-templated transcription initiation	0.0480545	0.0809631	CDK7/THRA	2
BP	GO:0031023	microtubule organizing center organization	0.0480545	0.0809631	CDK1/KIF11	2
BP	GO:0000083	regulation of transcription involved in G1/S transition of mitotic cell cycle	0.0489776	0.0819256	CDK5	1
BP	GO:0009129	pyrimidine nucleoside monophosphate metabolic process	0.0489776	0.0819256	TYMS	1
BP	GO:0051443	positive regulation of ubiquitin-protein transferase activity	0.0489776	0.0819256	PIN1	1
BP	GO:0060713	labyrinthine layer morphogenesis	0.0489776	0.0819256	GRB2	1
BP	GO:0071305	cellular response to vitamin D	0.0489776	0.0819256	RXRB	1
BP	GO:0010639	negative regulation of organelle organization	0.0494978	0.0826769	TOP2A/AURKB/XRCC1	3
BP	GO:0050770	regulation of axonogenesis	0.0497393	0.0829614	CDK5/MAP2K2	2
CC	GO:1902554	serine/threonine protein kinase complex	3.17028e-07	2.73645e-05	CDK7/CDK5/CCNE1/CDK1/CSNK2A1/ERCC2	6
CC	GO:1902911	protein kinase complex	7.45743e-07	3.21847e-05	CDK7/CDK5/CCNE1/CDK1/CSNK2A1/ERCC2	6
CC	GO:0000307	cyclin-dependent protein kinase holoenzyme complex	5.53927e-06	0.000159375	CDK7/CDK5/CCNE1/CDK1	4
CC	GO:0005876	spindle microtubule	2.79331e-05	0.000602766	CDK1/CSNK1D/KIF11/AURKB	4
CC	GO:0005819	spindle	3.51349e-05	0.00060654	CDK1/CDC25B/CSNK1D/KIF11/WDR5/AURKB/ERCC2	7
CC	GO:0061695	transferase complex, transferring phosphorus-containing groups	4.77231e-05	0.000686543	CDK7/CDK5/CCNE1/CDK1/CSNK2A1/ERCC2	6
CC	GO:0005874	microtubule	5.8382e-05	0.000719899	CDK5/CDK1/MAP3K11/MAP2K2/CSNK1D/KIF11/AURKB	7
CC	GO:0098687	chromosomal region	0.00020445	0.00220591	APEX1/CDK1/TOP2A/AURKB/EZH2/XRCC1	6
CC	GO:0000439	transcription factor TFIIH core complex	0.000297316	0.00285145	CDK7/ERCC2	2
CC	GO:0005675	transcription factor TFIIH holo complex	0.000350891	0.00302874	CDK7/ERCC2	2
CC	GO:0000781	chromosome, telomeric region	0.000501499	0.00393521	APEX1/CDK1/EZH2/XRCC1	4
CC	GO:0072686	mitotic spindle	0.000660422	0.0047039	CDK1/KIF11/WDR5/AURKB	4
CC	GO:0000118	histone deacetylase complex	0.000740426	0.0047039	HDAC5/HDAC4/CSNK2A1	3
CC	GO:0032806	carboxy-terminal domain protein kinase complex	0.00076295	0.0047039	CDK7/ERCC2	2
CC	GO:0034708	methyltransferase complex	0.00116973	0.00673105	WDR5/EZH2/PRMT1	3
CC	GO:0001673	male germ cell nucleus	0.0056548	0.0305061	CDK7/TOP2A	2
CC	GO:0036064	ciliary basal body	0.00608853	0.0309139	CSNK1D/PIN1/PRKCA	3
CC	GO:0000922	spindle pole	0.00648701	0.0311073	CDC25B/KIF11/AURKB	3
CC	GO:0035097	histone methyltransferase complex	0.00820453	0.0372727	WDR5/EZH2	2
CC	GO:0043073	germ cell nucleus	0.00950482	0.0399168	CDK7/TOP2A	2
CC	GO:0030496	midbody	0.00971147	0.0399168	CDK1/AURKB/PIN1	3
CC	GO:0017053	transcription repressor complex	0.0120598	0.0463323	MDM4/HDAC4	2
CC	GO:0016607	nuclear speck	0.0123459	0.0463323	APEX1/HDAC5/HDAC4/PIN1	4
CC	GO:0016591	RNA polymerase II, holoenzyme	0.0152105	0.0547045	CDK7/ERCC2	2
CC	GO:0090575	RNA polymerase II transcription regulator complex	0.0174528	0.0585777	CDK7/RXRB/ERCC2	3
CC	GO:0000775	chromosome, centromeric region	0.0181854	0.0585777	TOP2A/AURKB/EZH2	3
CC	GO:0043025	neuronal cell body	0.0209277	0.0585777	CDK5/NQO1/GSK3A/ABL1	4
CC	GO:0035098	ESC/E(Z) complex	0.0214189	0.0585777	EZH2	1
CC	GO:0000109	nucleotide-excision repair complex	0.0235359	0.0585777	XRCC1	1
CC	GO:0019774	proteasome core complex, beta-subunit complex	0.0235359	0.0585777	PSMB5	1
CC	GO:0030877	beta-catenin destruction complex	0.0235359	0.0585777	GSK3A	1
CC	GO:0044545	NSL complex	0.0235359	0.0585777	WDR5	1
CC	GO:0055029	nuclear DNA-directed RNA polymerase complex	0.0240268	0.0585777	CDK7/ERCC2	2
CC	GO:0000428	DNA-directed RNA polymerase complex	0.0252463	0.0585777	CDK7/ERCC2	2
CC	GO:0044666	MLL3/4 complex	0.0256485	0.0585777	WDR5	1
CC	GO:0030880	RNA polymerase complex	0.026911	0.0585777	CDK7/ERCC2	2
CC	GO:0005677	chromatin silencing complex	0.0277567	0.0585777	EZH2	1
CC	GO:0034709	methylosome	0.0277567	0.0585777	PRMT1	1
CC	GO:0099524	postsynaptic cytosol	0.0277567	0.0585777	PIN1	1
CC	GO:0010369	chromocenter	0.0298604	0.0585777	AURKB	1
CC	GO:0031616	spindle pole centrosome	0.0298604	0.0585777	AURKB	1
CC	GO:0045120	pronucleus	0.0298604	0.0585777	EZH2	1
CC	GO:0140672	ATAC complex	0.0298604	0.0585777	WDR5	1
CC	GO:1990023	mitotic spindle midzone	0.0298604	0.0585777	AURKB	1
CC	GO:0019908	nuclear cyclin-dependent protein kinase holoenzyme complex	0.0319596	0.0599699	CDK7	1
CC	GO:0048188	Set1C/COMPASS complex	0.0319596	0.0599699	WDR5	1
CC	GO:0030018	Z disc	0.033074	0.0599884	FKBP1A/GGPS1	2
CC	GO:0097440	apical dendrite	0.0340544	0.0599884	GSK3A	1
CC	GO:0150005	enzyme activator complex	0.0340544	0.0599884	CDK7	1
CC	GO:0008180	COP9 signalosome	0.0361448	0.0623973	GRB2	1
CC	GO:0031143	pseudopodium	0.0382307	0.0647042	MAPK3	1
CC	GO:0031674	I band	0.0397336	0.0659545	FKBP1A/GGPS1	2
CC	GO:0005839	proteasome core complex	0.0423894	0.0677569	PSMB5	1
CC	GO:0099522	cytosolic region	0.0423894	0.0677569	PIN1	1
CC	GO:0005875	microtubule associated complex	0.0447758	0.0702701	KIF11/AURKB	2
CC	GO:0016580	Sin3 complex	0.0465305	0.0704617	CSNK2A1	1
CC	GO:0070822	Sin3-type complex	0.0465305	0.0704617	CSNK2A1	1
MF	GO:0106310	protein serine kinase activity	5.23511e-17	6.55767e-15	CDK7/CDK5/CDK1/MAP3K11/IRAK1/MAP2K2/BCR/CSNK1D/MELK/AURKB/GSK3A/MAPK11/PRKCA/PKMYT1/MAPK3/CSNK2A1	16
MF	GO:0004674	protein serine/threonine kinase activity	7.38647e-16	4.62626e-14	CDK7/CDK5/CDK1/MAP3K11/IRAK1/MAP2K2/BCR/CSNK1D/MELK/AURKB/GSK3A/MAPK11/PRKCA/PKMYT1/MAPK3/CSNK2A1	16
MF	GO:0140993	histone modifying activity	3.85706e-07	1.61049e-05	CDK1/WDR5/HDAC5/HDAC4/PRKCA/EZH2/PRMT1	7
MF	GO:0045309	protein phosphorylated amino acid binding	1.05006e-05	0.000328836	GRB2/PIN1/MAPK3/ABL1	4
MF	GO:0050321	tau-protein kinase activity	1.74771e-05	0.000437848	CDK5/CSNK1D/GSK3A	3
MF	GO:0140097	catalytic activity, acting on DNA	2.20072e-05	0.000459448	TDP1/APEX1/CDK7/TOP2A/XRCC1/ERCC2	6
MF	GO:0004693	cyclin-dependent protein serine/threonine kinase activity	4.10005e-05	0.000641982	CDK7/CDK5/CDK1	3
MF	GO:0097472	cyclin-dependent protein kinase activity	4.10005e-05	0.000641982	CDK7/CDK5/CDK1	3
MF	GO:0051219	phosphoprotein binding	6.36123e-05	0.000885364	GRB2/PIN1/MAPK3/ABL1	4
MF	GO:0048156	tau protein binding	0.00013537	0.00169568	CDK5/GSK3A/PIN1	3
MF	GO:0004712	protein serine/threonine/tyrosine kinase activity	0.000155148	0.00176676	MAP2K2/AURKB/MAPK3	3
MF	GO:0001784	phosphotyrosine residue binding	0.000176716	0.00184466	GRB2/MAPK3/ABL1	3
MF	GO:0031072	heat shock protein binding	0.000219123	0.00196062	CDK5/CDK1/IRAK1/CSNK2A1	4
MF	GO:0005080	protein kinase C binding	0.000225492	0.00196062	TOP2A/HDAC5/ABL1	3
MF	GO:0008353	RNA polymerase II CTD heptapeptide repeat kinase activity	0.00023478	0.00196062	CDK7/CDK1	2
MF	GO:0004713	protein tyrosine kinase activity	0.000292118	0.00228697	MAP2K2/BCR/MELK/ABL1	4
MF	GO:0042054	histone methyltransferase activity	0.000483609	0.00356344	WDR5/EZH2/PRMT1	3
MF	GO:0003684	damaged DNA binding	0.000599174	0.00409121	APEX1/XRCC1/ERCC2	3
MF	GO:0004707	MAP kinase activity	0.000620558	0.00409121	MAPK11/MAPK3	2
MF	GO:0004708	MAP kinase kinase activity	0.00078888	0.00494088	MAP2K2/MAPK3	2
MF	GO:0035173	histone kinase activity	0.000976768	0.00582633	CDK1/PRKCA	2
MF	GO:0004407	histone deacetylase activity	0.00107799	0.00613786	HDAC5/HDAC4	2
MF	GO:0033558	protein lysine deacetylase activity	0.00118405	0.00644858	HDAC5/HDAC4	2
MF	GO:0140994	RNA polymerase II CTD heptapeptide repeat modifying activity	0.0012949	0.00675847	CDK7/CDK1	2
MF	GO:0008276	protein methyltransferase activity	0.00135399	0.0067842	WDR5/EZH2/PRMT1	3
MF	GO:0008168	methyltransferase activity	0.00153626	0.00740139	WDR5/TYMS/EZH2/PRMT1	4
MF	GO:0008170	N-methyltransferase activity	0.00166444	0.00772197	WDR5/EZH2/PRMT1	3
MF	GO:0046875	ephrin receptor binding	0.00178592	0.00796433	GRB2/ABL1	2
MF	GO:0016741	transferase activity, transferring one-carbon groups	0.00184384	0.00796433	WDR5/TYMS/EZH2/PRMT1	4
MF	GO:0051019	mitogen-activated protein kinase binding	0.00192047	0.00801879	PRMT1/ABL1	2
MF	GO:0031490	chromatin DNA binding	0.00272034	0.0109922	APEX1/THRA/EZH2	3
MF	GO:0008094	ATP-dependent activity, acting on DNA	0.00285063	0.0111587	CDK7/TOP2A/ERCC2	3
MF	GO:0019213	deacetylase activity	0.00333913	0.0126749	HDAC5/HDAC4	2
MF	GO:0003755	peptidyl-prolyl cis-trans isomerase activity	0.00370424	0.0136472	FKBP1A/PIN1	2
MF	GO:0004520	DNA endonuclease activity	0.00389347	0.0139345	APEX1/XRCC1	2
MF	GO:0016859	cis-trans isomerase activity	0.00428517	0.0141256	FKBP1A/PIN1	2
MF	GO:0051879	Hsp90 protein binding	0.00428517	0.0141256	CDK5/CSNK2A1	2
MF	GO:0140938	histone H3 methyltransferase activity	0.00428517	0.0141256	WDR5/EZH2	2
MF	GO:0004715	non-membrane spanning protein tyrosine kinase activity	0.00490551	0.0157559	MELK/ABL1	2
MF	GO:0001222	transcription corepressor binding	0.0053407	0.0167248	HDAC5/EZH2	2
MF	GO:0016853	isomerase activity	0.00587695	0.0179552	FKBP1A/TOP2A/PIN1	3
MF	GO:0004879	nuclear receptor activity	0.0065032	0.0189444	RXRB/THRA	2
MF	GO:0098531	ligand-activated transcription factor activity	0.0065032	0.0189444	RXRB/THRA	2
MF	GO:0016765	transferase activity, transferring alkyl or aryl (other than methyl) groups	0.00857943	0.0240937	GGPS1/HMBS	2
MF	GO:0004536	DNA nuclease activity	0.00885726	0.0240937	APEX1/XRCC1	2
MF	GO:0016279	protein-lysine N-methyltransferase activity	0.00913909	0.0240937	WDR5/EZH2	2
MF	GO:0008757	S-adenosylmethionine-dependent methyltransferase activity	0.00932806	0.0240937	WDR5/EZH2/PRMT1	3
MF	GO:0042578	phosphoric ester hydrolase activity	0.00940097	0.0240937	TDP1/APEX1/CDC25C/CDC25B	4
MF	GO:0016278	lysine N-methyltransferase activity	0.0094249	0.0240937	WDR5/EZH2	2
MF	GO:0016811	hydrolase activity, acting on carbon-nitrogen (but not peptide) bonds, in linear amides	0.0118525	0.0296937	HDAC5/HDAC4	2
MF	GO:0004518	nuclease activity	0.0124326	0.0305363	TDP1/APEX1/XRCC1	3
MF	GO:0004527	exonuclease activity	0.0152292	0.0366856	TDP1/APEX1	2
MF	GO:0008081	phosphoric diester hydrolase activity	0.0174306	0.0411963	TDP1/APEX1	2
MF	GO:0004725	protein tyrosine phosphatase activity	0.0209693	0.0460275	CDC25C/CDC25B	2
MF	GO:0035591	signaling adaptor activity	0.0217931	0.0460275	MAP2K2/GRB2	2
MF	GO:0000014	single-stranded DNA endodeoxyribonuclease activity	0.0230121	0.0460275	XRCC1	1
MF	GO:0005528	FK506 binding	0.0230121	0.0460275	FKBP1A	1
MF	GO:0008641	ubiquitin-like modifier activating enzyme activity	0.0230121	0.0460275	SAE1	1
MF	GO:0016653	oxidoreductase activity, acting on NAD(P)H, heme protein as acceptor	0.0230121	0.0460275	NQO1	1
MF	GO:0032356	oxidized DNA binding	0.0230121	0.0460275	XRCC1	1
MF	GO:0050815	phosphoserine residue binding	0.0230121	0.0460275	PIN1	1
MF	GO:0070878	primary miRNA binding	0.0230121	0.0460275	EZH2	1
MF	GO:0004523	RNA-DNA hybrid ribonuclease activity	0.0252847	0.0460275	APEX1	1
MF	GO:0004706	JUN kinase kinase kinase activity	0.0252847	0.0460275	MAP3K11	1
MF	GO:0005078	MAP-kinase scaffold activity	0.0252847	0.0460275	MAP2K2	1
MF	GO:0034713	type I transforming growth factor beta receptor binding	0.0252847	0.0460275	FKBP1A	1
MF	GO:0140996	histone H3 kinase activity	0.0252847	0.0460275	PRKCA	1
MF	GO:0003906	DNA-(apurinic or apyrimidinic site) endonuclease activity	0.027552	0.0460275	APEX1	1
MF	GO:0005165	neurotrophin receptor binding	0.027552	0.0460275	GRB2	1
MF	GO:0005527	macrolide binding	0.027552	0.0460275	FKBP1A	1
MF	GO:0016273	arginine N-methyltransferase activity	0.027552	0.0460275	PRMT1	1
MF	GO:0016274	protein-arginine N-methyltransferase activity	0.027552	0.0460275	PRMT1	1
MF	GO:0032794	GTPase activating protein binding	0.027552	0.0460275	PIN1	1
MF	GO:0070697	activin receptor binding	0.027552	0.0460275	FKBP1A	1
MF	GO:0001221	transcription coregulator binding	0.0279259	0.0460275	HDAC5/EZH2	2
MF	GO:0003774	cytoskeletal motor activity	0.0279259	0.0460275	KIF11/PIN1	2
MF	GO:0005542	folic acid binding	0.0298143	0.0461066	TYMS	1
MF	GO:0019104	DNA N-glycosylase activity	0.0298143	0.0461066	APEX1	1
MF	GO:0030955	potassium ion binding	0.0298143	0.0461066	HDAC4	1
MF	GO:0034236	protein kinase A catalytic subunit binding	0.0298143	0.0461066	GSK3A	1
MF	GO:0043560	insulin receptor substrate binding	0.0298143	0.0461066	GRB2	1
MF	GO:0016888	endodeoxyribonuclease activity, producing 5'-phosphomonoesters	0.0320714	0.0477177	APEX1	1
MF	GO:1990825	sequence-specific mRNA binding	0.0320714	0.0477177	TYMS	1
MF	GO:0017124	SH3 domain binding	0.0326812	0.0477177	GRB2/ABL1	2
MF	GO:0004519	endonuclease activity	0.0341659	0.0477177	APEX1/XRCC1	2
MF	GO:0004698	calcium-dependent protein kinase C activity	0.0343234	0.0477177	PRKCA	1
MF	GO:0008296	3'-5'-DNA exonuclease activity	0.0343234	0.0477177	APEX1	1
MF	GO:0031435	mitogen-activated protein kinase kinase kinase binding	0.0343234	0.0477177	MAP3K11	1
MF	GO:0042826	histone deacetylase binding	0.0351702	0.0477177	HDAC5/HDAC4	2
MF	GO:0000900	mRNA regulatory element binding translation repressor activity	0.0365702	0.0477177	TYMS	1
MF	GO:0004697	protein kinase C activity	0.0365702	0.0477177	PRKCA	1
MF	GO:0008574	plus-end-directed microtubule motor activity	0.0365702	0.0477177	KIF11	1
MF	GO:0030548	acetylcholine receptor regulator activity	0.0365702	0.0477177	CDK5	1
MF	GO:0070411	I-SMAD binding	0.0365702	0.0477177	FKBP1A	1
MF	GO:0099602	neurotransmitter receptor regulator activity	0.0365702	0.0477177	CDK5	1
MF	GO:0140939	histone H4 methyltransferase activity	0.0365702	0.0477177	PRMT1	1
MF	GO:0004659	prenyltransferase activity	0.038812	0.0491082	GGPS1	1
MF	GO:0005068	transmembrane receptor protein tyrosine kinase adaptor activity	0.038812	0.0491082	GRB2	1
MF	GO:0070064	proline-rich region binding	0.038812	0.0491082	ABL1	1
MF	GO:0016810	hydrolase activity, acting on carbon-nitrogen (but not peptide) bonds	0.0398294	0.0498916	HDAC5/HDAC4	2
MF	GO:0000400	four-way junction DNA binding	0.0410486	0.0504106	ABL1	1
MF	GO:0008301	DNA binding, bending	0.0410486	0.0504106	TOP2A	1
MF	GO:0000979	RNA polymerase II core promoter sequence-specific DNA binding	0.0432802	0.0516325	EZH2	1
MF	GO:0031420	alkali metal ion binding	0.0432802	0.0516325	HDAC4	1
MF	GO:0042800	histone H3K4 methyltransferase activity	0.0432802	0.0516325	WDR5	1
MF	GO:0070003	threonine-type peptidase activity	0.0455067	0.0528405	PSMB5	1
MF	GO:1904047	S-adenosyl-L-methionine binding	0.0455067	0.0528405	PRMT1	1
MF	GO:0046982	protein heterodimerization activity	0.0455583	0.0528405	SAE1/IRAK1/TOP2A	3
MF	GO:0106222	lncRNA binding	0.0477281	0.0548493	EZH2	1
MF	GO:0009931	calcium-dependent protein serine/threonine kinase activity	0.0499445	0.0563622	PRKCA	1
MF	GO:0050699	WW domain binding	0.0499445	0.0563622	CDC25C	1

## Sheet: SV
Table SV. KEGG enrichment analysis.
ID	Description	P-value	FDRqvalue	GeneID	Count
hsa05206	MicroRNAs in cancer	9.2652e-09	8.48497e-07	CCNE1/MAP2K2/CDC25C/CDC25B/MDM4/HDAC5/GRB2/HDAC4/PRKCA/MAPK3/EZH2/ABL1	12
hsa04110	Cell cycle	4.95325e-07	2.26806e-05	CDK7/CCNE1/CDK1/CDC25C/CDC25B/AURKB/PKMYT1/ABL1	8
hsa04010	MAPK signaling pathway	5.65897e-05	0.000398648	MAP3K11/IRAK1/MAP2K2/CDC25B/GRB2/MAPK11/PRKCA/MAPK3	8
hsa05161	Hepatitis B	8.31062e-06	0.00019027	CCNE1/IRAK1/MAP2K2/GRB2/MAPK11/PRKCA/MAPK3	7
hsa05170	Human immunodeficiency virus 1 infection	4.70752e-05	0.000359258	CDK1/IRAK1/MAP2K2/CDC25C/MAPK11/PRKCA/MAPK3	7
hsa05022	Pathways of neurodegeneration - multiple diseases	0.00611403	0.00949011	CDK5/MAP2K2/MAPK11/PRKCA/MAPK3/CSNK2A1/PSMB5	7
hsa04540	Gap junction	3.56217e-06	0.00010874	CDK1/MAP2K2/CSNK1D/GRB2/PRKCA/MAPK3	6
hsa04914	Progesterone-mediated oocyte maturation	1.06034e-05	0.000194209	CDK1/CDC25C/CDC25B/MAPK11/PKMYT1/MAPK3	6
hsa04722	Neurotrophin signaling pathway	1.65899e-05	0.00021704	IRAK1/MAP2K2/GRB2/MAPK11/MAPK3/ABL1	6
hsa04114	Oocyte meiosis	3.82299e-05	0.000350105	CCNE1/CDK1/CDC25C/MAPK11/PKMYT1/MAPK3	6
hsa04613	Neutrophil extracellular trap formation	0.000235082	0.00119603	MAP2K2/HDAC5/MAPK11/HDAC4/PRKCA/MAPK3	6
hsa05203	Viral carcinogenesis	0.000325579	0.00141982	CCNE1/CDK1/HDAC5/GRB2/HDAC4/MAPK3	6
hsa05208	Chemical carcinogenesis - reactive oxygen species	0.00056087	0.00205455	MAP2K2/NQO1/GRB2/MAPK11/MAPK3/ABL1	6
hsa04664	Fc epsilon RI signaling pathway	1.48902e-05	0.00021704	MAP2K2/GRB2/MAPK11/PRKCA/MAPK3	5
hsa05223	Non-small cell lung cancer	1.96327e-05	0.000224743	RXRB/MAP2K2/GRB2/PRKCA/MAPK3	5
hsa05220	Chronic myeloid leukemia	2.5477e-05	0.000259239	MAP2K2/BCR/GRB2/MAPK3/ABL1	5
hsa04012	ErbB signaling pathway	4.35572e-05	0.000359258	MAP2K2/GRB2/PRKCA/MAPK3/ABL1	5
hsa04912	GnRH signaling pathway	6.34756e-05	0.000415216	MAP2K2/GRB2/MAPK11/PRKCA/MAPK3	5
hsa04919	Thyroid hormone signaling pathway	0.000229464	0.00119603	RXRB/MAP2K2/THRA/PRKCA/MAPK3	5
hsa04935	Growth hormone synthesis, secretion and action	0.000229464	0.00119603	MAP2K2/GRB2/MAPK11/PRKCA/MAPK3	5
hsa04926	Relaxin signaling pathway	0.000308389	0.0014121	MAP2K2/GRB2/MAPK11/PRKCA/MAPK3	5
hsa04068	FoxO signaling pathway	0.000342764	0.00142682	MAP2K2/GRB2/MAPK11/MAPK3/PRMT1	5
hsa05226	Gastric cancer	0.000595596	0.00209785	CCNE1/RXRB/MAP2K2/GRB2/MAPK3	5
hsa04218	Cellular senescence	0.00073284	0.00238643	CCNE1/CDK1/MAP2K2/MAPK11/MAPK3	5
hsa05225	Hepatocellular carcinoma	0.00104902	0.00291016	MAP2K2/NQO1/GRB2/PRKCA/MAPK3	5
hsa05205	Proteoglycans in cancer	0.0023497	0.0056627	MAP2K2/GRB2/MAPK11/PRKCA/MAPK3	5
hsa05207	Chemical carcinogenesis - receptor activation	0.00295113	0.00656501	RXRB/MAP2K2/GRB2/PRKCA/MAPK3	5
hsa05417	Lipid and atherosclerosis	0.00301085	0.00656501	IRAK1/RXRB/MAPK11/PRKCA/MAPK3	5
hsa05163	Human cytomegalovirus infection	0.00365736	0.00712633	MAP2K2/GRB2/MAPK11/PRKCA/MAPK3	5
hsa04014	Ras signaling pathway	0.00455891	0.00802885	MAP2K2/GRB2/PRKCA/MAPK3/ABL1	5
hsa04151	PI3K-Akt signaling pathway	0.024776	0.028362	CCNE1/MAP2K2/GRB2/PRKCA/MAPK3	5
hsa05010	Alzheimer disease	0.0331036	0.03445	CDK5/MAP2K2/MAPK3/CSNK2A1/PSMB5	5
hsa04370	VEGF signaling pathway	0.000159393	0.000973138	MAP2K2/MAPK11/PRKCA/MAPK3	4
hsa04917	Prolactin signaling pathway	0.000306153	0.0014121	MAP2K2/GRB2/MAPK11/MAPK3	4
hsa05214	Glioma	0.000397568	0.001583	MAP2K2/GRB2/PRKCA/MAPK3	4
hsa01521	EGFR tyrosine kinase inhibitor resistance	0.000483607	0.00184534	MAP2K2/GRB2/PRKCA/MAPK3	4
hsa05235	PD-L1 expression and PD-1 checkpoint pathway in cancer	0.000755702	0.00238643	MAP2K2/MAPK11/MAPK3/CSNK2A1	4
hsa05215	Prostate cancer	0.00104024	0.00291016	CCNE1/MAP2K2/GRB2/MAPK3	4
hsa01522	Endocrine resistance	0.00108044	0.00291016	MAP2K2/GRB2/MAPK11/MAPK3	4
hsa05231	Choline metabolism in cancer	0.00108044	0.00291016	MAP2K2/GRB2/PRKCA/MAPK3	4
hsa04620	Toll-like receptor signaling pathway	0.00154447	0.00404116	IRAK1/MAP2K2/MAPK11/MAPK3	4
hsa04071	Sphingolipid signaling pathway	0.00233523	0.0056627	MAP2K2/MAPK11/PRKCA/MAPK3	4
hsa04660	T cell receptor signaling pathway	0.00233523	0.0056627	MAP2K2/GRB2/MAPK11/MAPK3	4
hsa04650	Natural killer cell mediated cytotoxicity	0.00328047	0.00684745	MAP2K2/GRB2/PRKCA/MAPK3	4
hsa05135	Yersinia infection	0.00364615	0.00712633	IRAK1/MAP2K2/MAPK11/MAPK3	4
hsa04371	Apelin signaling pathway	0.00383902	0.00717496	MAP2K2/HDAC5/HDAC4/MAPK3	4
hsa04550	Signaling pathways regulating pluripotency of stem cells	0.00424536	0.00762325	MAP2K2/GRB2/MAPK11/MAPK3	4
hsa04072	Phospholipase D signaling pathway	0.00479312	0.00828205	MAP2K2/GRB2/PRKCA/MAPK3	4
hsa04934	Cushing syndrome	0.00551112	0.00901255	CCNE1/MAP2K2/WDR5/MAPK3	4
hsa04150	mTOR signaling pathway	0.00589581	0.00930917	MAP2K2/GRB2/PRKCA/MAPK3	4
hsa04360	Axon guidance	0.010003	0.0145406	CDK5/PRKCA/MAPK3/ABL1	4
hsa05034	Alcoholism	0.0107657	0.0154049	HDAC5/GRB2/HDAC4/MAPK3	4
hsa05130	Pathogenic Escherichia coli infection	0.0139599	0.0181669	IRAK1/MAPK11/MAPK3/ABL1	4
hsa04015	Rap1 signaling pathway	0.016139	0.0197066	MAP2K2/MAPK11/PRKCA/MAPK3	4
hsa05171	Coronavirus disease - COVID-19	0.0236013	0.0274899	IRAK1/MAPK11/PRKCA/MAPK3	4
hsa05132	Salmonella infection	0.0280089	0.0302233	IRAK1/MAP2K2/MAPK11/MAPK3	4
hsa05020	Prion disease	0.0386576	0.0372655	MAPK11/MAPK3/CSNK2A1/PSMB5	4
hsa05216	Thyroid cancer	0.000640118	0.00217116	RXRB/MAP2K2/MAPK3	3
hsa03410	Base excision repair	0.00106687	0.00291016	TDP1/APEX1/XRCC1	3
hsa05213	Endometrial cancer	0.00249596	0.00586096	MAP2K2/GRB2/MAPK3	3
hsa04730	Long-term depression	0.00261894	0.00599599	MAP2K2/PRKCA/MAPK3	3
hsa04929	GnRH secretion	0.00328993	0.00684745	MAP2K2/PRKCA/MAPK3	3
hsa04720	Long-term potentiation	0.00358516	0.00712633	MAP2K2/PRKCA/MAPK3	3
hsa05221	Acute myeloid leukemia	0.00373867	0.00713299	MAP2K2/GRB2/MAPK3	3
hsa05211	Renal cell carcinoma	0.00405762	0.00743185	MAP2K2/GRB2/MAPK3	3
hsa04115	p53 signaling pathway	0.00492606	0.00835413	CCNE1/CDK1/MDM4	3
hsa05133	Pertussis	0.005497	0.00901255	IRAK1/MAPK11/MAPK3	3
hsa05140	Leishmaniasis	0.00569579	0.00915113	IRAK1/MAPK11/MAPK3	3
hsa03083	Polycomb repressive complex	0.00653401	0.00997296	WDR5/AURKB/EZH2	3
hsa05210	Colorectal cancer	0.00744224	0.011173	MAP2K2/GRB2/MAPK3	3
hsa04662	B cell receptor signaling pathway	0.00842188	0.0124398	MAP2K2/GRB2/MAPK3	3
hsa04916	Melanogenesis	0.0111912	0.0155284	MAP2K2/PRKCA/MAPK3	3
hsa04933	AGE-RAGE signaling pathway in diabetic complications	0.0111912	0.0155284	MAPK11/PRKCA/MAPK3	3
hsa05142	Chagas disease	0.0118009	0.0161301	IRAK1/MAPK11/MAPK3	3
hsa04659	Th17 cell differentiation	0.013744	0.0181669	RXRB/MAPK11/MAPK3	3
hsa04066	HIF-1 signaling pathway	0.0140846	0.0181669	MAP2K2/PRKCA/MAPK3	3
hsa05145	Toxoplasmosis	0.0147801	0.0187993	IRAK1/MAPK11/MAPK3	3
hsa04928	Parathyroid hormone synthesis, secretion and action	0.0158596	0.0196271	RXRB/PRKCA/MAPK3	3
hsa04728	Dopaminergic synapse	0.022804	0.0271216	GSK3A/MAPK11/PRKCA	3
hsa04270	Vascular smooth muscle contraction	0.023714	0.0274899	MAP2K2/PRKCA/MAPK3	3
hsa04910	Insulin signaling pathway	0.0255929	0.0287701	MAP2K2/GRB2/MAPK3	3
hsa04915	Estrogen signaling pathway	0.026075	0.0287701	MAP2K2/GRB2/MAPK3	3
hsa05162	Measles	0.026075	0.0287701	CCNE1/IRAK1/CSNK2A1	3
hsa04380	Osteoclast differentiation	0.028052	0.0302233	GRB2/MAPK11/MAPK3	3
hsa05224	Breast cancer	0.0306336	0.0326208	MAP2K2/GRB2/MAPK3	3
hsa04723	Retrograde endocannabinoid signaling	0.0311646	0.0328048	MAPK11/PRKCA/MAPK3	3
hsa04261	Adrenergic signaling in cardiomyocytes	0.0338925	0.0346718	MAPK11/PRKCA/MAPK3	3
hsa04921	Oxytocin signaling pathway	0.0344526	0.0346718	MAP2K2/PRKCA/MAPK3	3
hsa04148	Efferocytosis	0.0355875	0.0350437	MAP2K2/MAPK11/MAPK3	3
hsa04932	Non-alcoholic fatty liver disease	0.0355875	0.0350437	MAP3K11/GSK3A/MAPK11	3
hsa05160	Hepatitis C	0.0367417	0.0357953	MAP2K2/GRB2/MAPK3	3
hsa05164	Influenza A	0.0453573	0.0419573	MAP2K2/PRKCA/MAPK3	3
hsa04960	Aldosterone-regulated sodium reabsorption	0.0132122	0.0177935	PRKCA/MAPK3	2
hsa05219	Bladder cancer	0.0152773	0.0191655	MAP2K2/MAPK3	2
hsa03022	Basal transcription factors	0.0174719	0.0210534	CDK7/ERCC2	2
hsa03420	Nucleotide excision repair	0.0341401	0.0346718	CDK7/ERCC2	2
hsa05230	Central carbon metabolism in cancer	0.0424496	0.0404947	MAP2K2/MAPK3	2
hsa04622	RIG-I-like receptor signaling pathway	0.043537	0.0411038	MAPK11/PIN1	2
hsa05218	Melanoma	0.0446347	0.0417102	MAP2K2/MAPK3	2
hsa01524	Platinum drug resistance	0.0468611	0.0429149	TOP2A/MAPK3	2

## Sheet: SVI
Table SVI. The mRNA-miRNA regulatory network.
Gene	miRNA	miRanda	miRDB	miRWalk	TargetScan
ERCC2	hsa-miR-875-3p	√	√	√	√
CSNK2A1	hsa-miR-331-3p	√	√	√	√
GGPS1	hsa-miR-34c-3p	√	√	√	√
PRKCA	hsa-miR-185-3p	√	√	√	√
MAP3K11	hsa-miR-125a-5p	√	√	√	√
WDR5	hsa-miR-1224-3p	√	√	√	√
MAPK3	hsa-miR-193b-5p	√	√	√	√
MDM4	hsa-miR-149-3p	√	√	√	√
MAPK3	hsa-miR-483-5p	√	√	√	√
MDM4	hsa-miR-512-3p	√	√	√	√
HDAC5	hsa-miR-518d-5p	√	√	√	√
HDAC4	hsa-miR-518a-5p	√	√	√	√
CSNK1D	hsa-miR-512-3p	√	√	√	√
WDR5	hsa-miR-361-3p	√	√	√	√
MDM4	hsa-miR-665	√	√	√	√
PRKCA	hsa-miR-30b-3p	√	√	√	√
MDM4	hsa-miR-671-5p	√	√	√	√
PRKCA	hsa-miR-612	√	√	√	√
IRAK1	hsa-miR-150-5p	√	√	√	√
PRKCA	hsa-miR-939-5p	√	√	√	√
BCR	hsa-miR-558	√	√	√	√
CSNK2A1	hsa-miR-143-3p	√	√	√	√
THRA	hsa-miR-106a-5p	√	√	√	√
MDM4	hsa-miR-570-3p	√	√	√	√
FKBP1A	hsa-miR-1229-3p	√	√	√	√
HDAC4	hsa-miR-488-3p	√	√	√	√
PRKCA	hsa-miR-361-3p	√	√	√	√
GGPS1	hsa-miR-505-3p	√	√	√	√
RXRB	hsa-miR-1224-3p	√	√	√	√
KIF11	hsa-miR-1237-3p	√	√	√	√
GGPS1	hsa-miR-9-5p	√	√	√	√
CDK1	hsa-miR-335-3p	√	√	√	√
ERCC2	hsa-miR-92a-2-5p	√	√	√	√
HDAC4	hsa-miR-106a-5p	√	√	√	√
FKBP1A	hsa-miR-625-5p	√	√	√	√
CSNK2A1	hsa-miR-485-5p	√	√	√	√
MDM4	hsa-miR-7-5p	√	√	√	√
ABL1	hsa-let-7f-2-3p	√	√	√	√
NQO1	hsa-miR-30b-3p	√	√	√	√
MDM4	hsa-miR-612	√	√	√	√
PRKCA	hsa-miR-1470	√	√	√	√
PRKCA	hsa-miR-186-5p	√	√	√	√
MDM4	hsa-miR-205-5p	√	√	√	√
PRKCA	hsa-miR-1972	√	√	√	√
MDM4	hsa-miR-197-3p	√	√	√	√
FKBP1A	hsa-miR-650	√	√	√	√
MDM4	hsa-miR-508-5p	√	√	√	√
PRKCA	hsa-miR-27a-5p	√	√	√	√
PRKCA	hsa-miR-326	√	√	√	√
RXRB	hsa-miR-488-3p	√	√	√	√
WDR5	hsa-miR-423-5p	√	√	√	√
MDM4	hsa-miR-21-3p	√	√	√	√
ABL1	hsa-miR-486-3p	√	√	√	√
PRKCA	hsa-miR-625-5p	√	√	√	√
MAPK3	hsa-miR-214-3p	√	√	√	√
MDM4	hsa-miR-876-3p	√	√	√	√
RXRB	hsa-miR-765	√	√	√	√
PRKCA	hsa-miR-205-5p	√	√	√	√
HDAC4	hsa-miR-1972	√	√	√	√
MDM4	hsa-miR-30b-3p	√	√	√	√
KIF11	hsa-miR-593-3p	√	√	√	√
PRKCA	hsa-miR-150-5p	√	√	√	√
PRKCA	hsa-miR-92a-2-5p	√	√	√	√
WDR5	hsa-miR-197-3p	√	√	√	√
CSNK2A1	hsa-miR-194-5p	√	√	√	√
MDM4	hsa-let-7a-5p	√	√	√	√
HDAC4	hsa-miR-198	√	√	√	√
EZH2	hsa-miR-101-3p	√	√	√	√
AURKB	hsa-miR-765	√	√	√	√
PRKCA	hsa-miR-1237-3p	√	√	√	√
MDM4	hsa-miR-9-5p	√	√	√	√
CDK1	hsa-miR-182-5p	√	√	√	√
PRKCA	hsa-miR-576-5p	√	√	√	√
HDAC4	hsa-miR-299-5p	√	√	√	√
THRA	hsa-miR-185-5p	√	√	√	√
FKBP1A	hsa-miR-338-3p	√	√	√	√
MAPK11	hsa-miR-873-5p	√	√	√	√
GSK3A	hsa-miR-149-3p	√	√	√	√
MDM4	hsa-miR-342-5p	√	√	√	√
KIF11	hsa-miR-708-3p	√	√	√	√
MDM4	hsa-miR-188-3p	√	√	√	√
ERCC2	hsa-miR-762	√	√	√	√
MDM4	hsa-miR-543	√	√	√	√
ABL1	hsa-miR-432-5p	√	√	√	√
NQO1	hsa-miR-149-3p	√	√	√	√
CDC25B	hsa-miR-1972	√	√	√	√
CDC25B	hsa-miR-486-3p	√	√	√	√
CSNK2A1	hsa-miR-326	√	√	√	√
BCR	hsa-miR-576-5p	√	√	√	√
MDM4	hsa-miR-888-5p	√	√	√	√
BCR	hsa-miR-671-5p	√	√	√	√
CSNK2A1	hsa-miR-30b-3p	√	√	√	√
MDM4	hsa-miR-34a-3p	√	√	√	√
MAPK3	hsa-miR-92a-2-5p	√	√	√	√
PRKCA	hsa-miR-432-3p	√	√	√	√
PRKCA	hsa-miR-516a-3p	√	√	√	√
KIF11	hsa-miR-193b-5p	√	√	√	√
MDM4	hsa-miR-130a-3p	√	√	√	√
GSK3A	hsa-miR-765	√	√	√	√
SAE1	hsa-miR-654-5p	√	√	√	√
HDAC5	hsa-miR-671-5p	√	√	√	√
MDM4	hsa-miR-31-5p	√	√	√	√
MDM4	hsa-miR-324-3p	√	√	√	√
RXRB	hsa-miR-345-5p	√	√	√	√
NQO1	hsa-miR-501-3p	√	√	√	√
PSMB5	hsa-miR-1184	√	√	√	√
RXRB	hsa-miR-432-5p	√	√	√	√
MDM4	hsa-miR-129-5p	√	√	√	√
HDAC5	hsa-miR-331-3p	√	√	√	√
CSNK2A1	hsa-miR-149-3p	√	√	√	√
MDM4	hsa-miR-185-5p	√	√	√	√
MDM4	hsa-miR-485-5p	√	√	√	√
MDM4	hsa-miR-625-5p	√	√	√	√
MDM4	hsa-miR-335-5p	√	√	√	√
RXRB	hsa-miR-509-3-5p	√	√	√	√
PRKCA	hsa-miR-1976	√	√	√	√
CSNK1D	hsa-miR-18a-3p	√	√	√	√
EZH2	hsa-miR-20a-3p	√	√	√	√
THRA	hsa-miR-1237-3p	√	√	√	√
MDM4	hsa-miR-135a-5p	√	√	√	√
MAP3K11	hsa-miR-512-3p	√	√	√	√
MDM4	hsa-miR-940	√	√	√	√
MDM4	hsa-miR-532-3p	√	√	√	√
CSNK1D	hsa-miR-432-5p	√	√	√	√
PRKCA	hsa-miR-362-5p	√	√	√	√
FKBP1A	hsa-miR-377-5p	√	√	√	√
WDR5	hsa-miR-1226-3p	√	√	√	√
HDAC5	hsa-miR-765	√	√	√	√
HDAC4	hsa-miR-218-2-3p	√	√	√	√
CSNK2A1	hsa-miR-188-3p	√	√	√	√
THRA	hsa-miR-143-5p	√	√	√	√
MAPK3	hsa-miR-486-3p	√	√	√	√
KIF11	hsa-miR-628-5p	√	√	√	√
HDAC4	hsa-miR-125b-2-3p	√	√	√	√
MDM4	hsa-miR-513a-3p	√	√	√	√
HDAC5	hsa-miR-9-5p	√	√	√	√
FKBP1A	hsa-miR-873-5p	√	√	√	√
THRA	hsa-miR-361-3p	√	√	√	√
HDAC5	hsa-miR-1197	√	√	√	√
GRB2	hsa-miR-185-5p	√	√	√	√
PRKCA	hsa-miR-888-5p	√	√	√	√
MDM4	hsa-miR-34a-5p	√	√	√	√
PRKCA	hsa-miR-940	√	√	√	√
PRKCA	hsa-miR-188-3p	√	√	√	√
HDAC4	hsa-miR-140-3p	√	√	√	√
HDAC4	hsa-miR-22-3p	√	√	√	√
CSNK2A1	hsa-miR-432-3p	√	√	√	√
THRA	hsa-miR-615-5p	√	√	√	√
HMBS	hsa-miR-143-3p	√	√	√	√
BCR	hsa-miR-1207-5p	√	√	√	√
HDAC4	hsa-miR-449c-5p	√	√	√	√
GSK3A	hsa-miR-92a-2-5p	√	√	√	√
HDAC4	hsa-miR-302a-3p	√	√	√	√
MDM4	hsa-miR-186-3p	√	√	√	√
MDM4	hsa-miR-130b-5p	√	√	√	√
MELK	hsa-miR-181a-5p	√	√	√	√
CDK1	hsa-miR-143-3p	√	√	√	√
HDAC4	hsa-miR-1225-3p	√	√	√	√
RXRB	hsa-miR-622	√	√	√	√
PRMT1	hsa-miR-149-3p	√	√	√	√
MAP3K11	hsa-miR-138-5p	√	√	√	√
SAE1	hsa-miR-92a-2-5p	√	√	√	√
PRKCA	hsa-miR-149-3p	√	√	√	√
MDM4	hsa-miR-26b-3p	√	√	√	√
CSNK1D	hsa-miR-671-5p	√	√	√	√
GSK3A	hsa-miR-877-3p	√	√	√	√
GRB2	hsa-miR-363-5p	√	√	√	√
PRKCA	hsa-miR-331-3p	√	√	√	√
GRB2	hsa-miR-27a-3p	√	√	√	√
CCNE1	hsa-miR-15a-5p	√	√	√	√
PRKCA	hsa-miR-30c-1-3p	√	√	√	√
RXRB	hsa-miR-1225-3p	√	√	√	√
FKBP1A	hsa-miR-142-3p	√	√	√	√
PSMB5	hsa-miR-921	√	√	√	√
MDM4	hsa-miR-382-5p	√	√	√	√
MDM4	hsa-miR-345-5p	√	√	√	√
MDM4	hsa-miR-432-5p	√	√	√	√
MDM4	hsa-miR-766-3p	√	√	√	√
FKBP1A	hsa-miR-218-5p	√	√	√	√
WDR5	hsa-miR-192-3p	√	√	√	√
PIN1	hsa-miR-1207-5p	√	√	√	√
NQO1	hsa-miR-299-5p	√	√	√	√
PRKCA	hsa-miR-92a-1-5p	√	√	√	√
BCR	hsa-miR-665	√	√	√	√
MDM4	hsa-miR-27a-3p	√	√	√	√
HDAC4	hsa-miR-1324	√	√	√	√
MAP3K11	hsa-miR-142-3p	√	√	√	√
ERCC2	hsa-miR-1976	√	√	√	√
WDR5	hsa-miR-31-5p	√	√	√	√

## Sheet: SVII
Table SVII. Univariate Cox analysis.
ID	Hazard ratio	Lower 95% confidence limit	Upper 95% confidence limit	P-value
TDP1	1.80546	1.3039	2.49994	0.000373632
APEX1	1.67998	1.23295	2.28909	0.00101389
CDK7	1.6316	1.21442	2.19208	0.00115645
SAE1	1.73361	1.35064	2.22516	1.56e-05
CDK5	1.68858	1.25475	2.27242	0.000544597
CCNE1	1.1277	1.00517	1.26517	0.0405812
FKBP1A	1.85444	1.41304	2.4337	8.47392e-06
CDK1	1.39263	1.20473	1.60984	7.51049e-06
MAP3K11	1.58467	1.11913	2.24388	0.00948165
IRAK1	1.49864	1.21894	1.84251	0.000123824
MAP2K2	1.599	1.20919	2.11447	0.000993733
TOP2A	1.27764	1.13206	1.44195	7.19928e-05
CDC25C	1.45934	1.22649	1.7364	2.02714e-05
CDC25B	1.48153	1.242	1.76726	1.25082e-05
NQO1	1.10131	1.03625	1.17045	0.00189603
CSNK1D	1.90284	1.37373	2.63575	0.000108815
KIF11	1.48938	1.24821	1.77714	9.87128e-06
MELK	1.4499	1.23967	1.69579	3.35223e-06
WDR5	1.53015	1.13769	2.058	0.00490666
AURKB	1.32904	1.15441	1.53009	7.56189e-05
GSK3A	1.72813	1.24638	2.39609	0.0010349
HDAC5	1.6335	1.22817	2.1726	0.000745297
TYMS	1.30106	1.0984	1.54112	0.00231706
GRB2	1.91254	1.39352	2.62488	5.96488e-05
HDAC4	1.72038	1.24391	2.37934	0.00104125
GGPS1	1.53825	1.13444	2.08579	0.00557364
HMBS	1.81042	1.313	2.49629	0.000293049
PKMYT1	1.40919	1.17287	1.69312	0.000249752
MAPK3	1.64478	1.2459	2.17137	0.000445792
CSNK2A1	1.59032	1.18521	2.13391	0.00198353
EZH2	1.67005	1.36745	2.03961	4.94907e-07
PSMB5	1.97218	1.38462	2.80906	0.000167754
PRMT1	1.48335	1.17448	1.87345	0.000932732
ABL1	1.32426	1.03836	1.68889	0.0236186
XRCC1	1.45006	1.08487	1.93819	0.0120648
ERCC2	1.53088	1.14035	2.05516	0.00459671

## Sheet: SVIII
Table SVIII. Air pollutant-hepatocellular cancer diagnostic markers.
LASSO	RF	SVM-RFE	& Gene
FKBP1A	PSMB5	MAPK11	PKMYT1
RXRB	AURKB	AURKB	PSMB5
MAP2K2	PKMYT1	PRKCA
THRA	EZH2	GRB2
NQO1	XRCC1	PKMYT1
CSNK1D	MAPK3	PIN1
WDR5	MAP2K2	CSNK1D
GRB2		PSMB5
MAPK11		ERCC2
GGPS1		RXRB
PRKCA		HMBS
HMBS		NQO1
PKMYT1		MAPK3
PSMB5		PRMT1
ABL1		ABL1
ERCC2

## Sheet: SIX
Table SIX. Binding energies in molecular docking.
Gene	1,3-Butadiene	Benzene	Carbon monoxide	Nitric oxide	Nitrogen dioxide	Ozone	Sulfur dioxide	Sulfur trioxide	Toluene	Vinyl chloride
PSMB5	-2.2	-3.8	-1.7	-1.9	-2.9	-3.1	-1.9	-2.4	-4.2	-2.3
FKBP1A	-3.8	-3.7	-1.2	-1.2	-2.3	-2.3	-1.6	-2.5	-3.5	-2.6
NQO1	-2.9	-3.2	-1.5	-1.5	-2.3	-2.8	-2.3	-2.4	-3.7	-2.3
AURKB	-2.8	-4.2	-1.5	-1.5	-2.6	-2.5	-2.2	-2.8	-3.8	-2
HMBS	-2.9	-4.2	-1.6	-2	-2.7	-3.6	-2.6	-3.2	-3.9	-2.1
EZH2	-3.3	-4.5	-1.6	-1.7	-2.9	-3	-2.4	-3.1	-4.1	-2.5
XRCC1	-3.2	-3.3	-1.9	-1.7	-2.9	-3.2	-2.5	-2.9	-3.5	-2.6
PKMYT1	-2.7	-3.6	-1.8	-1.8	-2.7	-2.8	-1.8	-3.2	-4	-2.4

## Sheet: SX
Table SX. Molecular docking of the target with existing inhibitors.
Gene	Inhibitors	Vina score
AURKB	Aurora kinases-IN-3	-7.6
EZH2	Tazemetostat	-10.1
FKBP1A	Sirolimus	-7.9
HMBS	Clofibride	-6.9
NQO1	ES 936	-7.1
PKMYT1	Estradiol	-9.2
PSMB5	Carfilzomib	-6.5
XRCC1	Etoposide	-10.8

[truncated: 4 more sheets: SXI, SXII, SXIII, SXIV]
